# Supplementary material for: TMT-Based Quantitative Proteomic Analysis of Intestinal Organoids Infected by Listeria monocytogenes Strains with Different Virulence
Source: MDPI journal article supplement (doi:10.3390/ijms23116231), 2022-06-02
Supplement: s1 [file s1]

**Table S2** Relative expression of DEPs in *Lm 10403s* vs. Control (D/B) and *Lm M7* vs. Control (F/B)

| <b>Protein accession</b> | <b>Protein description</b>                                           | <b>Gene name</b> | <b>MW [kDa]</b> | <b>D/B Ratio</b> | <b>F/B Ratio</b> |
|--------------------------|----------------------------------------------------------------------|------------------|-----------------|------------------|------------------|
| A2A6A1                   | G patch domain-containing protein 8                                  | Gpatch8          | 164.99          | 1.068            | 1.318            |
| A2AFS3                   | UPF0577 protein KIAA1324                                             | Kiaa1324         | 110.68          | 1.675            | 2.123            |
| A2ASQ1                   | Agrin                                                                | Agrn             | 207.54          | 1.133            | 1.36             |
| A4Q9F1                   | Protein monoglycylase TTLL8                                          | Ttll8            | 94.914          | 0.65             | 0.59             |
| A6BLY7                   | "Keratin, type I cytoskeletal                                        | Krt28            | 50.346          | 1.137            | 1.457            |
| B2RWS6                   | Histone acetyltransferase p300                                       | Ep300            | 263.3           | 1.165            | 1.409            |
| E9PV24                   | Fibrinogen alpha chain                                               | Fga              | 87.428          | 1.404            | 1.492            |
| E9Q414                   | Apolipoprotein B-100                                                 | Apob             | 509.43          | 1.302            | 1.204            |
| E9Q4F7                   | Ankyrin repeat domain-containing protein 11                          | Ankrd11          | 296.18          | 1.451            | 1.415            |
| F2YMG0                   | Serine protease 56                                                   | Prss56           | 65.133          | 1.136            | 2.246            |
| O08739                   | AMP deaminase 3                                                      | Ampd3            | 88.651          | 1.227            | 1.304            |
| O08811                   | General transcription and DNA repair factor IIH helicase subunit XPD | Ercc2            | 86.841          | 1.182            | 1.395            |
| O35054                   | Claudin-4                                                            | Cldn4            | 22.338          | 2.314            | 2.539            |
| O35215                   | D-dopachrome decarboxylase                                           | Ddt              | 13.077          | 0.744            | 0.859            |
| O35682                   | Myeloid-associated differentiation marker OS=Mus musculus            | Myadm            | 35.284          | 1.354            | 1.17             |
| O35685                   | Nuclear migration protein nudC                                       | Nudc             | 38.358          | 0.765            | 0.789            |
| O54750                   | Cytochrome P450 2J6                                                  | Cyp2j6           | 57.791          | 1.278            | 1.354            |
| O55071                   | Cytochrome P450 2B19                                                 | Cyp2b19          | 55.996          | 1.309            | 1.532            |
| O70303                   | Cell death activator CIDE-B                                          | Cideb            | 24.8            | 1.398            | 1.214            |
| O70422                   | General transcription factor IIH subunit 4                           | Gtf2h4           | 52.224          | 1.161            | 1.361            |
| O70494                   | Transcription factor Sp3                                             | Sp3              | 82.361          | 1.165            | 1.439            |
| O70570                   | Polymeric immunoglobulin receptor                                    | Pigr             | 84.998          | 0.767            | 0.863            |
| O70572                   | Sphingomyelin phosphodiesterase 2                                    | Smpd2            | 47.466          | 1.344            | 1.159            |
| O88286                   | Protein Wiz                                                          | Wiz              | 184.29          | 0.644            | 0.818            |
| O88322                   | Nidogen-2                                                            | Nid2             | 153.91          | 1.318            | 1.379            |
| O88700                   | Bloom syndrome protein homolog                                       | Blm              | 158.36          | 1.681            | 2.059            |
| O88746                   | Target of Myb protein 1                                              | Tom1             | 54.325          | 1.278            | 1.999            |
| O88792                   | Junctional adhesion molecule A                                       | F11r             | 32.423          | 1.308            | 1.325            |
| O88844                   | Isocitrate dehydrogenase [NADP] cytoplasmic                          | Idh1             | 46.674          | 0.764            | 0.856            |
| O88947                   | Coagulation factor X                                                 | F10              | 54.017          | 0.884            | 1.632            |
| P01027                   | Complement C3                                                        | C3               | 186.48          | 1.242            | 1.479            |
| P02089                   | Hemoglobin subunit beta-2                                            | Hbb-b2           | 15.878          | 1.465            | 1.396            |
| P02463                   | Collagen alpha-1(IV) chain                                           | Col4a1           | 160.68          | 1.387            | 1.402            |
| P02468                   | Laminin subunit gamma-1                                              | Lamc1            | 177.3           | 1.452            | 1.544            |
| P02469                   | Laminin subunit beta-1                                               | Lamb1            | 197.09          | 1.405            | 1.47             |
| P02798                   | Metallothionein-2                                                    | Mt2              | 6.1153          | 0.676            | 0.754            |
| P02802                   | Metallothionein-1                                                    | Mt1              | 6.0181          | 0.678            | 0.81             |
| P03899                   | NADH-ubiquinone oxidoreductase chain 3                               | Mtnd3            | 13.219          | 1.336            | 1.32             |

|        |                                                                    |          |        |       |       |
|--------|--------------------------------------------------------------------|----------|--------|-------|-------|
| P04104 | "Keratin, type II cytoskeletal 1                                   | Krt1     | 65.605 | 1.579 | 1.969 |
| P05064 | Fructose-bisphosphate aldolase A                                   | Aldoa    | 39.355 | 0.789 | 0.745 |
| P06151 | L-lactate dehydrogenase A chain                                    | Ldha     | 36.498 | 0.828 | 0.76  |
| P06745 | Glucose-6-phosphate isomerase                                      | Gpi      | 62.766 | 0.768 | 0.784 |
| P07214 | SPARC OS=Mus musculus                                              | Sparc    | 34.45  | 1.288 | 1.303 |
| P08043 | Zinc finger protein 2                                              | Zfp2     | 52.534 | 0.981 | 0.746 |
| P08122 | Collagen alpha-2(IV) chain                                         | Col4a2   | 167.32 | 1.398 | 1.355 |
| P08228 | Superoxide dismutase [Cu-Zn]                                       | Sod1     | 15.942 | 0.685 | 0.794 |
| P09602 | Non-histone chromosomal protein HMG-17                             | Hmgn2    | 9.4226 | 0.721 | 1.721 |
| P09922 | Interferon-induced GTP-binding protein Mx1                         | Mx1      | 72.037 | 1.198 | 2.178 |
| P10107 | Annexin A1 OS=Mus musculus                                         | Anxa1    | 38.734 | 1.306 | 1.345 |
| P10493 | Nidogen-1 OS=Mus musculus                                          | Nid1     | 136.54 | 1.403 | 1.512 |
| P11276 | Fibronectin OS=Mus musculus                                        | Fn1      | 272.53 | 1.706 | 1.592 |
| P12710 | "Fatty acid-binding protein, liver                                 | Fabp1    | 14.245 | 0.749 | 0.838 |
| P14152 | "Malate dehydrogenase, cytoplasmic                                 | Mdh1     | 36.511 | 0.734 | 0.794 |
| P15864 | Histone H1.2 OS=Mus musculus                                       | Hist1h1c | 21.266 | 1.401 | 2.705 |
| P15920 | V-type proton ATPase 116 kDa subunit a isoform 2                   | Atp6v0a2 | 98.144 | 1.253 | 1.404 |
| P17182 | Alpha-enolase                                                      | Eno1     | 47.14  | 0.796 | 0.732 |
| P17665 | "Cytochrome c oxidase subunit 7C, mitochondrial                    | Cox7c    | 7.3325 | 1.367 | 1.115 |
| P17717 | UDP-glucuronosyltransferase 2B17                                   | Ugt2b17  | 60.855 | 1.328 | 1.279 |
| P17809 | "Solute carrier family 2, facilitated glucose transporter member 1 | Slc2a1   | 53.984 | 1.379 | 1.05  |
| P17897 | Lysozyme C-1                                                       | Lyz1     | 16.794 | 0.684 | 0.795 |
| P19137 | Laminin subunit alpha-1                                            | Lama1    | 338.14 | 1.406 | 1.482 |
| P19324 | Serpin H1                                                          | Serpinh1 | 46.533 | 1.523 | 1.6   |
| P20152 | Vimentin                                                           | Vim      | 53.687 | 1.2   | 1.323 |
| P20918 | Plasminogen                                                        | Plg      | 90.807 | 1.616 | 1.592 |
| P22315 | "Ferrochelatase, mitochondrial                                     | Fech     | 47.13  | 1.25  | 1.547 |
| P26350 | Prothymosin alpha                                                  | Ptma     | 12.254 | 0.756 | 0.737 |
| P27661 | Histone H2AX                                                       | H2afx    | 15.142 | 1.3   | 2.157 |
| P28798 | Granulins                                                          | Grn      | 63.458 | 1.297 | 1.46  |
| P30115 | Glutathione S-transferase A3                                       | Gsta3    | 25.36  | 0.761 | 0.795 |
| P31786 | Acyl-CoA-binding protein                                           | Dbi      | 10     | 0.732 | 0.84  |
| P34022 | Ran-specific GTPase-activating protein                             | Ranbp1   | 23.596 | 0.755 | 0.808 |
| P36536 | GTP-binding protein SAR1a                                          | Sar1a    | 22.371 | 1.436 | 2.088 |
| P39061 | Collagen alpha-1(XVIII) chain                                      | Col18a1  | 182.17 | 1.317 | 1.363 |
| P43137 | Lithostathine-1                                                    | Reg1     | 18.518 | 0.554 | 0.678 |
| P46412 | Glutathione peroxidase 3                                           | Gpx3     | 25.424 | 1.496 | 1.588 |
| P46414 | Cyclin-dependent kinase inhibitor 1B                               | Cdkn1b   | 22.193 | 1.379 | 1.261 |
| P47915 | 60S ribosomal protein L29                                          | Rpl29    | 17.587 | 1.055 | 1.506 |
| P48760 | "Folylpolyglutamate synthase, mitochondrial                        | Fpgs     | 64.955 | 1.184 | 1.343 |
| P50543 | Protein S100-A11                                                   | S100a11  | 11.083 | 1.286 | 1.318 |
| P51670 | C-C motif chemokine 9                                              | Ccl9     | 13.871 | 0.957 | 2.014 |
| P52800 | Ephrin-B2                                                          | Efnb2    | 37.202 | 1.434 | 2.546 |

|        |                                                                         |          |        |       |       |
|--------|-------------------------------------------------------------------------|----------|--------|-------|-------|
| P54227 | Stathmin                                                                | Stmn1    | 17.274 | 0.665 | 0.747 |
| P54754 | Ephrin type-B receptor 3                                                | Ephb3    | 109.66 | 1.164 | 1.722 |
| P55050 | Fatty acid-binding protein                                              | Fabp2    | 15.126 | 0.747 | 0.817 |
| P55821 | Stathmin-2 OS=Mus musculus                                              | Stmn2    | 20.828 | 0.607 | 0.671 |
| P55937 | Golgin subfamily A member 3                                             | Golga3   | 167.22 | 1.125 | 1.337 |
| P58044 | Isopentenyl-diphosphate Delta-isomerase 1                               | Idi1     | 26.289 | 0.756 | 0.74  |
| P59326 | YTH domain-containing family protein 1                                  | Ythdf1   | 60.878 | 1.177 | 1.411 |
| P60904 | DnaJ homolog subfamily C member 5                                       | Dnajc5   | 22.101 | 1.257 | 1.377 |
| P61022 | Calcineurin B homologous protein 1                                      | Chp1     | 22.432 | 1.327 | 1.159 |
| P61961 | Ubiquitin-fold modifier 1                                               | Ufm1     | 9.1175 | 0.77  | 0.734 |
| P61965 | WD repeat-containing protein 5                                          | Wdr5     | 36.588 | 1.149 | 1.422 |
| P61971 | Nuclear transport factor 2                                              | Nutf2    | 14.478 | 0.811 | 0.767 |
| P62313 | U6 snRNA-associated Sm-like protein LSm6                                | Lsm6     | 9.1275 | 0.828 | 0.701 |
| P62342 | Thioredoxin reductase-like selenoprotein T                              | Selenot  | 22.292 | 1.39  | 1.128 |
| P62627 | Dynein light chain roadblock-type 1                                     | Dynlrb1  | 10.99  | 0.761 | 0.777 |
| P62858 | 40S ribosomal protein S28                                               | Rps28    | 7.8409 | 1.178 | 1.654 |
| P62984 | Ubiquitin-60S ribosomal protein L40                                     | Uba52    | 14.728 | 1.075 | 1.347 |
| P63166 | Small ubiquitin-related modifier 1                                      | Sumo1    | 11.557 | 1.073 | 1.855 |
| P63254 | Cysteine-rich protein 1                                                 | Crip1    | 8.5497 | 0.716 | 0.689 |
| P68037 | Ubiquitin-conjugating enzyme E2 L3                                      | Ube2l3   | 17.861 | 0.767 | 0.822 |
| P84228 | Histone H3.2                                                            | Hist1h3b | 15.388 | 1.096 | 1.721 |
| P84244 | Histone H3.3                                                            | H3f3a    | 15.328 | 1.305 | 1.869 |
| P97466 | Noggin                                                                  | Nog      | 25.77  | 1.285 | 2.294 |
| P97789 | 5'-3' exoribonuclease 1                                                 | Xrn1     | 194.31 | 1.284 | 1.763 |
| P97872 | Dimethylaniline monooxygenase [N-oxide-forming]<br>5                    | Fmo5     | 60     | 1.281 | 1.321 |
| Q01237 | 3-hydroxy-3-methylglutaryl-coenzyme A reductase                         | Hmgcr    | 97.039 | 1.401 | 1.105 |
| Q05793 | Basement membrane-specific heparan sulfate<br>proteoglycan core protein | Hspg2    | 398.29 | 1.332 | 1.434 |
| Q08879 | Fibulin-1                                                               | Fbln1    | 78.032 | 1.29  | 1.521 |
| Q31125 | Zinc transporter SLC39A7                                                | Slc39a7  | 50.656 | 1.236 | 1.396 |
| Q3TKY6 | Spliceosome-associated protein CWC27 homolog                            | Cwc27    | 53.542 | 0.757 | 0.775 |
| Q3TMQ6 | Angiogenin-4                                                            | Ang4     | 16.425 | 0.63  | 0.717 |
| Q3U1G5 | Interferon-stimulated 20 kDa exonuclease-like 2                         | Isg20l2  | 41.019 | 1.047 | 1.325 |
| Q3UMU9 | Hepatoma-derived growth factor-related protein 2                        | Hdgfl2   | 74.29  | 0.977 | 1.325 |
| Q3UUQ7 | GPI inositol-deacylase                                                  | Pgap1    | 104.58 | 1.305 | 1.186 |
| Q3UX10 | Tubulin alpha chain-like 3                                              | Tubal3   | 49.988 | 1.114 | 1.345 |
| Q45VN2 | Alpha-defensin 20                                                       | Defa20   | 10.601 | 0.713 | 0.854 |
| Q4VAE3 | Transmembrane protein 65                                                | Tmem65   | 24.918 | 1.415 | 1.358 |
| Q4ZJM7 | Otolin-1 OS=Mus musculus                                                | Otol1    | 49.6   | 1.284 | 2.128 |
| Q5G865 | Alpha-defensin 24                                                       | Defa24   | 10.327 | 1.449 | 2.702 |
| Q5I012 | Putative sodium-coupled neutral amino acid<br>transporter 10            | Slc38a10 | 117.19 | 1.113 | 1.374 |
| Q5SVR0 | TBC1 domain family member 9B                                            | Tbc1d9b  | 141.78 | 0.729 | 0.945 |

|        |                                                             |           |        |       |       |
|--------|-------------------------------------------------------------|-----------|--------|-------|-------|
| Q60592 | Microtubule-associated serine/threonine-protein kinase 2    | Mast2     | 190.53 | 1.51  | 1.458 |
| Q60722 | Transcription factor 4                                      | Tcf4      | 71.624 | 1.32  | 1.413 |
| Q60829 | Protein phosphatase 1 regulatory subunit 1B                 | Ppp1r1b   | 21.78  | 0.714 | 0.828 |
| Q61152 | Tyrosine-protein phosphatase non-receptor type 18           | Ptpn18    | 50.201 | 1.034 | 1.315 |
| Q61292 | Laminin subunit beta-2                                      | Lamb2     | 196.58 | 1.335 | 1.409 |
| Q61382 | TNF receptor-associated factor 4                            | Traf4     | 53.503 | 1.067 | 1.445 |
| Q61598 | Rab GDP dissociation inhibitor beta                         | Gdi2      | 50.537 | 0.754 | 0.804 |
| Q61749 | Translation initiation factor eIF-2B subunit delta          | Eif2b4    | 57.624 | 1.149 | 1.378 |
| Q62203 | Splicing factor 3A subunit 2                                | Sf3a2     | 49.911 | 1.078 | 1.722 |
| Q62241 | U1 small nuclear ribonucleoprotein C                        | Snrpc     | 17.364 | 0.723 | 0.931 |
| Q62266 | Cornifin-A OS=Mus musculus                                  | Sprr1a    | 15.765 | 1.498 | 1.214 |
| Q62273 | Sulfate transporter                                         | Slc26a2   | 81.603 | 1.29  | 1.489 |
| Q62313 | Trans-Golgi network integral membrane protein 1             | Tgoln1    | 37.848 | 1.32  | 1.398 |
| Q62388 | Serine-protein kinase ATM                                   | Atm       | 349.41 | 1.068 | 1.427 |
| Q62392 | Pleckstrin homology-like domain family A member 1           | Phlda1    | 45.582 | 1.403 | 1.203 |
| Q62395 | Trefoil factor 3 OS=Mus musculus                            | Tff3      | 8.8081 | 0.728 | 0.866 |
| Q62452 | UDP-glucuronosyltransferase 1-9                             | Ugt1a9    | 60.007 | 1.338 | 1.626 |
| Q64435 | UDP-glucuronosyltransferase 1-6                             | Ugt1a6    | 60.438 | 1.213 | 1.308 |
| Q64458 | Cytochrome P450 2C29                                        | Cyp2c29   | 55.715 | 1.286 | 1.376 |
| Q64459 | Cytochrome P450 3A11                                        | Cyp3a11   | 57.854 | 1.528 | 1.662 |
| Q64464 | Cytochrome P450 3A13                                        | Cyp3a13   | 57.492 | 1.428 | 1.29  |
| Q66JX5 | FGFR1 oncogene partner                                      | Fgfr1op   | 42.758 | 0.722 | 0.889 |
| Q689Z5 | Protein strawberry notch homolog 1                          | Sbno1     | 153.74 | 1.044 | 1.412 |
| Q6NVG1 | Lysophospholipid acyltransferase LPCAT4                     | Lpcat4    | 57.143 | 1.44  | 1.219 |
| Q6PDH0 | Pleckstrin homology-like domain family B member 1           | Phldb1    | 150.07 | 0.621 | 0.558 |
| Q6PGC1 | ATP-dependent RNA helicase DHX29                            | Dhx29     | 153.97 | 1.247 | 1.635 |
| Q6PHN9 | Ras-related protein Rab-35 OS=Mus musculus                  | Rab35     | 23.025 | 1.236 | 1.347 |
| Q6PIJ4 | Nuclear factor related to kappa-B-binding protein           | Nfrkb     | 138.76 | 1.125 | 1.673 |
| Q6ZQ06 | Centrosomal protein of 162 kDa                              | Cep162    | 160.85 | 1.088 | 2.187 |
| Q6ZQF0 | DNA topoisomerase 2-binding protein 1                       | Topbp1    | 168.86 | 1.271 | 1.31  |
| Q6ZWY9 | Histone H2B type 1-C/E/G                                    | Hist1h2bc | 13.906 | 1.383 | 4.136 |
| Q71KT5 | Delta(14)-sterol reductase                                  | Tm7sf2    | 46.52  | 1.489 | 1.611 |
| Q71LX4 | Talin-2 OS=Mus musculus                                     | Tln2      | 253.62 | 1.024 | 1.663 |
| Q76KJ5 | DNA-directed RNA polymerase I subunit RPA34 OS=Mus musculus | Cd3eap    | 43.082 | 0.977 | 1.393 |
| Q78IK2 | Up-regulated during skeletal muscle growth protein 5        | Usmg5     | 6.3814 | 1.429 | 1.374 |
| Q791T5 | Mitochondrial carrier homolog 1                             | Mtch1     | 41.565 | 1.198 | 2.201 |
| Q7TNS2 | MICOS complex subunit Mic10                                 | Minos1    | 8.5669 | 1.496 | 1.349 |
| Q7TT45 | Ras-related GTP-binding protein D                           | Rragd     | 51.232 | 1.206 | 1.545 |
| Q80T69 | Lysine-specific demethylase 9                               | Rsbm1     | 89.25  | 1.466 | 1.23  |

|        |                                                          |          |        |       |       |
|--------|----------------------------------------------------------|----------|--------|-------|-------|
| Q80TE0 | RNA polymerase II-associated protein 1                   | Rpap1    | 155.27 | 1.275 | 1.806 |
| Q80U49 | Centrosomal protein of 170 kDa protein B                 | Cep170b  | 170.82 | 1.087 | 1.358 |
| Q80WQ6 | Inactive rhomboid protein 2                              | Rhbdf2   | 93.433 | 1.102 | 1.414 |
| Q80X80 | Phospholipid transfer protein C2CD2L                     | C2cd2l   | 76.328 | 1.376 | 1.385 |
| Q80YT7 | Myomegalin                                               | Pde4dip  | 250.63 | 1.584 | 1.494 |
| Q80ZM8 | Cardiolipin synthase (CMP-forming)                       | Crsl1    | 32.502 | 1.219 | 1.308 |
| Q80ZW2 | Protein THEM6                                            | Them6    | 23.802 | 1.4   | 1.385 |
| Q8BG73 | SH3 domain-binding glutamic acid-rich-like protein 2     | Sh3bgrl2 | 12.255 | 0.86  | 0.753 |
| Q8BH59 | Calcium-binding mitochondrial carrier protein Aralar1    | Slc25a12 | 74.569 | 1.297 | 1.343 |
| Q8BHE8 | "m-AAA protease-interacting protein 1, mitochondrial     | Maip1    | 32.985 | 1.412 | 1.37  |
| Q8BHG2 | UPF0587 protein C1orf123 homolog                         | ---      | 18.02  | 0.768 | 0.85  |
| Q8BHL4 | Retinoic acid-induced protein 3                          | Gprc5a   | 40.1   | 1.51  | 1.204 |
| Q8BIG7 | Catechol O-methyltransferase domain-containing protein 1 | Comtd1   | 28.96  | 1.346 | 1.17  |
| Q8BJ03 | Cytochrome c oxidase assembly protein COX15 homolog      | Cox15    | 45.852 | 1.317 | 1.144 |
| Q8BMD8 | Calcium-binding mitochondrial carrier protein SCA1       | Slc25a24 | 52.901 | 1.367 | 1.24  |
| Q8BND5 | Sulfhydryl oxidase 1                                     | Qsox1    | 82.784 | 0.757 | 0.844 |
| Q8BNU0 | Armadillo repeat-containing protein 6                    | Armc6    | 50.683 | 1.303 | 1.705 |
| Q8BNW9 | Kelch repeat and BTB domain-containing protein 11        | Kbtbd11  | 67.945 | 1.227 | 1.331 |
| Q8BP92 | Reticulocalbin-2                                         | Rcn2     | 37.27  | 1.26  | 1.407 |
| Q8BQZ4 | Ral GTPase-activating protein subunit beta               | Ralgapb  | 165.2  | 1.232 | 1.738 |
| Q8BTU1 | Cilia- and flagella-associated protein 20                | Cfap20   | 22.748 | 1.06  | 1.327 |
| Q8BTW3 | Exosome complex component MTR3                           | Exosc6   | 28.37  | 1.244 | 1.937 |
| Q8BW75 | Amine oxidase [flavin-containing] B OS=Mus musculus      | Maob     | 58.557 | 1.377 | 1.287 |
| Q8BWQ1 | UDP-glucuronosyltransferase 2A3                          | Ugt2a3   | 61.119 | 1.337 | 1.306 |
| Q8BZR9 | Nuclear cap-binding protein subunit 3                    | Ncbp3    | 70.042 | 1.312 | 1.568 |
| Q8C3B8 | Protein RFT1 homolog                                     | Rft1     | 60.303 | 1.24  | 1.368 |
| Q8C4V1 | Rho GTPase-activating protein 24                         | Arhgap24 | 84.099 | 0.809 | 1.663 |
| Q8C561 | LMBR1 domain-containing protein 2                        | Lmbrd2   | 81.1   | 1.293 | 1.335 |
| Q8C5T8 | Coiled-coil domain-containing protein 113                | Ccdc113  | 44.214 | 0.876 | 0.761 |
| Q8CD91 | SPARC-related modular calcium-binding protein 2          | Smoc2    | 49.891 | 0.873 | 1.421 |
| Q8CGA0 | Protein phosphatase 1F                                   | Ppm1f    | 49.61  | 0.665 | 0.975 |
| Q8CHP8 | Glycerol-3-phosphate phosphatase                         | Pgp      | 34.54  | 0.757 | 0.835 |
| Q8CIM7 | Cytochrome P450 2D26                                     | Cyp2d26  | 56.975 | 1.215 | 1.359 |
| Q8JZL7 | Ras-GEF domain-containing family member 1B               | Rasgef1b | 55.273 | 1.201 | 1.425 |
| Q8JZR0 | Long-chain-fatty-acid--CoA ligase 5                      | Acs15    | 76.205 | 1.316 | 1.306 |
| Q8K072 | Receptor expression-enhancing protein 4                  | Reep4    | 29.69  | 1.194 | 1.43  |
| Q8K0C5 | Zymogen granule membrane protein 16                      | Zgl16    | 18.209 | 1.48  | 1.314 |

|        |                                                                                                          |           |        |       |       |
|--------|----------------------------------------------------------------------------------------------------------|-----------|--------|-------|-------|
| Q8K0E3 | Sodium/myo-inositol cotransporter 2                                                                      | Slc5a11   | 73.797 | 1.165 | 1.305 |
| Q8K0E8 | Fibrinogen beta chain                                                                                    | Fgb       | 54.752 | 1.419 | 1.493 |
| Q8K296 | Myotubularin-related protein 3                                                                           | Mtmr3     | 133.84 | 0.909 | 1.402 |
| Q8K2C9 | Very-long-chain (3R)-3-hydroxyacyl-CoA dehydratase 3                                                     | Hacd3     | 43.131 | 1.31  | 1.379 |
| Q8K3Z0 | Nucleotide-binding oligomerization domain-containing protein 2                                           | Nod2      | 113.56 | 0.692 | 0.679 |
| Q8R003 | Muscleblind-like protein 3                                                                               | Mbnl3     | 37.57  | 1.156 | 1.497 |
| Q8R1M8 | Mucosal pentraxin                                                                                        | Mptx1     | 24.538 | 1.307 | 1.236 |
| Q8R2K1 | Fucose mutarotase                                                                                        | Fuom      | 16.805 | 0.766 | 0.72  |
| Q8R3P6 | Integrator complex subunit 14                                                                            | Ints14    | 57.236 | 1.292 | 1.384 |
| Q8R4D5 | Transient receptor potential cation channel subfamily M member 8                                         | Trpm8     | 127.71 | 0.992 | 2.019 |
| Q8VCM7 | Fibrinogen gamma chain                                                                                   | Fgg       | 49.391 | 1.366 | 1.378 |
| Q8VED9 | Galectin-related protein                                                                                 | Lgalsl    | 18.955 | 1.274 | 1.718 |
| Q8VHG0 | Dimethylaniline monooxygenase [N-oxide-forming] 4                                                        | Fmo4      | 63.791 | 1.328 | 1.268 |
| Q8VHK1 | Caskin-2                                                                                                 | Caskin2   | 126.78 | 1.109 | 1.786 |
| Q91V04 | Translocating chain-associated membrane protein 1                                                        | Tram1     | 43.039 | 1.249 | 1.349 |
| Q91V76 | Ester hydrolase C11orf54 homolog                                                                         | ---       | 34.995 | 0.8   | 0.763 |
| Q91W97 | Putative hexokinase HKDC1                                                                                | Hkdc1     | 102.26 | 1.365 | 1.25  |
| Q91WE4 | UPF0729 protein C18orf32 homolog                                                                         | ---       | 8.0355 | 1.485 | 2.253 |
| Q91WP6 | Serine protease inhibitor A3N                                                                            | Serpina3n | 46.717 | 1.605 | 1.586 |
| Q91XB7 | Protein YIF1A                                                                                            | Yif1a     | 32.134 | 1.384 | 1.404 |
| Q91Y74 | "CMP-N-acetylneuraminase-beta-galactosamide-alpha-2,3-sialyltransferase 4                                | St3gal4   | 38.058 | 1.429 | 1.198 |
| Q91ZF2 | Cathepsin 7                                                                                              | Cts7      | 37.724 | 1.398 | 1.782 |
| Q921I1 | Serotransferrin                                                                                          | Tf        | 76.723 | 1.277 | 1.36  |
| Q921U8 | Smoothelin                                                                                               | Smtn      | 100.29 | 1.376 | 1.889 |
| Q923S9 | Ras-related protein Rab-30                                                                               | Rab30     | 23.058 | 1.615 | 1.409 |
| Q93092 | Transaldolase                                                                                            | Taldo1    | 37.387 | 0.755 | 0.742 |
| Q99JR5 | Tubulointerstitial nephritis antigen-like                                                                | Tinagl1   | 52.664 | 1.455 | 1.4   |
| Q99LH1 | Nucleolar GTP-binding protein 2                                                                          | Gnl2      | 83.345 | 1.006 | 1.419 |
| Q99LJ0 | CTTNBP2 N-terminal-like protein                                                                          | Cttnbp2nl | 69.84  | 1.085 | 1.339 |
| Q99LX0 | Protein/nucleic acid deglycase DJ-1                                                                      | Park7     | 20.021 | 0.722 | 0.794 |
| Q99MI1 | ELKS/Rab6-interacting/CAST family member 1                                                               | Erc1      | 128.33 | 1.014 | 1.497 |
| Q99PG0 | Arylacetamide deacetylase                                                                                | Aadac     | 45.25  | 1.303 | 1.19  |
| Q9CQC2 | Colipase OS=Mus musculus                                                                                 | Clps      | 12.444 | 0.608 | 0.747 |
| Q9CQD1 | Ras-related protein Rab-5A                                                                               | Rab5a     | 23.598 | 1.329 | 1.5   |
| Q9CQJ8 | NADH dehydrogenase [ubiquinone] 1 beta subcomplex subunit 9 OS=Mus musculus OX=10090 GN=Ndufb9 PE=1 SV=3 | Ndufb9    | 21.984 | 1.317 | 1.27  |
| Q9CQM2 | ER lumen protein-retaining receptor 2                                                                    | Kdelr2    | 24.454 | 1.353 | 3.241 |
| Q9CQS5 | Serine/threonine-protein kinase RIO2                                                                     | Rio2      | 62.49  | 1.175 | 2.177 |

|        |                                                                         |          |        |       |       |
|--------|-------------------------------------------------------------------------|----------|--------|-------|-------|
| Q9CQT2 | RNA-binding protein 7                                                   | Rbm7     | 30.148 | 1.059 | 1.405 |
| Q9CR62 | Mitochondrial 2-oxoglutarate/malate carrier protein                     | Slc25a11 | 34.155 | 1.352 | 1.277 |
| Q9CWK3 | CD2 antigen cytoplasmic tail-binding protein 2                          | Cd2bp2   | 37.694 | 0.995 | 1.419 |
| Q9CWV6 | PRKR-interacting protein 1                                              | Prkrip1  | 21.491 | 1.159 | 1.654 |
| Q9CWY9 | RPA-interacting protein                                                 | Rpain    | 24.897 | 1.557 | 2.202 |
| Q9CXY6 | Interleukin enhancer-binding factor 2                                   | Ilf2     | 43.062 | 0.755 | 0.789 |
| Q9CY57 | Chromatin target of PRMT1 protein                                       | Chtop    | 26.585 | 0.753 | 0.842 |
| Q9CYH2 | Redox-regulatory protein FAM213A                                        | Fam213a  | 24.394 | 1.404 | 1.414 |
| Q9D032 | Single-stranded DNA-binding protein 3                                   | Ssbp3    | 40.421 | 1.225 | 1.333 |
| Q9D136 | 2-oxoglutarate and iron-dependent oxygenase domain-containing protein 3 | Ogfod3   | 35.384 | 1.273 | 1.559 |
| Q9D1I2 | Caspase recruitment domain-containing protein 19                        | Card19   | 20.936 | 1.348 | 1.349 |
| Q9D1J1 | Adaptin ear-binding coat-associated protein 2                           | Necap2   | 28.598 | 0.968 | 1.591 |
| Q9D1N9 | "39S ribosomal protein L21, mitochondrial                               | Mrpl21   | 23.366 | 1.019 | 1.38  |
| Q9D2L9 | Protein FAM111A                                                         | Fam111a  | 69.948 | 1.137 | 1.309 |
| Q9D2Q2 | Probable tRNA (uracil-O(2)-)-methyltransferase                          | Trmt44   | 79.835 | 1.257 | 1.399 |
| Q9D379 | Epoxide hydrolase 1                                                     | Ephx1    | 52.576 | 1.318 | 1.336 |
| Q9D6M3 | Mitochondrial glutamate carrier 1                                       | Slc25a22 | 34.67  | 1.112 | 1.487 |
| Q9D7S0 | Ly6/PLAUR domain-containing protein 8                                   | Lypd8    | 27.524 | 0.713 | 0.684 |
| Q9DB90 | Protein SMG9                                                            | Smg9     | 57.62  | 1.035 | 1.372 |
| Q9DBC3 | Cap-specific mRNA (nucleoside-2'-O)-methyltransferase 1                 | Cmtr1    | 95.675 | 0.667 | 0.933 |
| Q9DBM1 | G patch domain-containing protein 1                                     | Gpatch1  | 103.01 | 1.045 | 1.308 |
| Q9DBT3 | Coiled-coil domain-containing protein 97                                | Ccdc97   | 38.724 | 1.235 | 1.477 |
| Q9DBY1 | E3 ubiquitin-protein ligase synoviolin                                  | Syvn1    | 67.296 | 1.419 | 2.27  |
| Q9DCF9 | Translocon-associated protein subunit gamma                             | Ssr3     | 21.064 | 1.32  | 2.09  |
| Q9DCS9 | NADH dehydrogenase [ubiquinone] 1 beta subcomplex subunit 10            | Ndufb10  | 21.024 | 1.43  | 1.319 |
| Q9DCT5 | Stromal cell-derived factor 2                                           | Sdf2     | 23.159 | 1.715 | 2.419 |
| Q9EP75 | Leukotriene-B4 omega-hydroxylase 3                                      | Cyp4f14  | 59.8   | 1.388 | 1.328 |
| Q9EPB4 | Apoptosis-associated speck-like protein containing a CARD               | Pycard   | 21.458 | 0.72  | 0.728 |
| Q9EPS3 | D-glucuronyl C5-epimerase                                               | Glce     | 70.088 | 1.303 | 1.298 |
| Q9EQ06 | Estradiol 17-beta-dehydrogenase 11                                      | Hsd17b11 | 32.88  | 1.363 | 1.371 |
| Q9JKP5 | Muscleblind-like protein 1                                              | Mbnl1    | 36.975 | 1.203 | 1.534 |
| Q9JLJ1 | Selenoprotein K                                                         | Selenok  | 10.642 | 1.426 | 1.302 |
| Q9JLJ5 | Elongation of very long chain fatty acids protein 1                     | Elov11   | 32.677 | 1.637 | 2.101 |
| Q9JM52 | Misshapen-like kinase 1                                                 | Mink1    | 147.29 | 1.213 | 1.663 |
| Q9QXD8 | LIM domain-containing protein 1                                         | Limd1    | 71.421 | 1.248 | 1.831 |
| Q9QY14 | DnaJ homolog subfamily B member 12                                      | Dnajb12  | 41.987 | 1.331 | 1.616 |
| Q9QZI9 | Serine incorporator 3                                                   | Serinc3  | 52.622 | 1.127 | 1.55  |
| Q9QZR0 | E3 ubiquitin-protein ligase RNF25                                       | Rnf25    | 51.226 | 0.737 | 0.794 |
| Q9R0B9 | "Procollagen-lysine,2-oxoglutarate 5-dioxygenase 2                      | Plod2    | 84.487 | 1.421 | 1.469 |
| Q9R0E1 | "Procollagen-lysine,2-oxoglutarate 5-dioxygenase 3                      | Plod3    | 84.921 | 1.298 | 1.306 |

|        |                                                       |          |        |       |       |
|--------|-------------------------------------------------------|----------|--------|-------|-------|
| Q9R0Q3 | Transmembrane emp24 domain-containing protein 2       | Tmed2    | 22.705 | 1.259 | 1.333 |
| Q9R0U0 | Serine/arginine-rich splicing factor 10               | Srsf10   | 31.3   | 1.127 | 1.345 |
| Q9WTI7 | Unconventional myosin-Ic                              | Myo1c    | 121.94 | 1.335 | 1.267 |
| Q9WUZ9 | Ectonucleoside triphosphate diphosphohydrolase 5      | Entpd5   | 47.101 | 1.247 | 1.318 |
| Q9WVQ5 | Methylthioribulose-1-phosphate dehydratase            | Apip     | 26.949 | 0.754 | 0.914 |
| Q9Z1S5 | Neuronal-specific septin-3                            | Sept3    | 40.037 | 0.75  | 1.118 |
| Q9Z247 | Peptidyl-prolyl cis-trans isomerase FKBP9             | Fkbp9    | 62.995 | 1.388 | 1.373 |
| Q9Z2A7 | Diacylglycerol O-acyltransferase 1                    | Dgat1    | 56.789 | 1.253 | 1.406 |
| Q9Z2G0 | Protein fem-1 homolog B                               | Fem1b    | 70.222 | 1.49  | 1.777 |
| Q9Z2Z6 | Mitochondrial carnitine/acylcarnitine carrier protein | Slc25a20 | 33.026 | 1.318 | 1.194 |
