# Supplementary material for: TMT-Based Quantitative Proteomic Analysis of Intestinal Organoids Infected by Listeria monocytogenes Strains with Different Virulence
Source: MDPI journal article supplement (doi:10.3390/ijms23116231), 2022-06-02
Supplement: s1 [file s1]

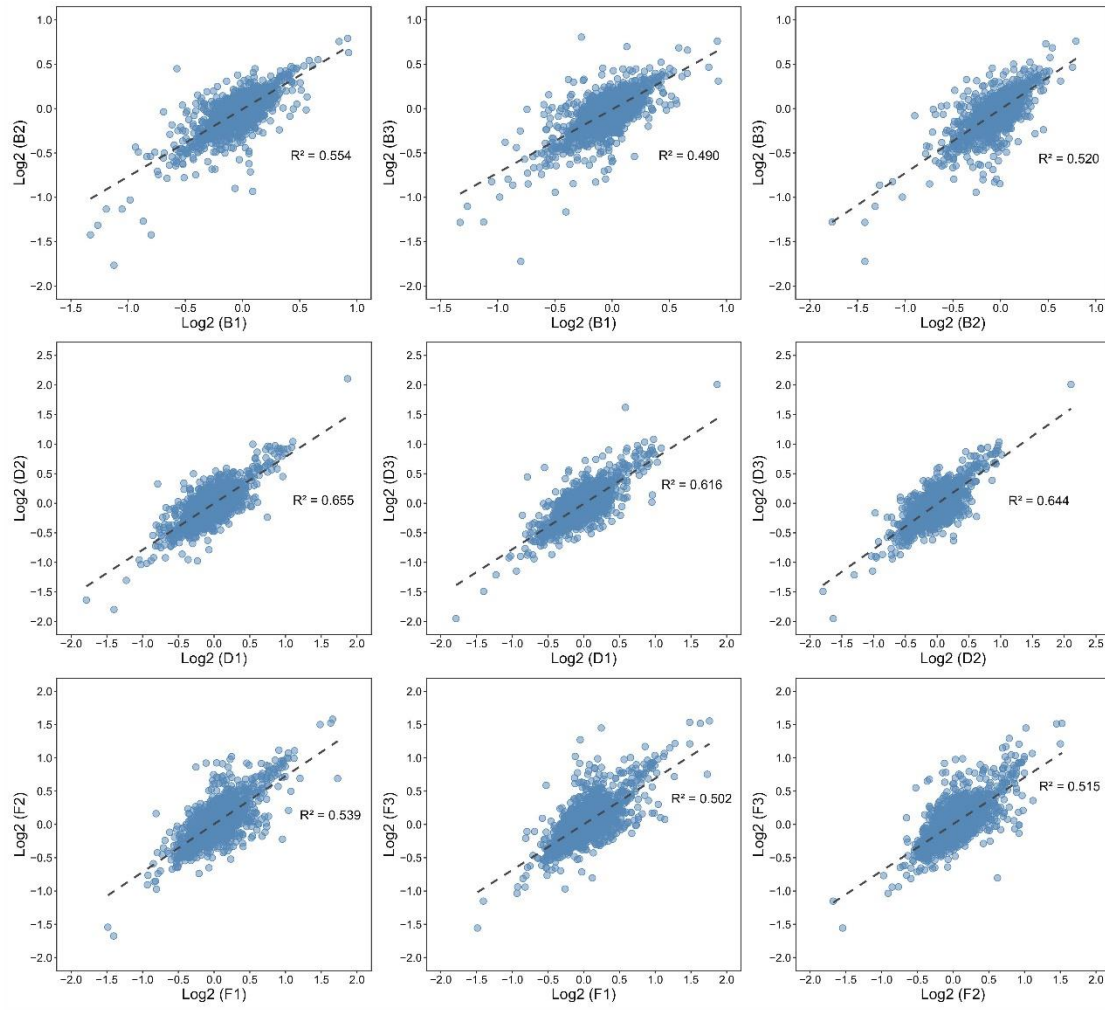

**Figure S1 Scatter plots with three biological replicates among each other. B:**  
Control; D: *L. monocytogenes* 10403s; F: *L. monocytogenes* M7.
