# Supplementary material for: TMT-Based Quantitative Proteomic Analysis of Intestinal Organoids Infected by Listeria monocytogenes Strains with Different Virulence
Source: Int J Mol Sci. 2022 Jun 2;23(11):6231. doi: 10.3390/ijms23116231 (PMC9181811; doi:10.3390/ijms23116231)
Supplement: Supplementary file 1 [file ijms-23-06231-s001.zip › Table S1 Protein identification and quantification by proteomics.xlsx]

## Sheet: Sheet1
				Control（B）			Lm10403s(D)			Lm M7(F)
Protein accession	Protein description	Gene name	MW [kDa]	control2	control3	control1	Lm10403s2	Lm10403s3	Lm10403s1	Lm M72	Lm M73	Lm M71
Q5SUQ9	CST complex subunit CTC1 OS=Mus musculus OX=10090 GN=Ctc1 PE=1 SV=2	Ctc1	134.03		0.922	0.858		1.019	0.712		1.067	0.67
Q9JKB1	Ubiquitin carboxyl-terminal hydrolase isozyme L3 OS=Mus musculus OX=10090 GN=Uchl3 PE=1 SV=2	Uchl3	26.151	1.017	1.009	1.086	0.83	0.841	0.846	0.899	0.887	0.838
P49722	Proteasome subunit alpha type-2 OS=Mus musculus OX=10090 GN=Psma2 PE=1 SV=3	Psma2	25.926	0.994	1.007	1.037	0.893	0.885	0.882	0.91	0.893	0.988
Q5DU57	Spermatogenesis-associated protein 13 OS=Mus musculus OX=10090 GN=Spata13 PE=1 SV=2	Spata13	75.256		0.928			0.881			1.07
P31266	Recombining binding protein suppressor of hairless OS=Mus musculus OX=10090 GN=Rbpj PE=1 SV=1	Rbpj	58.537			0.986			1.155			1.12
Q6ZQ06	Centrosomal protein of 162 kDa OS=Mus musculus OX=10090 GN=Cep162 PE=1 SV=2	Cep162	160.85		1.317	1.576		1.71	1.439		2.94	3.386
Q9R0T8	Inhibitor of nuclear factor kappa-B kinase subunit epsilon OS=Mus musculus OX=10090 GN=Ikbke PE=1 SV=2	Ikbke	80.952			0.912			0.897			0.881
Q9JI39	ATP-binding cassette sub-family B member 10, mitochondrial OS=Mus musculus OX=10090 GN=Abcb10 PE=1 SV=1	Abcb10	77.187	0.973	0.954		1.097	1.061		0.975	0.968
Q8K135	Dyslexia-associated protein KIAA0319-like protein OS=Mus musculus OX=10090 GN=Kiaa0319l PE=1 SV=1	Kiaa0319l	115.31	0.887	0.792	0.821	0.894	1.103	1.038	0.947	0.956	0.965
Q5U4C3	Splicing factor, arginine/serine-rich 19 OS=Mus musculus OX=10090 GN=Scaf1 PE=1 SV=1	Scaf1	133.84	1.024	1.102	1.024	0.999	1.426	1.215	1.027	1.067	1.117
P01101	Proto-oncogene c-Fos OS=Mus musculus OX=10090 GN=Fos PE=1 SV=1	Fos	40.838
Q8BK08	Transmembrane protein 11, mitochondrial OS=Mus musculus OX=10090 GN=Tmem11 PE=1 SV=1	Tmem11	21.311	0.821	1.045	0.93	1.107	1.039	1.165	1.22	1.078	1.062
Q99PV0	Pre-mRNA-processing-splicing factor 8 OS=Mus musculus OX=10090 GN=Prpf8 PE=1 SV=2	Prpf8	273.61	0.986	1.016	1.005	1.098	1.079	1.102	1.057	1.035	1.028
P84084	ADP-ribosylation factor 5 OS=Mus musculus OX=10090 GN=Arf5 PE=1 SV=2	Arf5	20.529		0.859	0.897		0.97	0.997		0.969	0.936
Q8R3K3	Pentatricopeptide repeat-containing protein 2, mitochondrial OS=Mus musculus OX=10090 GN=Ptcd2 PE=1 SV=1	Ptcd2	43.843	1.007	1.063	0.973	1.07	1.021	1.042	1.012	1.048	1.039
Q91UZ5	Inositol monophosphatase 2 OS=Mus musculus OX=10090 GN=Impa2 PE=1 SV=1	Impa2	31.716	0.942	1.055	1.333	0.931	0.865	0.648	0.847	0.93	0.621
P35585	AP-1 complex subunit mu-1 OS=Mus musculus OX=10090 GN=Ap1m1 PE=1 SV=3	Ap1m1	48.542			1.152			1.033			1.204
P17751	Triosephosphate isomerase OS=Mus musculus OX=10090 GN=Tpi1 PE=1 SV=4	Tpi1	32.191	0.964	0.956	0.973	0.795	0.797	0.82	0.733	0.762	0.822
Q9Z1M4	Ribosomal protein S6 kinase beta-2 OS=Mus musculus OX=10090 GN=Rps6kb2 PE=1 SV=1	Rps6kb2	53.538	0.97			1.129			1.207
Q8BHB4	WD repeat-containing protein 3 OS=Mus musculus OX=10090 GN=Wdr3 PE=1 SV=1	Wdr3	105.77	1.028	1.049	1.056	1.112	1.052	1.131	1.065	1.155	1.069
Q9DCS9	NADH dehydrogenase [ubiquinone] 1 beta subcomplex subunit 10 OS=Mus musculus OX=10090 GN=Ndufb10 PE=1 SV=3	Ndufb10	21.024	0.84	0.841	0.827	1.182	1.115	1.289	1.057	1.127	1.124
Q78IK4	MICOS complex subunit Mic27 OS=Mus musculus OX=10090 GN=Apool PE=1 SV=1	Apool	29.26	0.941	0.915	0.925	1.042	0.976	1.038	0.945	0.812	0.968
Q8BSS9	Liprin-alpha-2 OS=Mus musculus OX=10090 GN=Ppfia2 PE=1 SV=2	Ppfia2	143.23
Q9CQN1	Heat shock protein 75 kDa, mitochondrial OS=Mus musculus OX=10090 GN=Trap1 PE=1 SV=1	Trap1	80.208	0.959	0.97	0.972	0.982	0.983	0.997	0.972	1.017	1.023
A2ASZ8	Calcium-binding mitochondrial carrier protein SCaMC-2 OS=Mus musculus OX=10090 GN=Slc25a25 PE=1 SV=1	Slc25a25	52.62			0.985			1.107			1.021
Q9DB15	39S ribosomal protein L12, mitochondrial OS=Mus musculus OX=10090 GN=Mrpl12 PE=1 SV=2	Mrpl12	21.708	0.926	1.016	1.028	0.857	0.865	0.854	0.912	0.886	0.876
Q9D385	ADP-ribosylation factor-like protein 2-binding protein OS=Mus musculus OX=10090 GN=Arl2bp PE=1 SV=1	Arl2bp	18.754	1.014	0.962		0.928	0.891		1.024	1.03
Q3TWL2	Type 1 phosphatidylinositol 4,5-bisphosphate 4-phosphatase OS=Mus musculus OX=10090 GN=Pip4p1 PE=1 SV=1	Pip4p1	30.047
P97762	Retinitis pigmentosa 9 protein homolog OS=Mus musculus OX=10090 GN=rp9 PE=1 SV=1	rp9	25.261
Q6P3Z3	THAP domain-containing protein 4 OS=Mus musculus OX=10090 GN=Thap4 PE=1 SV=1	Thap4	62.57	1.035			0.929			1.02
P0CG49	Polyubiquitin-B OS=Mus musculus OX=10090 GN=Ubb PE=2 SV=1	Ubb	34.368
Q01237	3-hydroxy-3-methylglutaryl-coenzyme A reductase OS=Mus musculus OX=10090 GN=Hmgcr PE=1 SV=3	Hmgcr	97.039	1.016	1.078	0.994	1.421	1.436	1.47	1.158	1.13	1.125
O88396	GrpE protein homolog 2, mitochondrial OS=Mus musculus OX=10090 GN=Grpel2 PE=2 SV=2	Grpel2	25.029	0.985	0.944	0.971	1.174	1.129	1.142	0.932	0.982	1.015
Q9WTJ4	Flt3-interacting zinc finger protein 1 OS=Mus musculus OX=10090 GN=Fiz1 PE=1 SV=1	Fiz1	52.685
Q9D7A8	Armadillo repeat-containing protein 1 OS=Mus musculus OX=10090 GN=Armc1 PE=1 SV=1	Armc1	31.246	0.989	1.07	0.989	1.04	1.017	0.956	1.037	0.979	0.977
O35054	Claudin-4 OS=Mus musculus OX=10090 GN=Cldn4 PE=1 SV=1	Cldn4	22.338	0.675	0.728		1.659	1.588		1.852	1.71
P68254	14-3-3 protein theta OS=Mus musculus OX=10090 GN=Ywhaq PE=1 SV=1	Ywhaq	27.778	1.034	1.008	1.003	0.914	0.983	0.872	0.97	0.943	0.827
P03921	NADH-ubiquinone oxidoreductase chain 5 OS=Mus musculus OX=10090 GN=Mtnd5 PE=1 SV=3	Mtnd5	68.474		1.199			1.191			1.176
Q9Z2W1	Serine/threonine-protein kinase 25 OS=Mus musculus OX=10090 GN=Stk25 PE=1 SV=2	Stk25	48.157	1.001	1.061	0.959	1.216	1.144	1.065	0.97	1.016	1.022
Q921X6	DNA-directed RNA polymerase III subunit RPC6 OS=Mus musculus OX=10090 GN=Polr3f PE=1 SV=1	Polr3f	35.652	1.147	1.054		0.95	1.028		0.933	1.114
O54784	Death-associated protein kinase 3 OS=Mus musculus OX=10090 GN=Dapk3 PE=1 SV=1	Dapk3	51.421	1.031	1.015	1.021	0.997	1.043	1.057	1.085	0.995	1.093
Q8BK48	Pyrethroid hydrolase Ces2e OS=Mus musculus OX=10090 GN=Ces2e PE=1 SV=1	Ces2e	62.317	0.85	0.84	0.832	0.821	0.865	0.885	0.869	0.928	0.913
Q9D7N9	Adipocyte plasma membrane-associated protein OS=Mus musculus OX=10090 GN=Apmap PE=1 SV=1	Apmap	46.434	0.927	0.931	0.937	1.116	1.123	1.164	1.049	1.029	0.999
P47941	Crk-like protein OS=Mus musculus OX=10090 GN=Crkl PE=1 SV=2	Crkl	33.83	0.961	1.007	0.964	0.916	0.891	0.966	1.076	0.953	1.014
Q80VC6	tRNA selenocysteine 1-associated protein 1 OS=Mus musculus OX=10090 GN=Trnau1ap PE=1 SV=2	Trnau1ap	32.423	1.044			1.121			1.192
O35400	Sulfotransferase family cytosolic 2B member 1 OS=Mus musculus OX=10090 GN=Sult2b1 PE=2 SV=2	Sult2b1	38.347	0.887	0.914	0.9	1.191	1.032	1.051	1.032	0.886	0.949
Q8VCH0	3-ketoacyl-CoA thiolase B, peroxisomal OS=Mus musculus OX=10090 GN=Acaa1b PE=1 SV=1	Acaa1b	43.995
Q9R257	Heme-binding protein 1 OS=Mus musculus OX=10090 GN=Hebp1 PE=1 SV=2	Hebp1	21.067
Q3TSG4	RNA demethylase ALKBH5 OS=Mus musculus OX=10090 GN=Alkbh5 PE=1 SV=2	Alkbh5	44.41	0.956	1.106	1.094	0.878	0.974	1.056	0.878	1.04	0.96
Q8VDM1	Zinc finger CCCH-type with G patch domain-containing protein OS=Mus musculus OX=10090 GN=Zgpat PE=1 SV=1	Zgpat	56.41		1.039	1.038		0.879	0.882		0.907	1.061
O09117	Synaptophysin-like protein 1 OS=Mus musculus OX=10090 GN=Sypl1 PE=1 SV=2	Sypl1	28.899	0.771	0.895	0.902	0.996	1.061	1.023	1.269	0.974	0.963
Q6ZWZ2	Ubiquitin-conjugating enzyme E2 R2 OS=Mus musculus OX=10090 GN=Ube2r2 PE=1 SV=1	Ube2r2	27.166		0.973	1.015		0.846	1.04		1.053	1.053
Q9WU40	Inner nuclear membrane protein Man1 OS=Mus musculus OX=10090 GN=Lemd3 PE=1 SV=2	Lemd3	100.31	1.082		1.034	0.664		0.82	1.123		0.975
O70514	Fibroblast growth factor-binding protein 1 OS=Mus musculus OX=10090 GN=Fgfbp1 PE=1 SV=1	Fgfbp1	28.294
Q91ZH7	Phospholipase ABHD3 OS=Mus musculus OX=10090 GN=Abhd3 PE=1 SV=1	Abhd3	46.232
Q8CAF4	NHS-like protein 1 OS=Mus musculus OX=10090 GN=Nhsl1 PE=1 SV=3	Nhsl1	169.42		0.89			1.103			1.291
Q9D0K2	Succinyl-CoA:3-ketoacid coenzyme A transferase 1, mitochondrial OS=Mus musculus OX=10090 GN=Oxct1 PE=1 SV=1	Oxct1	55.988	0.998	1.005	1.003	1.002	0.996	0.987	1.063	1.089	1.113
Q8VCC2	Liver carboxylesterase 1 OS=Mus musculus OX=10090 GN=Ces1 PE=1 SV=1	Ces1	62.679	0.905		0.832	0.978		0.863	1.044		0.793
Q8BKT8	HAUS augmin-like complex subunit 7 OS=Mus musculus OX=10090 GN=Haus7 PE=1 SV=2	Haus7	40.656		1.066			1.156			1.079
O54782	Epididymis-specific alpha-mannosidase OS=Mus musculus OX=10090 GN=Man2b2 PE=1 SV=2	Man2b2	115.61			0.992			1.019			1.225
Q8BWY7	Zinc transporter ZIP11 OS=Mus musculus OX=10090 GN=Slc39a11 PE=1 SV=1	Slc39a11	35.466	0.943	0.871	1.06	1.244	1.044	0.978	1.027	1.007	0.985
Q9CXH7	Shugoshin 1 OS=Mus musculus OX=10090 GN=Sgo1 PE=2 SV=1	Sgo1	58.965
Q8VCZ6	Small G protein signaling modulator 3 OS=Mus musculus OX=10090 GN=Sgsm3 PE=1 SV=1	Sgsm3	85.489	1.076			1.458			1.5
Q8CGA0	Protein phosphatase 1F OS=Mus musculus OX=10090 GN=Ppm1f PE=1 SV=1	Ppm1f	49.61	1.006		1.197	0.75		0.714	0.963		1.184
Q3UU96	Serine/threonine-protein kinase MRCK alpha OS=Mus musculus OX=10090 GN=Cdc42bpa PE=1 SV=2	Cdc42bpa	195.53		1.021			1.021			1.141
P62843	40S ribosomal protein S15 OS=Mus musculus OX=10090 GN=Rps15 PE=1 SV=2	Rps15	17.04	1.02	1.065	1.079	1.025	1.049	1.076	0.964	0.929	0.918
Q922H2	[Pyruvate dehydrogenase (acetyl-transferring)] kinase isozyme 3, mitochondrial OS=Mus musculus OX=10090 GN=Pdk3 PE=1 SV=1	Pdk3	47.922	0.912	0.992	0.943	1.04	1.028	0.899	0.979	1.057	0.935
Q8BX13	E3 ubiquitin-protein ligase E3D OS=Mus musculus OX=10090 GN=Ube3d PE=2 SV=1	Ube3d	40.753
Q8C570	mRNA export factor OS=Mus musculus OX=10090 GN=Rae1 PE=1 SV=1	Rae1	40.965	1.033	1.164	1.062	0.986	0.98	0.925	1.024	0.972	0.912
O35316	Sodium- and chloride-dependent taurine transporter OS=Mus musculus OX=10090 GN=Slc6a6 PE=1 SV=2	Slc6a6	69.855	0.992	1.044	1.026	1.091	1.119	1.062	0.889	1.012	0.889
Q5SRY7	F-box/WD repeat-containing protein 11 OS=Mus musculus OX=10090 GN=Fbxw11 PE=1 SV=1	Fbxw11	62.062		1.071			1.049			1.192
Q5ND52	rRNA methyltransferase 3, mitochondrial OS=Mus musculus OX=10090 GN=Mrm3 PE=2 SV=1	Mrm3	46.795		0.941			1.052			1.009
Q32NY4	Metal transporter CNNM3 OS=Mus musculus OX=10090 GN=Cnnm3 PE=1 SV=2	Cnnm3	76.278
Q9CR41	Huntingtin-interacting protein K OS=Mus musculus OX=10090 GN=Hypk PE=1 SV=2	Hypk	14.679	1.028	0.978	1.116	0.887	0.989	0.901	1.037	1.034	0.958
Q922Q8	Leucine-rich repeat-containing protein 59 OS=Mus musculus OX=10090 GN=Lrrc59 PE=1 SV=1	Lrrc59	34.877	1.02	1.028	1.024	1.1	1.091	1.072	1.034	1.014	1.026
Q8CG50	Ras-related protein Rab-43 OS=Mus musculus OX=10090 GN=Rab43 PE=1 SV=1	Rab43	23.263	1.208			1.172			1.364
Q8CIV8	Tubulin-specific chaperone E OS=Mus musculus OX=10090 GN=Tbce PE=1 SV=1	Tbce	59.085		0.992			1.028			0.976
Q9DBF1	Alpha-aminoadipic semialdehyde dehydrogenase OS=Mus musculus OX=10090 GN=Aldh7a1 PE=1 SV=4	Aldh7a1	58.861	0.983	1.007	0.953	0.973	0.973	1.077	0.964	0.963	1.077
Q3UA16	Kinetochore protein Spc25 OS=Mus musculus OX=10090 GN=Spc25 PE=2 SV=1	Spc25	26.457
Q60710	Deoxynucleoside triphosphate triphosphohydrolase SAMHD1 OS=Mus musculus OX=10090 GN=Samhd1 PE=1 SV=3	Samhd1	75.892	0.919	0.929	0.949	0.928	0.866	0.805	0.898	0.871	0.836
Q62393	Tumor protein D52 OS=Mus musculus OX=10090 GN=Tpd52 PE=1 SV=2	Tpd52	24.313	0.999	1.007	1.024	0.746	0.825	0.797	0.752	0.841	0.788
Q8BGB2	Tetratricopeptide repeat protein 7A OS=Mus musculus OX=10090 GN=Ttc7a PE=1 SV=1	Ttc7a	96.155	1.062	1.095	1.025	1.147	1.06	1.078	0.89	1.055	1.005
Q9CYH5	Glucose-fructose oxidoreductase domain-containing protein 2 OS=Mus musculus OX=10090 GN=Gfod2 PE=2 SV=1	Gfod2	42.241
Q6P5E4	UDP-glucose:glycoprotein glucosyltransferase 1 OS=Mus musculus OX=10090 GN=Uggt1 PE=1 SV=4	Uggt1	176.43	0.967	0.965	0.987	1.049	1.021	1.016	1.045	1.022	1.058
Q3TAE8	Dolichyl pyrophosphate Man9GlcNAc2 alpha-1,3-glucosyltransferase OS=Mus musculus OX=10090 GN=Alg6 PE=2 SV=1	Alg6	57.873
Q99N28	Cell adhesion molecule 3 OS=Mus musculus OX=10090 GN=Cadm3 PE=1 SV=1	Cadm3	42.964	0.885			1.075			1.047
Q9CY21	Probable 18S rRNA (guanine-N(7))-methyltransferase OS=Mus musculus OX=10090 GN=Bud23 PE=1 SV=1	Bud23	31.586			1.09			1.011			0.976
P97393	Rho GTPase-activating protein 5 OS=Mus musculus OX=10090 GN=Arhgap5 PE=1 SV=2	Arhgap5	172.11	1.008	1.039	0.904	0.955	1.069	0.992	1.058	0.979	1.135
Q0VG18	Small integral membrane protein 24 OS=Mus musculus OX=10090 GN=Smim24 PE=1 SV=1	Smim24	13.546	0.83	0.859	0.841	0.707	0.695	0.798	0.743	0.813	0.945
Q8R1X6	Spartin OS=Mus musculus OX=10090 GN=Spart PE=1 SV=1	Spart	72.654			1.006			0.915			0.978
Q9JJL8	Serine--tRNA ligase, mitochondrial OS=Mus musculus OX=10090 GN=Sars2 PE=1 SV=2	Sars2	58.316	0.918	1.019	0.956	0.912	1.023	1	1.027	1.092	1.006
P47934	Carnitine O-acetyltransferase OS=Mus musculus OX=10090 GN=Crat PE=1 SV=3	Crat	70.839	0.762	0.822	0.853	0.785	0.877	0.799	0.974	0.93	0.955
Q9Z0V7	Mitochondrial import inner membrane translocase subunit Tim17-B OS=Mus musculus OX=10090 GN=Timm17b PE=1 SV=1	Timm17b	18.352	0.944	0.961	1.07	1.053	1.02	1.03	1.02	0.936	1.012
Q99KC8	von Willebrand factor A domain-containing protein 5A OS=Mus musculus OX=10090 GN=Vwa5a PE=1 SV=2	Vwa5a	87.142			0.968			0.903			0.999
P53657	Pyruvate kinase PKLR OS=Mus musculus OX=10090 GN=Pklr PE=1 SV=1	Pklr	62.308	0.732	0.769	0.768	0.609	0.698	0.659	0.645	0.723	0.704
Q61324	Aryl hydrocarbon receptor nuclear translocator 2 OS=Mus musculus OX=10090 GN=Arnt2 PE=1 SV=2	Arnt2	77.902	0.878			0.784			0.893
Q9Z0X4	cGMP-inhibited 3',5'-cyclic phosphodiesterase A OS=Mus musculus OX=10090 GN=Pde3a PE=1 SV=1	Pde3a	124.51
Q8BYW9	EGF domain-specific O-linked N-acetylglucosamine transferase OS=Mus musculus OX=10090 GN=Eogt PE=1 SV=1	Eogt	61.445	1.036	1.018		1.129	1.176		1.192	1.12
Q8R3F5	Malonyl-CoA-acyl carrier protein transacylase, mitochondrial OS=Mus musculus OX=10090 GN=Mcat PE=1 SV=3	Mcat	41.928	0.971	0.947	0.998	0.912	0.801	0.947	0.95	0.937	1.134
Q8VIK2	Mpv17-like protein 2 OS=Mus musculus OX=10090 GN=Mpv17l2 PE=1 SV=1	Mpv17l2	22.514	0.889			1.127			1.183
P22893	mRNA decay activator protein ZFP36 OS=Mus musculus OX=10090 GN=Zfp36 PE=1 SV=1	Zfp36	33.613			0.735			1			1.644
Q3USJ8	F-BAR and double SH3 domains protein 2 OS=Mus musculus OX=10090 GN=Fchsd2 PE=1 SV=2	Fchsd2	84.281			0.997			0.937			0.982
Q9JIG8	PRA1 family protein 2 OS=Mus musculus OX=10090 GN=Praf2 PE=1 SV=1	Praf2	19.478	0.995		0.967	1.043		1.034	1.134		1.072
Q8BK03	Mitoguardin 2 OS=Mus musculus OX=10090 GN=Miga2 PE=1 SV=1	Miga2	65.547
O88384	Vesicle transport through interaction with t-SNAREs homolog 1B OS=Mus musculus OX=10090 GN=Vti1b PE=1 SV=1	Vti1b	26.713	1.023	0.891	1.092	0.984	1.057	0.961	1.067	1.093	1.074
Q7TMB8	Cytoplasmic FMR1-interacting protein 1 OS=Mus musculus OX=10090 GN=Cyfip1 PE=1 SV=1	Cyfip1	145.24	1.019	1.004	0.986	1.109	1.065	1.053	0.952	0.988	1.06
Q9CZU3	Exosome RNA helicase MTR4 OS=Mus musculus OX=10090 GN=Mtrex PE=1 SV=1	Mtrex	117.64	1.051	1.015	1.086	1.018	1.031	1.031	1.029	1.024	0.991
Q922B1	O-acetyl-ADP-ribose deacetylase MACROD1 OS=Mus musculus OX=10090 GN=Macrod1 PE=1 SV=2	Macrod1	35.294	1.03	0.872		0.999	0.927		1.027	1.021
Q8BGF6	ELMO domain-containing protein 2 OS=Mus musculus OX=10090 GN=Elmod2 PE=1 SV=1	Elmod2	34.747
P52800	Ephrin-B2 OS=Mus musculus OX=10090 GN=Efnb2 PE=1 SV=1	Efnb2	37.202	0.967	0.733	0.71	1.136	1.114	1.206	1.616	2.218	2.301
Q0VBB0	PRELI domain-containing protein 2 OS=Mus musculus OX=10090 GN=Prelid2 PE=2 SV=1	Prelid2	20.42
Q9CQH3	NADH dehydrogenase [ubiquinone] 1 beta subcomplex subunit 5, mitochondrial OS=Mus musculus OX=10090 GN=Ndufb5 PE=1 SV=1	Ndufb5	21.71	0.877	0.911	0.94	1.081	1.063	1.099	0.926	0.993	0.965
Q8BMG8	Mitochondrial folate transporter/carrier OS=Mus musculus OX=10090 GN=Slc25a32 PE=1 SV=1	Slc25a32	35.048		0.937			1.01			1.094
Q62523	Zyxin OS=Mus musculus OX=10090 GN=Zyx PE=1 SV=2	Zyx	60.545	1.04	1.012	1.048	1.075	1.038	0.955	1.068	1.137	1.015
Q9CPT0	Apoptosis facilitator Bcl-2-like protein 14 OS=Mus musculus OX=10090 GN=Bcl2l14 PE=1 SV=1	Bcl2l14	36.991	0.933	0.97	0.988	0.93	0.962	0.945	0.826	0.911	0.921
Q60855	Receptor-interacting serine/threonine-protein kinase 1 OS=Mus musculus OX=10090 GN=Ripk1 PE=1 SV=1	Ripk1	74.854	0.985	0.971	0.921	1.027	1.052	0.994	1.056	1.026	1.064
Q3TEW6	Myelin protein zero-like protein 1 OS=Mus musculus OX=10090 GN=Mpzl1 PE=1 SV=1	Mpzl1	29.494	1.006		1.115	1.076		1.021	1.046		0.971
A2AGH6	Mediator of RNA polymerase II transcription subunit 12 OS=Mus musculus OX=10090 GN=Med12 PE=1 SV=1	Med12	244.56	1.041	0.95	1.026	1.076	1.106	1.028	1.16	1.002	1.093
Q8R480	Nuclear pore complex protein Nup85 OS=Mus musculus OX=10090 GN=Nup85 PE=1 SV=1	Nup85	74.775	0.971	0.99	0.997	1.093	1.151	1.107	1.057	1.053	1.05
Q8CB77	Elongin-A OS=Mus musculus OX=10090 GN=Eloa PE=1 SV=3	Eloa	87.16	1.066		1.072	0.874		0.863	1.182		1.102
P21271	Unconventional myosin-Vb OS=Mus musculus OX=10090 GN=Myo5b PE=1 SV=2	Myo5b	210.57	0.961	0.945	0.956	1.095	1.111	1.086	1.23	1.018	1.064
O35344	Importin subunit alpha-4 OS=Mus musculus OX=10090 GN=Kpna3 PE=1 SV=1	Kpna3	57.772	1.046	0.936	1.017	1.048	0.933	1.025	1.047	0.878	1.011
P27784	C-C motif chemokine 6 OS=Mus musculus OX=10090 GN=Ccl6 PE=1 SV=1	Ccl6	12.984	0.962	0.794	0.933	0.894	0.809	0.811	1.069	0.99	0.876
E9Q5F9	Histone-lysine N-methyltransferase SETD2 OS=Mus musculus OX=10090 GN=Setd2 PE=1 SV=1	Setd2	285.66	1.08		0.927	0.958		1.32	0.988		1.105
Q8CGB3	Uveal autoantigen with coiled-coil domains and ankyrin repeats OS=Mus musculus OX=10090 GN=Uaca PE=1 SV=2	Uaca	160.81	0.986	0.98	0.957	1.037	1.044	1.075	1.1	1.098	1.065
Q9D0C4	tRNA (guanine(37)-N1)-methyltransferase OS=Mus musculus OX=10090 GN=Trmt5 PE=1 SV=1	Trmt5	56.794	0.995	1.033	1.035	0.917	0.84	1.048	0.947	0.962	0.974
A2AI08	Taperin OS=Mus musculus OX=10090 GN=Tprn PE=1 SV=1	Tprn	80.088
Q9D0R2	Threonine--tRNA ligase, cytoplasmic OS=Mus musculus OX=10090 GN=Tars PE=1 SV=2	Tars	83.355	1.048	1.055	1.043	0.869	0.867	0.857	0.899	0.884	0.916
Q9QUH0	Glutaredoxin-1 OS=Mus musculus OX=10090 GN=Glrx PE=1 SV=3	Glrx	11.871	0.79	0.829	0.784	0.603	0.683	0.657	0.687	0.764	0.8
Q8VDG5	Phosphopantothenate--cysteine ligase OS=Mus musculus OX=10090 GN=Ppcs PE=1 SV=1	Ppcs	33.794	0.914	0.908	0.866	1.371	0.984	1.165	1.018	0.97	1.021
Q8R5K4	Nucleolar protein 6 OS=Mus musculus OX=10090 GN=Nol6 PE=2 SV=2	Nol6	129.23	1.077	1.07	1.235	1.104	1.034	1.212	1.146	1.146	1.322
Q8C9B9	Death-inducer obliterator 1 OS=Mus musculus OX=10090 GN=Dido1 PE=1 SV=4	Dido1	247.17		0.992	0.978		0.883	0.824		0.951	1.118
Q9D1P2	Histone acetyltransferase KAT8 OS=Mus musculus OX=10090 GN=Kat8 PE=1 SV=1	Kat8	52.573	0.861	1.005	0.959	0.954	1.042	0.96	0.898	0.956	0.886
Q9D2Q2	Probable tRNA (uracil-O(2)-)-methyltransferase OS=Mus musculus OX=10090 GN=Trmt44 PE=2 SV=2	Trmt44	79.835		0.781	0.865		1.043	1.026		1.172	1.13
Q6PCL9	Poly(A) polymerase gamma OS=Mus musculus OX=10090 GN=Papolg PE=1 SV=1	Papolg	82.956			1.065			1.22			1.069
Q9QYL7	Activator of basal transcription 1 OS=Mus musculus OX=10090 GN=Abt1 PE=2 SV=1	Abt1	30.658			1.156			0.95			1.179
Q9CXY9	GPI-anchor transamidase OS=Mus musculus OX=10090 GN=Pigk PE=1 SV=2	Pigk	44.895		1.125			1.023			1.021
Q9CR50	RING finger and CHY zinc finger domain-containing protein 1 OS=Mus musculus OX=10090 GN=Rchy1 PE=1 SV=1	Rchy1	30.014	0.848	0.89	0.86	0.937	0.836	0.97	0.881	0.801	0.773
Q8CGZ0	Calcium homeostasis endoplasmic reticulum protein OS=Mus musculus OX=10090 GN=Cherp PE=1 SV=1	Cherp	106.17	0.999	1.066	1.007	0.978	1.044	1.025	0.985	0.973	1.005
Q9CWT6	Probable ATP-dependent RNA helicase DDX28 OS=Mus musculus OX=10090 GN=Ddx28 PE=2 SV=2	Ddx28	59.514	1.019	1.099	1.015	1.011	1.02	1.035	1.018	1.127	1.151
Q923J1	Transient receptor potential cation channel subfamily M member 7 OS=Mus musculus OX=10090 GN=Trpm7 PE=1 SV=1	Trpm7	212.4
P16406	Glutamyl aminopeptidase OS=Mus musculus OX=10090 GN=Enpep PE=1 SV=1	Enpep	107.96	0.855	0.877	0.873	0.892	0.869	0.887	0.819	0.878	0.864
Q9R097	Kunitz-type protease inhibitor 1 OS=Mus musculus OX=10090 GN=Spint1 PE=1 SV=2	Spint1	56.59		1.235			1.137			1.017
Q9DCL9	Multifunctional protein ADE2 OS=Mus musculus OX=10090 GN=Paics PE=1 SV=4	Paics	47.006	1.071	1.061	1.037	1.051	1.022	1.071	1.02	1.023	1.029
P47758	Signal recognition particle receptor subunit beta OS=Mus musculus OX=10090 GN=Srprb PE=1 SV=1	Srprb	29.579	1.01	1.035	0.998	1.057	1.055	1.12	1.104	0.987	1.127
Q64FW2	All-trans-retinol 13,14-reductase OS=Mus musculus OX=10090 GN=Retsat PE=1 SV=3	Retsat	67.334	0.771	0.742	0.751	0.927	0.887	0.913	0.923	0.876	0.905
Q76N33	AMSH-like protease OS=Mus musculus OX=10090 GN=Stambpl1 PE=1 SV=1	Stambpl1	49.639			1.111			1.05			0.951
Q9CPV4	Glyoxalase domain-containing protein 4 OS=Mus musculus OX=10090 GN=Glod4 PE=1 SV=1	Glod4	33.316	0.998	0.991	0.985	0.846	0.804	0.816	0.898	0.857	0.854
P35456	Urokinase plasminogen activator surface receptor OS=Mus musculus OX=10090 GN=Plaur PE=1 SV=1	Plaur	35.428			0.93			2.376			2.115
Q8C522	Endonuclease domain-containing 1 protein OS=Mus musculus OX=10090 GN=Endod1 PE=1 SV=2	Endod1	55.262			1.112			1.15			1.064
Q923U0	TOM1-like protein 1 OS=Mus musculus OX=10090 GN=Tom1l1 PE=1 SV=1	Tom1l1	52.694	1.042	1.03	1.052	1.031	0.973	0.946	1.033	1.106	1.139
Q9CQV7	Mitochondrial import inner membrane translocase subunit TIM14 OS=Mus musculus OX=10090 GN=Dnajc19 PE=1 SV=3	Dnajc19	12.436	0.956	1.001	0.936	1.032	1.054	1.065	0.984	1.051	1.125
Q3TQB2	FAD-dependent oxidoreductase domain-containing protein 1 OS=Mus musculus OX=10090 GN=Foxred1 PE=1 SV=1	Foxred1	54.177	1.02	1.019	0.885	0.991	1.086	1.107	0.84	0.744	1.098
P28660	Nck-associated protein 1 OS=Mus musculus OX=10090 GN=Nckap1 PE=1 SV=2	Nckap1	128.78	1.006	0.985	0.96	1.036	1.016	0.986	0.97	0.977	1.042
Q6Q473	Calcium-activated chloride channel regulator 4A OS=Mus musculus OX=10090 GN=Clca4a PE=1 SV=2	Clca4a	101.87	0.918	0.933	0.917	1.016	0.943	0.955	1.011	0.853	0.869
Q8BJ83	TM2 domain-containing protein 3 OS=Mus musculus OX=10090 GN=Tm2d3 PE=2 SV=1	Tm2d3	28.88		0.977			1.363			1.298
Q91X84	CREB-regulated transcription coactivator 3 OS=Mus musculus OX=10090 GN=Crtc3 PE=1 SV=2	Crtc3	67.026
P43137	Lithostathine-1 OS=Mus musculus OX=10090 GN=Reg1 PE=1 SV=1	Reg1	18.518	0.787	0.721	0.772	0.405	0.432	0.427	0.533	0.488	0.524
P28738	Kinesin heavy chain isoform 5C OS=Mus musculus OX=10090 GN=Kif5c PE=1 SV=3	Kif5c	109.27		0.468			0.575			1.855
Q61037	Tuberin OS=Mus musculus OX=10090 GN=Tsc2 PE=1 SV=1	Tsc2	202.07
Q6PDQ2	Chromodomain-helicase-DNA-binding protein 4 OS=Mus musculus OX=10090 GN=Chd4 PE=1 SV=1	Chd4	217.75	1.007	1.008	1.034	0.997	1.014	0.975	1.025	0.973	1.034
Q9D2U5	N-alpha-acetyltransferase 38, NatC auxiliary subunit OS=Mus musculus OX=10090 GN=Naa38 PE=1 SV=1	Naa38	13.43		1.082	1.034		1.06	0.994		1.044	1.175
Q8BH51	Cytochrome c oxidase assembly protein COX14 OS=Mus musculus OX=10090 GN=Cox14 PE=3 SV=1	Cox14	6.3804	0.929		1.002	1.11		1.1	0.926		0.992
P56395	Cytochrome b5 OS=Mus musculus OX=10090 GN=Cyb5a PE=1 SV=2	Cyb5a	15.241	0.991	0.908	0.926	1.037	1.045	1.004	1.081	0.982	1.036
P70193	Leucine-rich repeats and immunoglobulin-like domains protein 1 OS=Mus musculus OX=10090 GN=Lrig1 PE=1 SV=2	Lrig1	119.15
Q9WUP7	Ubiquitin carboxyl-terminal hydrolase isozyme L5 OS=Mus musculus OX=10090 GN=Uchl5 PE=1 SV=2	Uchl5	37.616	1.077	1.058	1.059	1.02	0.945	1.019	1.068	1.031	0.984
Q6P3B9	Putative ribosome-binding factor A, mitochondrial OS=Mus musculus OX=10090 GN=Rbfa PE=2 SV=1	Rbfa	39.317	1.033		0.972	1.125		1.078	1.013		1.265
Q8VIG1	RE1-silencing transcription factor OS=Mus musculus OX=10090 GN=Rest PE=1 SV=2	Rest	117.78
Q9D967	Magnesium-dependent phosphatase 1 OS=Mus musculus OX=10090 GN=Mdp1 PE=1 SV=1	Mdp1	18.582	1.026	1.114	1.034	0.669	1.074	0.84	0.878	1.018	0.936
Q9JMF7	Dolichyldiphosphatase 1 OS=Mus musculus OX=10090 GN=Dolpp1 PE=2 SV=1	Dolpp1	27.098	0.889	0.874	0.906	1.164	0.831	1.134	1.135	1.085	1.129
Q7SIG6	Arf-GAP with SH3 domain, ANK repeat and PH domain-containing protein 2 OS=Mus musculus OX=10090 GN=Asap2 PE=1 SV=3	Asap2	106.8			1.038			1.026			1.037
Q7TPM1	Protein PRRC2B OS=Mus musculus OX=10090 GN=Prrc2b PE=1 SV=1	Prrc2b	160.91	1.068			0.589			1.19
Q8R395	COMM domain-containing protein 5 OS=Mus musculus OX=10090 GN=Commd5 PE=1 SV=1	Commd5	24.493
Q9D0N8	Transmembrane protein 88 OS=Mus musculus OX=10090 GN=Tmem88 PE=1 SV=1	Tmem88	17.358			0.968			0.718			0.884
Q61585	G0/G1 switch protein 2 OS=Mus musculus OX=10090 GN=G0s2 PE=1 SV=1	G0s2	11.118
Q9D826	Peroxisomal sarcosine oxidase OS=Mus musculus OX=10090 GN=Pipox PE=1 SV=1	Pipox	43.846	0.807	0.894	0.878	0.96	0.809	0.838	1.162	0.943	0.984
Q811C2	Cysteine protease ATG4C OS=Mus musculus OX=10090 GN=Atg4c PE=1 SV=2	Atg4c	52.055
P46638	Ras-related protein Rab-11B OS=Mus musculus OX=10090 GN=Rab11b PE=1 SV=3	Rab11b	24.489		0.961	0.895		0.99	1.032		0.988	0.985
P69566	Ran-binding protein 9 OS=Mus musculus OX=10090 GN=Ranbp9 PE=1 SV=1	Ranbp9	71.011	1.065	0.979	1.08	1.292	0.972	1.148	0.909	1.047	1.098
Q8R1M2	Histone H2A.J OS=Mus musculus OX=10090 GN=H2afj PE=1 SV=1	H2afj	14.045
P60041	Somatostatin OS=Mus musculus OX=10090 GN=Sst PE=3 SV=1	Sst	12.745	0.999	1.046	0.944	0.968	0.896	0.896	0.96	0.96	0.89
Q6EJB6	U3 small nucleolar RNA-associated protein 14 homolog B OS=Mus musculus OX=10090 GN=Utp14b PE=1 SV=2	Utp14b	85.927
Q99P31	Hsp70-binding protein 1 OS=Mus musculus OX=10090 GN=Hspbp1 PE=1 SV=1	Hspbp1	39.166	1.061	1.053	1.143	0.991	0.967	0.913	1.092	1.105	1.208
P80313	T-complex protein 1 subunit eta OS=Mus musculus OX=10090 GN=Cct7 PE=1 SV=1	Cct7	59.652	1.022	1.032	1.045	1.015	1.03	1.019	0.954	0.937	0.953
O88491	Histone-lysine N-methyltransferase, H3 lysine-36 and H4 lysine-20 specific OS=Mus musculus OX=10090 GN=Nsd1 PE=1 SV=1	Nsd1	284.08		1.08			0.901			1.024
Q61699	Heat shock protein 105 kDa OS=Mus musculus OX=10090 GN=Hsph1 PE=1 SV=2	Hsph1	96.406	1.114	1.083	1.101	0.989	1.02	1.033	1.052	1.048	1.047
P51410	60S ribosomal protein L9 OS=Mus musculus OX=10090 GN=Rpl9 PE=2 SV=2	Rpl9	21.881	1.034	1.03	1.009	1.119	1.123	1.033	1.01	0.971	0.98
Q9JIX0	Transcription and mRNA export factor ENY2 OS=Mus musculus OX=10090 GN=Eny2 PE=1 SV=1	Eny2	11.528	1.057	1.059	1.021	0.915	0.863	0.903	1.051	0.849	0.864
Q78JW9	Ubiquitin domain-containing protein UBFD1 OS=Mus musculus OX=10090 GN=Ubfd1 PE=1 SV=2	Ubfd1	40.143	0.969	0.932	0.983	0.899	1.256	0.917	0.934	0.878	0.957
Q8CFE2	Histone PARylation factor 1 OS=Mus musculus OX=10090 GN=Hpf1 PE=1 SV=1	Hpf1	39.291	1.084	1.032	1.017	1.054	1.2	0.989	0.988	0.982	0.996
Q91Y74	CMP-N-acetylneuraminate-beta-galactosamide-alpha-2,3-sialyltransferase 4 OS=Mus musculus OX=10090 GN=St3gal4 PE=1 SV=1	St3gal4	38.058	0.848	0.883	0.98	1.446	1.218	1.209	1.055	1.121	1.072
Q8BVL9	Janus kinase and microtubule-interacting protein 1 OS=Mus musculus OX=10090 GN=Jakmip1 PE=1 SV=2	Jakmip1	73.138		1.001			0.821			1.007
P47809	Dual specificity mitogen-activated protein kinase kinase 4 OS=Mus musculus OX=10090 GN=Map2k4 PE=1 SV=2	Map2k4	44.113	1.064	0.791		0.838	0.839		0.97	1.131
P61021	Ras-related protein Rab-5B OS=Mus musculus OX=10090 GN=Rab5b PE=1 SV=1	Rab5b	23.707	1.026	0.763	1.027	0.926	1.135	1.021	0.879	1.273	1.089
Q9JHW4	Selenocysteine-specific elongation factor OS=Mus musculus OX=10090 GN=Eefsec PE=1 SV=2	Eefsec	63.538	0.97	0.961	0.955	1.009	1.052	1.059	1.003	0.944	1.016
P22366	Myeloid differentiation primary response protein MyD88 OS=Mus musculus OX=10090 GN=Myd88 PE=1 SV=3	Myd88	33.753	0.938	0.924	0.948	1.004	1.014	1.038	0.841	0.929	1.174
Q9CR63	Cytochrome c oxidase assembly protein COX16 homolog, mitochondrial OS=Mus musculus OX=10090 GN=Cox16 PE=3 SV=1	Cox16	12.266	1.093			1.107			1.077
P42932	T-complex protein 1 subunit theta OS=Mus musculus OX=10090 GN=Cct8 PE=1 SV=3	Cct8	59.555	1.052	1.037	1.039	0.991	1.002	1.02	0.98	0.967	0.961
Q8BFW7	Lipoma-preferred partner homolog OS=Mus musculus OX=10090 GN=Lpp PE=1 SV=1	Lpp	65.89	0.97	0.975	1.047	0.957	1.061	0.971	0.928	0.856	0.992
Q91YJ3	Thymocyte nuclear protein 1 OS=Mus musculus OX=10090 GN=Thyn1 PE=1 SV=1	Thyn1	26.178	0.962	0.871	1.004	0.81	0.747	0.862	1.14	1.08	0.907
O70422	General transcription factor IIH subunit 4 OS=Mus musculus OX=10090 GN=Gtf2h4 PE=1 SV=1	Gtf2h4	52.224	1.125		1.051	1.166		1.36	1.421		1.541
O88312	Anterior gradient protein 2 homolog OS=Mus musculus OX=10090 GN=Agr2 PE=1 SV=1	Agr2	19.92	0.996	1.005	1.067	0.971	0.973	0.971	0.83	0.948	0.956
Q9WV96	Mitochondrial import inner membrane translocase subunit Tim10 B OS=Mus musculus OX=10090 GN=Timm10b PE=1 SV=1	Timm10b	11.314			1.059			1.096			1.069
Q69ZJ7	RAB6A-GEF complex partner protein 1 OS=Mus musculus OX=10090 GN=Ric1 PE=1 SV=2	Ric1	158.83
P62852	40S ribosomal protein S25 OS=Mus musculus OX=10090 GN=Rps25 PE=1 SV=1	Rps25	13.742	1.062	1.089	1.075	0.941	1.029	0.982	0.949	1.005	0.999
Q99LX5	Multiple myeloma tumor-associated protein 2 homolog OS=Mus musculus OX=10090 GN=Mmtag2 PE=2 SV=1	Mmtag2	29.298	1.052	1.018	1.001	0.857	0.938	0.979	1	0.89	1.097
Q80WQ8	Mis18-binding protein 1 OS=Mus musculus OX=10090 GN=Mis18bp1 PE=1 SV=1	Mis18bp1	113.95
Q9QZI9	Serine incorporator 3 OS=Mus musculus OX=10090 GN=Serinc3 PE=1 SV=2	Serinc3	52.622	0.983	0.739	0.754	1.06	0.887	0.844	1.002	1.305	1.53
Q9D787	RING-type E3 ubiquitin-protein ligase PPIL2 OS=Mus musculus OX=10090 GN=Ppil2 PE=1 SV=2	Ppil2	59.064	1.029	1.003	1.02	0.937	1.013	1.156	1.003	0.976	1.2
Q9JM76	Actin-related protein 2/3 complex subunit 3 OS=Mus musculus OX=10090 GN=Arpc3 PE=1 SV=3	Arpc3	20.524	1.003	0.778	0.989	0.994	0.9	0.941	0.797	1.191	0.81
Q61908	Cx9C motif-containing protein 4 OS=Mus musculus OX=10090 GN=Cmc4 PE=2 SV=1	Cmc4	7.743
Q9CQ10	Charged multivesicular body protein 3 OS=Mus musculus OX=10090 GN=Chmp3 PE=1 SV=3	Chmp3	25.219	1.072	1.046		0.968	1.001		0.887	0.851
Q9JKY0	CCR4-NOT transcription complex subunit 9 OS=Mus musculus OX=10090 GN=Cnot9 PE=1 SV=1	Cnot9	33.601	1.056	0.966	1.028	1.055	1.005	1.001	1.014	0.939	1.043
Q9D6Y7	Mitochondrial peptide methionine sulfoxide reductase OS=Mus musculus OX=10090 GN=Msra PE=1 SV=1	Msra	25.988	0.855	0.873	0.814	0.901	0.875	0.836	0.973	0.915	0.982
P47740	Fatty aldehyde dehydrogenase OS=Mus musculus OX=10090 GN=Aldh3a2 PE=1 SV=2	Aldh3a2	53.97	0.82	0.815	0.818	0.946	0.981	0.967	0.909	0.955	0.944
Q91WL8	WW domain-containing oxidoreductase OS=Mus musculus OX=10090 GN=Wwox PE=1 SV=1	Wwox	46.512		0.943			1.072			0.944
Q9DCV3	Diacylglycerol O-acyltransferase 2 OS=Mus musculus OX=10090 GN=Dgat2 PE=1 SV=1	Dgat2	43.769	0.857			1.415			1.036
P51569	Alpha-galactosidase A OS=Mus musculus OX=10090 GN=Gla PE=1 SV=1	Gla	47.642	0.945	0.923	1.136	1.012	0.97	1.182	1.178	1.084	1.186
P01027	Complement C3 OS=Mus musculus OX=10090 GN=C3 PE=1 SV=3	C3	186.48	1.245	1.203	1.265	1.535	1.621	1.455	1.648	1.853	1.992
O35143	ATPase inhibitor, mitochondrial OS=Mus musculus OX=10090 GN=ATP5IF1 PE=1 SV=2	ATP5IF1	12.159	0.924	0.921	0.904	0.775	0.723	0.712	0.732	0.636	0.758
Q9WUM5	Succinate--CoA ligase [ADP/GDP-forming] subunit alpha, mitochondrial OS=Mus musculus OX=10090 GN=Suclg1 PE=1 SV=4	Suclg1	36.154	0.852	0.877	0.879	1.011	0.972	1.033	0.983	1.066	0.976
Q9CZR3	Mitochondrial import receptor subunit TOM40B OS=Mus musculus OX=10090 GN=Tomm40l PE=1 SV=1	Tomm40l	34.004	0.965		0.975	1.097		1.102	1.088		1.069
Q8K3Z0	Nucleotide-binding oligomerization domain-containing protein 2 OS=Mus musculus OX=10090 GN=Nod2 PE=1 SV=1	Nod2	113.56	1.043		1.009	0.722		0.697	0.713		0.681
Q03963	Interferon-induced, double-stranded RNA-activated protein kinase OS=Mus musculus OX=10090 GN=Eif2ak2 PE=1 SV=2	Eif2ak2	58.279	1.047	0.944	0.98	1.023	1.094	1.045	1.04	0.856	1.026
Q9DC29	ATP-binding cassette sub-family B member 6, mitochondrial OS=Mus musculus OX=10090 GN=Abcb6 PE=1 SV=1	Abcb6	93.769	0.988			1.262			1.2
Q9JL35	High mobility group nucleosome-binding domain-containing protein 5 OS=Mus musculus OX=10090 GN=Hmgn5 PE=1 SV=2	Hmgn5	45.343	0.944	0.954	0.88	0.795	0.768	0.808	1.017	1.01	1.104
Q8K353	Cysteine-rich and transmembrane domain-containing protein 1 OS=Mus musculus OX=10090 GN=Cystm1 PE=1 SV=1	Cystm1	11.402	1.059		1.098	1.082		1.253	0.938		1.008
Q6P542	ATP-binding cassette sub-family F member 1 OS=Mus musculus OX=10090 GN=Abcf1 PE=1 SV=1	Abcf1	94.944	1.059	1.022	1.058	0.979	0.998	1.046	0.966	0.977	1.011
Q3L180	Alpha-defensin 26 OS=Mus musculus OX=10090 GN=Defa26 PE=3 SV=1	Defa26	10.514	0.886	1.194	1.055	0.671	1.031	0.784	0.697	1.465	1.176
P97789	5'-3' exoribonuclease 1 OS=Mus musculus OX=10090 GN=Xrn1 PE=1 SV=1	Xrn1	194.31	0.623	0.955	0.831	0.978	1.048	1.068	1.637	1.122	1.488
P09671	Superoxide dismutase [Mn], mitochondrial OS=Mus musculus OX=10090 GN=Sod2 PE=1 SV=3	Sod2	24.603	0.97	0.972	0.983	0.819	0.886	0.815	0.944	0.913	0.897
P62814	V-type proton ATPase subunit B, brain isoform OS=Mus musculus OX=10090 GN=Atp6v1b2 PE=1 SV=1	Atp6v1b2	56.55	0.99	0.975	1.002	1.016	1.023	1.019	0.971	0.985	0.992
P58059	28S ribosomal protein S21, mitochondrial OS=Mus musculus OX=10090 GN=Mrps21 PE=1 SV=1	Mrps21	10.561	0.959	0.954	0.963	1.117	1.147	1.03	1.041	0.977	1.1
Q569Z5	Probable ATP-dependent RNA helicase DDX46 OS=Mus musculus OX=10090 GN=Ddx46 PE=1 SV=2	Ddx46	117.45	1.028	1.017	1.038	0.904	0.953	1.026	0.941	1.049	1
Q99NA9	Polycomb group RING finger protein 6 OS=Mus musculus OX=10090 GN=Pcgf6 PE=1 SV=1	Pcgf6	39.82
Q64442	Sorbitol dehydrogenase OS=Mus musculus OX=10090 GN=Sord PE=1 SV=3	Sord	38.249	0.861	0.859	0.824	0.752	0.717	0.612	0.784	0.724	0.612
Q8K1R7	Serine/threonine-protein kinase Nek9 OS=Mus musculus OX=10090 GN=Nek9 PE=1 SV=2	Nek9	107.14	1.015	0.962	0.994	0.99	1.025	0.985	1.141	1.142	1.052
Q61171	Peroxiredoxin-2 OS=Mus musculus OX=10090 GN=Prdx2 PE=1 SV=3	Prdx2	21.778	0.944	0.946	0.967	0.801	0.779	0.807	0.838	0.877	0.824
Q9QXE0	2-hydroxyacyl-CoA lyase 1 OS=Mus musculus OX=10090 GN=Hacl1 PE=1 SV=2	Hacl1	63.66		0.889	0.86		0.918	1.056		0.98	1.142
Q8BU30	Isoleucine--tRNA ligase, cytoplasmic OS=Mus musculus OX=10090 GN=Iars PE=1 SV=2	Iars	144.27	1.002	0.997	0.992	1.021	1.038	1.071	0.964	1.015	1
Q61316	Heat shock 70 kDa protein 4 OS=Mus musculus OX=10090 GN=Hspa4 PE=1 SV=1	Hspa4	94.132	1.039	1.055	1.049	0.865	0.907	0.88	0.93	0.927	0.922
Q9Z2G0	Protein fem-1 homolog B OS=Mus musculus OX=10090 GN=Fem1b PE=1 SV=1	Fem1b	70.222	0.806	0.807		1.191	1.212		1.409	1.457
Q9DBG3	AP-2 complex subunit beta OS=Mus musculus OX=10090 GN=Ap2b1 PE=1 SV=1	Ap2b1	104.58	1.054	1.091	1.02	0.907	0.993	0.935	0.845	0.994	1.03
Q9D6N1	Carbonic anhydrase 13 OS=Mus musculus OX=10090 GN=Ca13 PE=1 SV=1	Ca13	29.522	1.007	0.947	0.991	0.826	0.851	0.804	0.787	0.857	0.861
Q9CQE2	Transmembrane protein 223 OS=Mus musculus OX=10090 GN=Tmem223 PE=2 SV=1	Tmem223	21.856		0.958	0.846		0.892	1.076		1.051	1.099
Q8BHX1	HAUS augmin-like complex subunit 1 OS=Mus musculus OX=10090 GN=Haus1 PE=1 SV=2	Haus1	31.379
P16110	Galectin-3 OS=Mus musculus OX=10090 GN=Lgals3 PE=1 SV=3	Lgals3	27.515	1.282	1.318	1.298	1.517	1.551	1.547	1.228	1.297	1.206
Q8BIA4	F-box/WD repeat-containing protein 8 OS=Mus musculus OX=10090 GN=Fbxw8 PE=1 SV=2	Fbxw8	67.955
Q9WVD4	H(+)/Cl(-) exchange transporter 5 OS=Mus musculus OX=10090 GN=Clcn5 PE=1 SV=1	Clcn5	83.1
Q91VN6	Probable ATP-dependent RNA helicase DDX41 OS=Mus musculus OX=10090 GN=Ddx41 PE=1 SV=2	Ddx41	69.819		1.016	1.02		0.964	1.142		1.047	1.14
Q9JHU4	Cytoplasmic dynein 1 heavy chain 1 OS=Mus musculus OX=10090 GN=Dync1h1 PE=1 SV=2	Dync1h1	532.04	0.984	0.985	0.989	1.046	1.02	1.048	0.978	0.982	1.017
Q921H8	3-ketoacyl-CoA thiolase A, peroxisomal OS=Mus musculus OX=10090 GN=Acaa1a PE=1 SV=1	Acaa1a	43.953	0.867	0.891	0.875	0.836	0.747	0.853	0.832	0.889	0.925
P10711	Transcription elongation factor A protein 1 OS=Mus musculus OX=10090 GN=Tcea1 PE=1 SV=2	Tcea1	33.88	1	1.067	1.07	0.881	0.893	0.859	0.936	0.96	0.929
Q8BVQ5	Protein phosphatase methylesterase 1 OS=Mus musculus OX=10090 GN=Ppme1 PE=1 SV=5	Ppme1	42.256	1.049	1.025	1.084	0.89	1.031	0.984	1.023	0.908	1.081
Q64446	Copper-transporting ATPase 2 OS=Mus musculus OX=10090 GN=Atp7b PE=1 SV=2	Atp7b	157.19		0.975	1.174		1.14	0.819		1.226	1.418
P58501	PAX3- and PAX7-binding protein 1 OS=Mus musculus OX=10090 GN=Paxbp1 PE=1 SV=3	Paxbp1	104.83	1.003	1.072	1.133	1.064	1.023	1.027	0.985	1.134	1.175
Q5SUE8	Ankyrin repeat domain-containing protein 40 OS=Mus musculus OX=10090 GN=Ankrd40 PE=1 SV=1	Ankrd40	40.56
Q8VDP2	UPF0428 protein CXorf56 homolog OS=Mus musculus OX=10090 PE=1 SV=1	---	25.594	1.228	1.046	1.044	0.833	1.021	0.987	1.159	1.104	1.01
Q8K3W3	Protein CASC3 OS=Mus musculus OX=10090 GN=Casc3 PE=1 SV=3	Casc3	75.769	1.006	1.027	1.078	0.952	0.866	0.939	1.033	0.973	1.068
Q80XU3	Nuclear ubiquitous casein and cyclin-dependent kinase substrate 1 OS=Mus musculus OX=10090 GN=Nucks1 PE=1 SV=1	Nucks1	26.313	0.946	0.929	0.967	0.857	0.744	0.782	0.773	0.728	0.773
P97765	WW domain-binding protein 2 OS=Mus musculus OX=10090 GN=Wbp2 PE=1 SV=1	Wbp2	28.032	1.004		1.032	0.976		0.91	1.039		0.866
Q9DCL2	MIP18 family protein FAM96A OS=Mus musculus OX=10090 GN=Fam96a PE=1 SV=1	Fam96a	18.418
Q9WTK3	Glycosylphosphatidylinositol anchor attachment 1 protein OS=Mus musculus OX=10090 GN=Gpaa1 PE=1 SV=3	Gpaa1	67.948	0.882	0.958	0.959	1.035	1.013	1.079	1.105	1.075	1.146
Q3U1J4	DNA damage-binding protein 1 OS=Mus musculus OX=10090 GN=Ddb1 PE=1 SV=2	Ddb1	126.85	0.995	0.988	0.954	0.937	0.947	0.943	0.992	1	0.916
Q6P1F6	Serine/threonine-protein phosphatase 2A 55 kDa regulatory subunit B alpha isoform OS=Mus musculus OX=10090 GN=Ppp2r2a PE=1 SV=1	Ppp2r2a	51.691	1.017	0.987	1.029	1.06	1.059	1.017	0.852	0.886	0.963
Q02819	Nucleobindin-1 OS=Mus musculus OX=10090 GN=Nucb1 PE=1 SV=2	Nucb1	53.408	1.027	1.014	0.985	1.017	1.013	1.011	1.061	1.018	0.981
Q80Y44	Probable ATP-dependent RNA helicase DDX10 OS=Mus musculus OX=10090 GN=Ddx10 PE=1 SV=2	Ddx10	100.74		1.008	1.102		1.056	1.183		1.113	1.23
Q64459	Cytochrome P450 3A11 OS=Mus musculus OX=10090 GN=Cyp3a11 PE=1 SV=1	Cyp3a11	57.854	0.881	0.598	0.652	1.237	0.944	1.076	1.433	0.841	1.268
Q8C3W1	Uncharacterized protein C1orf198 homolog OS=Mus musculus OX=10090 PE=1 SV=1	---	35.316		1.053			1.154			1.309
Q8BX57	PX domain-containing protein kinase-like protein OS=Mus musculus OX=10090 GN=Pxk PE=1 SV=2	Pxk	65.23		1.083	0.919		1.134	0.923		1.219	0.923
P97372	Proteasome activator complex subunit 2 OS=Mus musculus OX=10090 GN=Psme2 PE=1 SV=4	Psme2	27.057	0.95	0.942	1.005	0.804	0.798	0.826	0.798	0.865	0.822
P61961	Ubiquitin-fold modifier 1 OS=Mus musculus OX=10090 GN=Ufm1 PE=1 SV=1	Ufm1	9.1175	1.058	1.056	1.045	0.814	0.819	0.801	0.745	0.807	0.767
Q9Z108	Double-stranded RNA-binding protein Staufen homolog 1 OS=Mus musculus OX=10090 GN=Stau1 PE=1 SV=1	Stau1	53.924	1.055	1.025		1.023	1.092		1.063	1.206
P35546	Proto-oncogene tyrosine-protein kinase receptor Ret OS=Mus musculus OX=10090 GN=Ret PE=1 SV=2	Ret	123.87
P10833	Ras-related protein R-Ras OS=Mus musculus OX=10090 GN=Rras PE=1 SV=1	Rras	23.764	1.018	1.021	0.961	1.118	1.255	1.113	1.086	1.093	1.068
Q8K4L0	ATP-dependent RNA helicase DDX54 OS=Mus musculus OX=10090 GN=Ddx54 PE=1 SV=1	Ddx54	97.747	1.074	1.06	1.087	1.161	1.045	1.129	1.195	1.126	1.144
Q8VHI3	GDP-fucose protein O-fucosyltransferase 2 OS=Mus musculus OX=10090 GN=Pofut2 PE=1 SV=1	Pofut2	49.429
Q923D5	WW domain-binding protein 11 OS=Mus musculus OX=10090 GN=Wbp11 PE=1 SV=2	Wbp11	69.874	1.069	1.034	1.083	0.878	0.93	0.876	0.972	0.943	0.994
Q6PDK2	Histone-lysine N-methyltransferase 2D OS=Mus musculus OX=10090 GN=Kmt2d PE=1 SV=2	Kmt2d	600.24		1.093	0.95		0.959	0.693		0.983	1.175
Q8JZM7	Parafibromin OS=Mus musculus OX=10090 GN=Cdc73 PE=1 SV=1	Cdc73	60.576	1.116	1.118	1.027	1.007	1	1.005	1.192	1.171	1.058
Q8BMF4	Dihydrolipoyllysine-residue acetyltransferase component of pyruvate dehydrogenase complex, mitochondrial OS=Mus musculus OX=10090 GN=Dlat PE=1 SV=2	Dlat	67.941	0.975	0.971	0.981	1.12	1.112	1.051	1.048	1.054	1.014
Q8BMQ3	Zinc finger protein basonuclin-2 OS=Mus musculus OX=10090 GN=Bnc2 PE=1 SV=3	Bnc2	125.33	0.965	1.043	1.075	0.946	1.159	1.083	1.098	1.076	1.116
Q7TMC8	L-fucose kinase OS=Mus musculus OX=10090 GN=Fuk PE=1 SV=1	Fuk	119.27	0.944	0.975	0.955	0.964	0.948	0.865	0.991	0.989	0.896
Q922R8	Protein disulfide-isomerase A6 OS=Mus musculus OX=10090 GN=Pdia6 PE=1 SV=3	Pdia6	48.1	0.997	1.025	1.061	1.002	0.999	0.971	1.059	1.032	1.023
E9Q634	Unconventional myosin-Ie OS=Mus musculus OX=10090 GN=Myo1e PE=1 SV=1	Myo1e	126.82	0.971	1.103	1.037	1.166	1.061	1.135	1.106	1.045	0.994
O35963	Ras-related protein Rab-33B OS=Mus musculus OX=10090 GN=Rab33b PE=1 SV=1	Rab33b	25.766
Q8C0K5	Graves disease carrier protein homolog OS=Mus musculus OX=10090 GN=Slc25a16 PE=1 SV=1	Slc25a16	36.219		1.014	0.938		1.203	1.212		1.122	1.006
P56812	Programmed cell death protein 5 OS=Mus musculus OX=10090 GN=Pdcd5 PE=1 SV=3	Pdcd5	14.275		1.138	1.14		0.836	0.93		0.936	0.957
P47802	Metaxin-1 OS=Mus musculus OX=10090 GN=Mtx1 PE=1 SV=1	Mtx1	35.623	0.948	0.938	1.009	1.145	1.081	1.137	1.05	1.182	1.086
Q60934	Glutamate receptor ionotropic, kainate 1 OS=Mus musculus OX=10090 GN=Grik1 PE=2 SV=2	Grik1	95.201
Q69ZC8	GPALPP motifs-containing protein 1 OS=Mus musculus OX=10090 GN=Gpalpp1 PE=1 SV=2	Gpalpp1	38.954
P19536	Cytochrome c oxidase subunit 5B, mitochondrial OS=Mus musculus OX=10090 GN=Cox5b PE=1 SV=1	Cox5b	13.813	0.892	0.945	0.945	1.035	1.007	0.992	0.876	0.963	0.937
P23506	Protein-L-isoaspartate(D-aspartate) O-methyltransferase OS=Mus musculus OX=10090 GN=Pcmt1 PE=1 SV=3	Pcmt1	24.634	0.99	1.012	1.058	1.031	0.952	0.926	0.892	0.933	0.959
P29452	Caspase-1 OS=Mus musculus OX=10090 GN=Casp1 PE=1 SV=1	Casp1	45.64	0.878	0.87	0.886	0.916	0.931	0.94	0.914	0.897	0.858
Q8CH72	E3 ubiquitin-protein ligase TRIM32 OS=Mus musculus OX=10090 GN=Trim32 PE=1 SV=2	Trim32	72.057	1.037	0.982	0.975	1.155	1.044	1.049	1.087	0.975	1.044
Q8BZM1	Glomulin OS=Mus musculus OX=10090 GN=Glmn PE=1 SV=1	Glmn	67.755	1.154			1.058			1.148
Q9CZR8	Elongation factor Ts, mitochondrial OS=Mus musculus OX=10090 GN=Tsfm PE=1 SV=1	Tsfm	35.334	0.926	0.932	0.997	0.976	1.09	1.028	1.008	1.133	1.081
Q60692	Proteasome subunit beta type-6 OS=Mus musculus OX=10090 GN=Psmb6 PE=1 SV=3	Psmb6	25.378	1.003	1.057	1.018	0.974	0.89	0.886	1.027	0.968	1.011
Q6ZQ03	Formin-binding protein 4 OS=Mus musculus OX=10090 GN=Fnbp4 PE=1 SV=2	Fnbp4	111.24	1.01	0.947	1.124	1.007	0.974	0.912	0.997	1.041	1.032
P25976	Nucleolar transcription factor 1 OS=Mus musculus OX=10090 GN=Ubtf PE=1 SV=1	Ubtf	89.508	1.012	1.067	1.022	1.097	0.988	1.044	1.078	1.025	1.055
Q9DBY1	E3 ubiquitin-protein ligase synoviolin OS=Mus musculus OX=10090 GN=Syvn1 PE=1 SV=3	Syvn1	67.296	0.583	0.746	0.702	0.95	0.938	0.993	1.724	1.196	1.691
Q8CD92	Tetratricopeptide repeat protein 27 OS=Mus musculus OX=10090 GN=Ttc27 PE=1 SV=2	Ttc27	96.43	1.019	1.005	1.014	1.074	1.037	1.162	0.946	1.05	1.13
Q6DIC0	Probable global transcription activator SNF2L2 OS=Mus musculus OX=10090 GN=Smarca2 PE=1 SV=1	Smarca2	180.25
Q8BMD8	Calcium-binding mitochondrial carrier protein SCaMC-1 OS=Mus musculus OX=10090 GN=Slc25a24 PE=1 SV=1	Slc25a24	52.901	0.905	0.951	0.933	1.23	1.272	1.31	1.144	1.108	1.207
Q91WB4	Pleckstrin homology domain-containing family F member 2 OS=Mus musculus OX=10090 GN=Plekhf2 PE=1 SV=1	Plekhf2	27.754
Q8BMS4	Ubiquinone biosynthesis O-methyltransferase, mitochondrial OS=Mus musculus OX=10090 GN=Coq3 PE=1 SV=1	Coq3	40.956	0.959	0.948	1.016	0.993	1.047	0.939	0.997	0.984	1.001
Q80V26	Inositol monophosphatase 3 OS=Mus musculus OX=10090 GN=Impad1 PE=1 SV=1	Impad1	38.616	1.026	0.976	0.91	1.157	1.063	1.066	1.061	1.338	1.159
Q8K3G5	Inactive serine/threonine-protein kinase VRK3 OS=Mus musculus OX=10090 GN=Vrk3 PE=1 SV=2	Vrk3	50.829	0.875	0.955	0.949	0.821	0.92	0.874	0.846	0.885	0.9
Q9CQS4	Solute carrier family 25 member 46 OS=Mus musculus OX=10090 GN=Slc25a46 PE=1 SV=1	Slc25a46	46.224		0.878			0.87			1.308
Q6PEV3	WAS/WASL-interacting protein family member 2 OS=Mus musculus OX=10090 GN=Wipf2 PE=1 SV=1	Wipf2	46.297	1.07	1.004	1.121	1.013	0.968	0.961	0.853	0.925	0.874
Q922S8	Kinesin-like protein KIF2C OS=Mus musculus OX=10090 GN=Kif2c PE=1 SV=1	Kif2c	81.084	1.06	0.998	0.999	1.065	1.109	1.086	1.034	1.283	1.227
Q9D2V7	Coronin-7 OS=Mus musculus OX=10090 GN=Coro7 PE=1 SV=2	Coro7	100.81	0.981	0.929	0.933	0.927	0.957	0.983	0.878	0.959	0.932
P17426	AP-2 complex subunit alpha-1 OS=Mus musculus OX=10090 GN=Ap2a1 PE=1 SV=1	Ap2a1	107.66	1.054	1.067	1.077	0.971	0.989	0.983	1.02	1.011	0.996
Q9D1C9	Ribosomal RNA-processing protein 7 homolog A OS=Mus musculus OX=10090 GN=Rrp7a PE=2 SV=1	Rrp7a	32.399		1.103	1.066		1.165	1.181		1.112	0.981
Q9CXT8	Mitochondrial-processing peptidase subunit beta OS=Mus musculus OX=10090 GN=Pmpcb PE=1 SV=1	Pmpcb	54.614	1.033	1.017	1.025	0.979	1.04	1.022	0.963	1.01	1.026
E9Q942	Small integral membrane protein 13 OS=Mus musculus OX=10090 GN=Smim13 PE=1 SV=1	Smim13	9.9543
Q9ET26	E3 ubiquitin-protein ligase RNF114 OS=Mus musculus OX=10090 GN=Rnf114 PE=1 SV=2	Rnf114	25.745	0.984	0.97	1.073	0.915	1.062	1.01	0.852	1.096	1.039
Q8R1Q9	Ribokinase OS=Mus musculus OX=10090 GN=Rbks PE=1 SV=1	Rbks	34.119		0.871	1.245		0.762	1.206		0.997	1.033
Q9WUU6	Hepatocyte nuclear factor 4-gamma OS=Mus musculus OX=10090 GN=Hnf4g PE=2 SV=2	Hnf4g	45.896	0.901	0.905	0.875	1.105	1.131	1.013	0.98	1.003	0.893
A2ACP1	Tetratricopeptide repeat protein 39A OS=Mus musculus OX=10090 GN=Ttc39a PE=2 SV=1	Ttc39a	66.126		0.948			0.934			1.032
Q923D2	Flavin reductase (NADPH) OS=Mus musculus OX=10090 GN=Blvrb PE=1 SV=3	Blvrb	22.197	1.057			0.951			1.098
P97379	Ras GTPase-activating protein-binding protein 2 OS=Mus musculus OX=10090 GN=G3bp2 PE=1 SV=2	G3bp2	54.087	1.089	1.02	1.077	0.869	0.942	1.003	1.042	1	0.983
Q02013	Aquaporin-1 OS=Mus musculus OX=10090 GN=Aqp1 PE=1 SV=3	Aqp1	28.793	0.963	0.795	0.817	0.92	0.841	0.841	1.095	0.937	0.905
Q60953	Protein PML OS=Mus musculus OX=10090 GN=Pml PE=1 SV=3	Pml	98.241	1.122		1.03	1.112		1.105	0.993		1.117
Q05CL8	La-related protein 7 OS=Mus musculus OX=10090 GN=Larp7 PE=1 SV=2	Larp7	64.802	0.99	1.068	1.026	0.924	0.835	0.915	1.118	1.134	1.018
P57780	Alpha-actinin-4 OS=Mus musculus OX=10090 GN=Actn4 PE=1 SV=1	Actn4	104.98	1.059	1.056	1.039	0.976	0.951	0.941	0.966	0.951	0.998
P70297	Signal transducing adapter molecule 1 OS=Mus musculus OX=10090 GN=Stam PE=1 SV=3	Stam	59.771	0.976	1.035	1.009	0.983	0.806	0.929	0.932	0.823	0.991
Q9Z0Z3	S-phase kinase-associated protein 2 OS=Mus musculus OX=10090 GN=Skp2 PE=1 SV=1	Skp2	47.766	0.879			1.124			1.08
Q9QXS1	Plectin OS=Mus musculus OX=10090 GN=Plec PE=1 SV=3	Plec	534.18	1.09	1.131	1.114	1.231	1.247	1.268	1.22	1.173	1.223
Q6ZWQ7	Signal peptidase complex subunit 3 OS=Mus musculus OX=10090 GN=Spcs3 PE=1 SV=1	Spcs3	20.313	0.917	0.914	0.947	1.127	1.128	1.167	1.039	1.031	1.041
Q9D8B6	Protein FAM210B, mitochondrial OS=Mus musculus OX=10090 GN=Fam210b PE=1 SV=3	Fam210b	20.344	0.851	0.825	0.846	1.079	1.002	1.014	0.952	1.002	1.132
P84228	Histone H3.2 OS=Mus musculus OX=10090 GN=Hist1h3b PE=1 SV=2	Hist1h3b	15.388	0.734	0.885		0.812	0.962		1.502	1.285
Q91YT8	CSC1-like protein 1 OS=Mus musculus OX=10090 GN=Tmem63a PE=1 SV=1	Tmem63a	91.859
Q99MB7	RING finger protein 141 OS=Mus musculus OX=10090 GN=Rnf141 PE=1 SV=2	Rnf141	25.529
Q91VU1	Protein YIPF1 OS=Mus musculus OX=10090 GN=Yipf1 PE=2 SV=1	Yipf1	34.257			0.95			1.097			1.035
P51163	Uroporphyrinogen-III synthase OS=Mus musculus OX=10090 GN=Uros PE=1 SV=1	Uros	28.504
Q6PDL0	Cytoplasmic dynein 1 light intermediate chain 2 OS=Mus musculus OX=10090 GN=Dync1li2 PE=1 SV=2	Dync1li2	54.218	1.03	1.05	1.036	0.998	1.083	0.961	1.147	1.059	1.035
A2A9T0	TANK-binding kinase 1-binding protein 1 OS=Mus musculus OX=10090 GN=Tbkbp1 PE=1 SV=1	Tbkbp1	67.001	1.118			0.978			1.03
P20060	Beta-hexosaminidase subunit beta OS=Mus musculus OX=10090 GN=Hexb PE=1 SV=2	Hexb	61.115	0.907	0.975	0.956	0.854	0.814	0.796	0.838	0.831	0.81
Q9CQ69	Cytochrome b-c1 complex subunit 8 OS=Mus musculus OX=10090 GN=Uqcrq PE=1 SV=3	Uqcrq	9.7681	0.883	0.904	0.885	1.098	1.025	1.121	0.903	0.931	0.955
P45377	Aldose reductase-related protein 2 OS=Mus musculus OX=10090 GN=Akr1b8 PE=1 SV=2	Akr1b8	36.12	1.094	1.07	1.137	1.157	1.12	1.044	1.076	1.113	0.989
Q8K021	Secretory carrier-associated membrane protein 1 OS=Mus musculus OX=10090 GN=Scamp1 PE=1 SV=1	Scamp1	38.028	0.978	0.828	1.043	0.955	1.02	1.053	0.908	1.076	1.038
Q9JKF6	Nectin-1 OS=Mus musculus OX=10090 GN=Nectin1 PE=1 SV=3	Nectin1	57.034
Q9WTU6	Mitogen-activated protein kinase 9 OS=Mus musculus OX=10090 GN=Mapk9 PE=1 SV=2	Mapk9	48.189	1.016			1.087			0.92
Q921K8	TRPM8 channel-associated factor 2 OS=Mus musculus OX=10090 GN=Tcaf2 PE=1 SV=1	Tcaf2	101.6	0.908	0.83	0.95	0.968	1.2	0.977	0.982	0.973	1.145
P20029	Endoplasmic reticulum chaperone BiP OS=Mus musculus OX=10090 GN=Hspa5 PE=1 SV=3	Hspa5	72.421	1.036	1.023	1.029	1.087	1.096	1.078	1.067	1.083	1.055
Q61881	DNA replication licensing factor MCM7 OS=Mus musculus OX=10090 GN=Mcm7 PE=1 SV=1	Mcm7	81.21	0.992	1.008	0.985	0.992	1.035	1.001	1.076	1.072	1.116
Q9CQQ7	ATP synthase F(0) complex subunit B1, mitochondrial OS=Mus musculus OX=10090 GN=Atp5f1 PE=1 SV=1	Atp5f1	28.948	0.873	0.913	0.882	1.132	1.087	1.102	1.104	1.11	1.088
Q9DBX6	Cytochrome P450 2S1 OS=Mus musculus OX=10090 GN=Cyp2s1 PE=1 SV=1	Cyp2s1	55.631	0.938	0.895	0.883	1.1	1.094	1.081	1.014	1.034	0.99
P55012	Solute carrier family 12 member 2 OS=Mus musculus OX=10090 GN=Slc12a2 PE=1 SV=2	Slc12a2	131.03	0.878	0.884	0.892	0.773	0.685	0.758	0.849	0.79	0.853
Q9CZ44	NSFL1 cofactor p47 OS=Mus musculus OX=10090 GN=Nsfl1c PE=1 SV=1	Nsfl1c	40.709	1.001	1.007	1.048	0.848	0.87	0.846	0.96	1.045	0.915
Q4VBE8	WD repeat-containing protein 18 OS=Mus musculus OX=10090 GN=Wdr18 PE=1 SV=1	Wdr18	47.211	1.059	1.02	1.009	1.093	1.092	1.183	1.088	1.087	1.154
P97823	Acyl-protein thioesterase 1 OS=Mus musculus OX=10090 GN=Lypla1 PE=1 SV=1	Lypla1	24.687	0.974	0.968	0.948	0.871	0.759	0.903	0.882	0.887	0.921
Q9DBV3	Probable ATP-dependent RNA helicase DHX34 OS=Mus musculus OX=10090 GN=Dhx34 PE=1 SV=2	Dhx34	128.51
Q8R1U1	Conserved oligomeric Golgi complex subunit 4 OS=Mus musculus OX=10090 GN=Cog4 PE=1 SV=1	Cog4	88.66	0.967	0.918	0.91	1.135	1.097	1.12	1.145	1.19	1.082
Q8QZT1	Acetyl-CoA acetyltransferase, mitochondrial OS=Mus musculus OX=10090 GN=Acat1 PE=1 SV=1	Acat1	44.816	0.998	0.991	1.047	0.978	0.976	0.973	0.978	0.951	0.915
B1AY10	Transcriptional repressor NF-X1 OS=Mus musculus OX=10090 GN=Nfx1 PE=1 SV=1	Nfx1	123.81		0.987			1.099			1.172
Q3U2I3	FTS and Hook-interacting protein OS=Mus musculus OX=10090 GN=Fam160a2 PE=1 SV=2	Fam160a2	106.54		1.037			1.124			1.255
Q9D5V6	Synapse-associated protein 1 OS=Mus musculus OX=10090 GN=Syap1 PE=1 SV=1	Syap1	41.349	1.044	1.028	1.005	0.913	0.92	0.957	0.856	0.911	1.002
P43406	Integrin alpha-V OS=Mus musculus OX=10090 GN=Itgav PE=1 SV=2	Itgav	115.36		1.016	1.015		1.171	1.116		1.085	0.968
Q9D7B6	Isobutyryl-CoA dehydrogenase, mitochondrial OS=Mus musculus OX=10090 GN=Acad8 PE=1 SV=2	Acad8	45.019	0.922	0.913	0.928	0.996	0.981	1.001	1.006	1.089	0.973
P25425	POU domain, class 2, transcription factor 1 OS=Mus musculus OX=10090 GN=Pou2f1 PE=1 SV=3	Pou2f1	79.546
Q3U308	Cytoplasmic tRNA 2-thiolation protein 2 OS=Mus musculus OX=10090 GN=Ctu2 PE=1 SV=1	Ctu2	56.104	0.996	0.981	0.991	1.011	1.047	0.979	1.004	1.007	0.941
Q61739	Integrin alpha-6 OS=Mus musculus OX=10090 GN=Itga6 PE=1 SV=3	Itga6	122.16	1.001	1.042	0.999	1.047	1.101	1.123	1.014	1.028	1.092
Q921W4	Quinone oxidoreductase-like protein 1 OS=Mus musculus OX=10090 GN=Cryzl1 PE=1 SV=1	Cryzl1	38.725	1.004	0.958		1.125	0.95		1.326	1.019
O55028	[3-methyl-2-oxobutanoate dehydrogenase [lipoamide]] kinase, mitochondrial OS=Mus musculus OX=10090 GN=Bckdk PE=1 SV=1	Bckdk	46.587	0.942	1.372	0.945	0.94	1.145	1.034	1.071	0.99	1.053
Q6PDI5	Proteasome adapter and scaffold protein ECM29 OS=Mus musculus OX=10090 GN=Ecpas PE=1 SV=3	Ecpas	203.7	0.979	0.951	0.953	1.002	1.003	1.059	0.979	1.002	1.053
G3X9J0	Signal-induced proliferation-associated 1-like protein 3 OS=Mus musculus OX=10090 GN=Sipa1l3 PE=1 SV=1	Sipa1l3	195.06		1.08			1.031			1.101
Q64261	Cyclin-dependent kinase 6 OS=Mus musculus OX=10090 GN=Cdk6 PE=1 SV=2	Cdk6	37.028	0.847	0.843	0.917	0.838	0.964	0.983	0.936	0.906	1.012
Q80W00	Serine/threonine-protein phosphatase 1 regulatory subunit 10 OS=Mus musculus OX=10090 GN=Ppp1r10 PE=1 SV=1	Ppp1r10	94.371	1.084	1.06	1.065	0.974	0.889	0.921	1.002	0.998	1.063
Q8BU14	Translocation protein SEC62 OS=Mus musculus OX=10090 GN=Sec62 PE=1 SV=1	Sec62	45.58	0.998	0.984	1.011	1.078	1.033	1.089	1.036	0.986	1.006
Q3TQI7	Telomere length and silencing protein 1 homolog OS=Mus musculus OX=10090 PE=1 SV=2	---	33.543	1.028	1.075		0.904	0.999		1.059	1.09
Q99K74	Mediator of RNA polymerase II transcription subunit 24 OS=Mus musculus OX=10090 GN=Med24 PE=1 SV=1	Med24	109.98			1.007			1.202			0.957
Q8R003	Muscleblind-like protein 3 OS=Mus musculus OX=10090 GN=Mbnl3 PE=2 SV=1	Mbnl3	37.57	0.847	0.813	0.833	0.925	0.943	1.013	1.246	1.229	1.258
Q9QYB1	Chloride intracellular channel protein 4 OS=Mus musculus OX=10090 GN=Clic4 PE=1 SV=3	Clic4	28.729	1.152	1.04		1.056	1.088		1.159	1.028
Q10738	Matrilysin OS=Mus musculus OX=10090 GN=Mmp7 PE=2 SV=1	Mmp7	29.755	0.935	0.96	0.977	1.042	0.96	0.961	0.94	0.844	0.939
P35293	Ras-related protein Rab-18 OS=Mus musculus OX=10090 GN=Rab18 PE=1 SV=2	Rab18	23.035	0.937	0.965	0.917	1.091	1.075	1.058	0.968	0.947	0.952
P84078	ADP-ribosylation factor 1 OS=Mus musculus OX=10090 GN=Arf1 PE=1 SV=2	Arf1	20.697	1.009	0.975	0.996	0.966	0.946	0.944	0.896	0.948	0.875
Q62313	Trans-Golgi network integral membrane protein 1 OS=Mus musculus OX=10090 GN=Tgoln1 PE=1 SV=1	Tgoln1	37.848	0.858	0.841		1.147	1.095		1.121	1.255
P97302	Transcription regulator protein BACH1 OS=Mus musculus OX=10090 GN=Bach1 PE=1 SV=1	Bach1	81.373
Q3URD3	Sarcolemmal membrane-associated protein OS=Mus musculus OX=10090 GN=Slmap PE=1 SV=2	Slmap	96.932		0.988	0.681		0.994	0.91		1.028	1.396
Q8BXZ1	Protein disulfide-isomerase TMX3 OS=Mus musculus OX=10090 GN=Tmx3 PE=1 SV=2	Tmx3	51.847	1.012	0.974	0.93	1.011	1.187	1.092	1.176	1.082	1.11
A2AGT5	Cytoskeleton-associated protein 5 OS=Mus musculus OX=10090 GN=Ckap5 PE=1 SV=1	Ckap5	225.63	1.117	1.049	1.088	1.045	1.037	1.009	1.048	1.036	1.075
P63017	Heat shock cognate 71 kDa protein OS=Mus musculus OX=10090 GN=Hspa8 PE=1 SV=1	Hspa8	70.87	1.125	1.106	1.133	0.967	0.96	0.956	1.038	1.014	1.027
O08688	Calpain-5 OS=Mus musculus OX=10090 GN=Capn5 PE=1 SV=1	Capn5	72.954	1.05	1.12		1.064	1.063		1.165	1.017
Q3SXD3	HD domain-containing protein 2 OS=Mus musculus OX=10090 GN=Hddc2 PE=1 SV=1	Hddc2	22.753		1.152	0.976		1.065	0.94		1.254	0.88
Q71FD5	E3 ubiquitin-protein ligase ZNRF2 OS=Mus musculus OX=10090 GN=Znrf2 PE=1 SV=1	Znrf2	23.705		0.925			0.854			0.968
Q8VCP8	Adenylate kinase isoenzyme 6 OS=Mus musculus OX=10090 GN=Ak6 PE=1 SV=1	Ak6	19.947			1.02			1.141			1.113
O54833	Casein kinase II subunit alpha' OS=Mus musculus OX=10090 GN=Csnk2a2 PE=1 SV=1	Csnk2a2	41.215	0.86	0.981	0.976	1.139	1.141	1.159	0.987	0.996	1.093
Q3TZZ7	Extended synaptotagmin-2 OS=Mus musculus OX=10090 GN=Esyt2 PE=1 SV=1	Esyt2	94.138	1.024	0.971	1.027	1.237	1.172	1.153	1.072	1.171	1.063
Q61749	Translation initiation factor eIF-2B subunit delta OS=Mus musculus OX=10090 GN=Eif2b4 PE=1 SV=2	Eif2b4	57.624	0.791	0.948	0.939	0.966	1.068	1.042	1.306	1.289	1.095
Q8R1F0	Leydig cell tumor 10 kDa protein homolog OS=Mus musculus OX=10090 GN=D8Ertd738e PE=3 SV=1	D8Ertd738e	10.197	1.022	0.994	0.966	0.942	0.951	0.954	1.235	1.139	1.203
Q9CPP0	Nucleoplasmin-3 OS=Mus musculus OX=10090 GN=Npm3 PE=1 SV=3	Npm3	19.023	0.938	0.979		1.182	1.016		1.125	1.091
O54950	5'-AMP-activated protein kinase subunit gamma-1 OS=Mus musculus OX=10090 GN=Prkag1 PE=1 SV=2	Prkag1	37.52	1	1.053	1.016	1.092	1.012	1.131	0.961	1.124	1.055
Q9Z0R9	Fatty acid desaturase 2 OS=Mus musculus OX=10090 GN=Fads2 PE=1 SV=1	Fads2	52.387	1.085	1.029	1.025	0.962	1.008	1.008	0.984	1.059	1.027
Q99KF1	Transmembrane emp24 domain-containing protein 9 OS=Mus musculus OX=10090 GN=Tmed9 PE=1 SV=2	Tmed9	27.127	0.998	0.966	0.999	1.106	1.147	1.112	1.018	1.018	1.038
Q61696	Heat shock 70 kDa protein 1A OS=Mus musculus OX=10090 GN=Hspa1a PE=1 SV=2	Hspa1a	70.078		1.579	1.579		1.809	1.653		1.877	1.795
Q8VEA4	Mitochondrial intermembrane space import and assembly protein 40 OS=Mus musculus OX=10090 GN=Chchd4 PE=1 SV=1	Chchd4	15.525	1.042	1	1.04	0.97	0.974	0.918	0.99	1.148	1.035
Q9CQP2	Trafficking protein particle complex subunit 2 OS=Mus musculus OX=10090 GN=Trappc2 PE=1 SV=1	Trappc2	16.441	1.091	1.042		1.159	1.125		0.961	0.968
Q9Z1N2	Origin recognition complex subunit 1 OS=Mus musculus OX=10090 GN=Orc1 PE=1 SV=2	Orc1	95.102	1.055	1.005	1.081	0.958	1.004	1.077	1.106	1.164	1.069
Q80UJ1	Solute carrier family 22 member 20 OS=Mus musculus OX=10090 GN=Slc22a20 PE=1 SV=1	Slc22a20	60.944
P04186	Complement factor B OS=Mus musculus OX=10090 GN=Cfb PE=1 SV=2	Cfb	85.004	0.948	0.938	0.987	0.799	0.757	0.936	0.889	0.82	0.963
Q9DBN4	Putative monooxygenase p33MONOX OS=Mus musculus OX=10090 GN=P33monox PE=1 SV=1	P33monox	32.715
P70210	Transcriptional enhancer factor TEF-5 OS=Mus musculus OX=10090 GN=Tead3 PE=2 SV=2	Tead3	48.937
Q6ZPU9	KIF1-binding protein OS=Mus musculus OX=10090 GN=Kif1bp PE=1 SV=2	Kif1bp	71.051			1.027			0.983			1.011
Q9EST4	Proteasome assembly chaperone 2 OS=Mus musculus OX=10090 GN=Psmg2 PE=1 SV=1	Psmg2	29.524	0.981	0.992	1.006	0.944	0.919	0.986	0.82	0.901	0.962
Q9QZE5	Coatomer subunit gamma-1 OS=Mus musculus OX=10090 GN=Copg1 PE=1 SV=1	Copg1	97.512	0.994	0.996	0.998	0.987	1.017	1.024	0.946	1.037	0.975
O55229	Choline/ethanolamine kinase OS=Mus musculus OX=10090 GN=Chkb PE=1 SV=3	Chkb	45.126
Q6PB97	F-box/LRR-repeat protein 19 OS=Mus musculus OX=10090 GN=Fbxl19 PE=2 SV=1	Fbxl19	73.787
Q61425	Hydroxyacyl-coenzyme A dehydrogenase, mitochondrial OS=Mus musculus OX=10090 GN=Hadh PE=1 SV=2	Hadh	34.463	0.851	0.87	0.875	0.774	0.742	0.744	0.846	0.839	0.813
Q571E4	N-acetylgalactosamine-6-sulfatase OS=Mus musculus OX=10090 GN=Galns PE=1 SV=2	Galns	57.673	1.009	0.908		0.904	1.031		1.123	1.368
Q3V009	Transmembrane emp24 domain-containing protein 1 OS=Mus musculus OX=10090 GN=Tmed1 PE=1 SV=1	Tmed1	25.262	0.981	0.989	1.008	1.187	1.224	1.082	0.915	0.94	1.071
Q9EPK6	Nucleotide exchange factor SIL1 OS=Mus musculus OX=10090 GN=Sil1 PE=1 SV=2	Sil1	52.429
Q8CHT0	Delta-1-pyrroline-5-carboxylate dehydrogenase, mitochondrial OS=Mus musculus OX=10090 GN=Aldh4a1 PE=1 SV=3	Aldh4a1	61.84
Q9ER88	28S ribosomal protein S29, mitochondrial OS=Mus musculus OX=10090 GN=Dap3 PE=1 SV=1	Dap3	44.699	0.916	0.98	0.961	1.079	1.052	0.961	1.008	0.962	1.01
Q4LDD4	Arf-GAP with Rho-GAP domain, ANK repeat and PH domain-containing protein 1 OS=Mus musculus OX=10090 GN=Arap1 PE=1 SV=2	Arap1	162.27	1.023	1.067		1.266	1.012		0.881	1.015
P56654	Cytochrome P450 2C37 OS=Mus musculus OX=10090 GN=Cyp2c37 PE=1 SV=2	Cyp2c37	55.606
Q99LG2	Transportin-2 OS=Mus musculus OX=10090 GN=Tnpo2 PE=1 SV=1	Tnpo2	100.46	1.079	0.959	1.013	1.029	1.137	1.144	1.063	1.152	1.125
Q8BTF7	DNA ligase 4 OS=Mus musculus OX=10090 GN=Lig4 PE=2 SV=2	Lig4	104.12	0.953			0.976			0.985
Q9D8Y8	Inhibitor of growth protein 5 OS=Mus musculus OX=10090 GN=Ing5 PE=1 SV=1	Ing5	27.798		1.005			1.148			1.181
A2CG63	AT-rich interactive domain-containing protein 4B OS=Mus musculus OX=10090 GN=Arid4b PE=1 SV=1	Arid4b	147.64	1.005			1.075			1.087
Q8C156	Condensin complex subunit 2 OS=Mus musculus OX=10090 GN=Ncaph PE=1 SV=1	Ncaph	82.302	1.009	1.029	1.051	1.061	1.047	1.013	0.985	1.054	0.984
C0HKG6	Ribonuclease T2-B OS=Mus musculus OX=10090 GN=Rnaset2b PE=1 SV=1	Rnaset2b	29.608
Q8BI84	Transport and Golgi organization protein 1 homolog OS=Mus musculus OX=10090 GN=Mia3 PE=1 SV=2	Mia3	213.67	1.043	0.969	1.027	0.962	1.013	1.034	1.063	1.034	1.044
Q9CQU0	Thioredoxin domain-containing protein 12 OS=Mus musculus OX=10090 GN=Txndc12 PE=1 SV=1	Txndc12	19.048	1.009	1	1.014	0.971	0.968	1.029	1.046	1.074	1
Q8K419	Galectin-4 OS=Mus musculus OX=10090 GN=Lgals4 PE=1 SV=2	Lgals4	36.371	0.996	0.985	0.986	0.975	0.985	0.969	0.954	0.93	0.908
Q3TDQ1	Dolichyl-diphosphooligosaccharide--protein glycosyltransferase subunit STT3B OS=Mus musculus OX=10090 GN=Stt3b PE=1 SV=2	Stt3b	93.245	0.874	0.926	0.871	1.055	1.073	1.173	1.23	1.054	1.15
Q8BK30	NADH dehydrogenase [ubiquinone] flavoprotein 3, mitochondrial OS=Mus musculus OX=10090 GN=Ndufv3 PE=1 SV=1	Ndufv3	11.813	1.014	0.941	0.977	0.961	1.049	0.953	0.985	0.949	1.075
Q8VDQ8	NAD-dependent protein deacetylase sirtuin-2 OS=Mus musculus OX=10090 GN=Sirt2 PE=1 SV=2	Sirt2	43.256
P25799	Nuclear factor NF-kappa-B p105 subunit OS=Mus musculus OX=10090 GN=Nfkb1 PE=1 SV=2	Nfkb1	105.61		0.844			0.938			1.023
P58269	Zinc finger protein DPF3 OS=Mus musculus OX=10090 GN=Dpf3 PE=1 SV=2	Dpf3	43.07
Q5SW19	Clustered mitochondria protein homolog OS=Mus musculus OX=10090 GN=Cluh PE=1 SV=2	Cluh	148.07	1.039	1.033	1.018	0.978	1.007	1.026	1.048	1.044	1.012
P62858	40S ribosomal protein S28 OS=Mus musculus OX=10090 GN=Rps28 PE=1 SV=1	Rps28	7.8409	0.858	0.954	0.863	1.02	1.087	1.044	1.457	1.376	1.591
Q9QZB7	Actin-related protein 10 OS=Mus musculus OX=10090 GN=Actr10 PE=1 SV=2	Actr10	46.207	1.015	1.056	0.937	0.969	0.946	0.965	0.887	1.009	0.799
Q8BGA5	KRR1 small subunit processome component homolog OS=Mus musculus OX=10090 GN=Krr1 PE=2 SV=1	Krr1	43.537	1.035	1.071	1.025	1.066	1.044	1.125	1.124	1.072	1.156
A2RSX7	tRNA wybutosine-synthesizing protein 5 OS=Mus musculus OX=10090 GN=Tyw5 PE=2 SV=2	Tyw5	36.632
Q64737	Trifunctional purine biosynthetic protein adenosine-3 OS=Mus musculus OX=10090 GN=Gart PE=1 SV=3	Gart	107.5	1.001	1.006	1.011	0.969	0.931	0.91	0.993	0.957	0.961
Q3UPR7	Transmembrane protein 102 OS=Mus musculus OX=10090 GN=Tmem102 PE=1 SV=2	Tmem102	54.922	1.045	0.93	1.109	1.017	0.907	0.894	1.055	0.964	0.958
Q921I0	ORM1-like protein 1 OS=Mus musculus OX=10090 GN=Ormdl1 PE=2 SV=1	Ormdl1	17.355	1.038	1.018	1.018	1.111	1.174	1.193	1.146	1.139	1.094
Q9DBL7	Bifunctional coenzyme A synthase OS=Mus musculus OX=10090 GN=Coasy PE=1 SV=2	Coasy	62.022	0.886	0.929	0.911	0.933	0.907	0.894	0.909	1.028	0.9
O35127	Protein C10 OS=Mus musculus OX=10090 GN=Grcc10 PE=1 SV=1	Grcc10	13.194	0.976	0.967		1.044	1.025		0.942	0.987
P54728	UV excision repair protein RAD23 homolog B OS=Mus musculus OX=10090 GN=Rad23b PE=1 SV=2	Rad23b	43.512	1.07	1.095	1.101	0.94	0.854	0.904	0.944	0.886	0.916
Q9JLB0	MAGUK p55 subfamily member 6 OS=Mus musculus OX=10090 GN=Mpp6 PE=1 SV=1	Mpp6	62.63	1.04	1.001	1.013	1.027	1.039	1.024	1.126	1.127	1.068
Q64735	Complement component receptor 1-like protein OS=Mus musculus OX=10090 GN=Cr1l PE=1 SV=1	Cr1l	53.762	1.107		1.142	1.16		1.045	0.971		0.949
Q8R4D1	Sodium/hydrogen exchanger 8 OS=Mus musculus OX=10090 GN=Slc9a8 PE=1 SV=1	Slc9a8	64.736
Q8CHP8	Glycerol-3-phosphate phosphatase OS=Mus musculus OX=10090 GN=Pgp PE=1 SV=1	Pgp	34.54	0.997	0.983	0.999	0.685	0.779	0.79	0.756	0.945	0.787
P31428	Dipeptidase 1 OS=Mus musculus OX=10090 GN=Dpep1 PE=1 SV=2	Dpep1	45.722	0.999	0.89	0.846	1.025	0.914	0.9	0.97	1	0.894
Q80YV2	Nuclear-interacting partner of ALK OS=Mus musculus OX=10090 GN=Zc3hc1 PE=1 SV=1	Zc3hc1	55.196	0.99	1.046	1.046	1.111	1.108	1.052	0.997	1.049	1.132
P60904	DnaJ homolog subfamily C member 5 OS=Mus musculus OX=10090 GN=Dnajc5 PE=1 SV=1	Dnajc5	22.101	0.882	0.87	0.964	1.1	1.078	1.237	1.293	1.325	1.123
Q9R1P4	Proteasome subunit alpha type-1 OS=Mus musculus OX=10090 GN=Psma1 PE=1 SV=1	Psma1	29.546	1.01	1.04	0.983	0.877	0.843	0.83	0.85	0.964	0.893
Q8VEK3	Heterogeneous nuclear ribonucleoprotein U OS=Mus musculus OX=10090 GN=Hnrnpu PE=1 SV=1	Hnrnpu	87.917	0.972	0.989	1.005	1.017	0.965	1.01	1.019	1.042	0.993
Q9DBS5	Kinesin light chain 4 OS=Mus musculus OX=10090 GN=Klc4 PE=1 SV=1	Klc4	68.612	0.967	0.947	0.962	0.979	0.994	0.917	0.97	0.943	0.936
Q6NZB0	DnaJ homolog subfamily C member 8 OS=Mus musculus OX=10090 GN=Dnajc8 PE=1 SV=2	Dnajc8	29.812	1.017	1.032	1.044	0.831	0.864	0.883	0.921	0.968	0.868
P59242	Cingulin OS=Mus musculus OX=10090 GN=Cgn PE=1 SV=1	Cgn	136.45	1.008	0.986	0.988	1.058	1.011	1.035	0.962	1.005	1.058
O08583	THO complex subunit 4 OS=Mus musculus OX=10090 GN=Alyref PE=1 SV=3	Alyref	26.94	1.065	1.117	1.072	0.913	0.873	0.902	0.988	1.024	1.02
Q9WV76	AP-4 complex subunit beta-1 OS=Mus musculus OX=10090 GN=Ap4b1 PE=1 SV=2	Ap4b1	82.975
Q6PCM2	Integrator complex subunit 6 OS=Mus musculus OX=10090 GN=Ints6 PE=1 SV=1	Ints6	99.66	1.014	1.027	0.993	1.082	1.084	1.073	1.054	1.096	0.987
Q9Z0S1	3'(2'),5'-bisphosphate nucleotidase 1 OS=Mus musculus OX=10090 GN=Bpnt1 PE=1 SV=2	Bpnt1	33.196	0.913	0.909	0.894	0.834	0.775	0.749	0.874	0.818	0.785
Q3UP75	UDP-glucuronosyltransferase 3A1 OS=Mus musculus OX=10090 GN=Ugt3a1 PE=1 SV=1	Ugt3a1	59.698			0.63			0.948			1.325
Q8K1A0	Methyltransferase-like protein 5 OS=Mus musculus OX=10090 GN=Mettl5 PE=2 SV=2	Mettl5	23.662
Q3U1V6	Ubiquitin-conjugating enzyme E2 variant 3 OS=Mus musculus OX=10090 GN=Uevld PE=1 SV=1	Uevld	51.681			0.962			1.094			1.053
Q8C0D9	Centrosomal protein of 68 kDa OS=Mus musculus OX=10090 GN=Cep68 PE=1 SV=2	Cep68	78.748	0.842	0.726	0.696	0.849	0.696	0.742	0.907	0.729	0.717
Q9ESZ8	General transcription factor II-I OS=Mus musculus OX=10090 GN=Gtf2i PE=1 SV=3	Gtf2i	112.26	0.958	0.982	0.943	1.039	0.979	0.948	0.981	0.977	0.963
Q9R0B9	Procollagen-lysine,2-oxoglutarate 5-dioxygenase 2 OS=Mus musculus OX=10090 GN=Plod2 PE=1 SV=2	Plod2	84.487	1.164	1.101	1.186	1.528	1.741	1.635	1.618	1.793	1.658
Q6P5G6	UBX domain-containing protein 7 OS=Mus musculus OX=10090 GN=Ubxn7 PE=1 SV=2	Ubxn7	52.164	1.012			1.042			0.999
O88425	Nucleoside diphosphate kinase 6 OS=Mus musculus OX=10090 GN=Nme6 PE=1 SV=1	Nme6	21.778	1.01	1.057		1.024	0.946		0.999	1.006
O88554	Poly [ADP-ribose] polymerase 2 OS=Mus musculus OX=10090 GN=Parp2 PE=1 SV=3	Parp2	63.396	1.027	0.951	0.937	1.066	0.983	0.963	0.913	0.939	0.801
Q9CQ90	Uncharacterized protein C9orf85 homolog OS=Mus musculus OX=10090 PE=2 SV=1	---	17.73	0.966	0.99	1.038	0.871	0.949	0.897	1.151	1.132	1.009
Q6ZQM8	UDP-glucuronosyltransferase 1-7C OS=Mus musculus OX=10090 GN=Ugt1a7c PE=1 SV=1	Ugt1a7c	59.757	0.856	0.874	0.845	0.991	1.013	0.96	0.958	0.986	1
Q9CPS7	RNA-binding protein PNO1 OS=Mus musculus OX=10090 GN=Pno1 PE=1 SV=1	Pno1	27.453	1.029			1.153			1.075
Q9CPT3	N-acylneuraminate-9-phosphatase OS=Mus musculus OX=10090 GN=Nanp PE=1 SV=1	Nanp	27.808	0.971			0.848			0.911
Q8BHG9	CGG triplet repeat-binding protein 1 OS=Mus musculus OX=10090 GN=Cggbp1 PE=1 SV=1	Cggbp1	18.761	1.07	1.062	1.086	0.891	0.874	0.879	0.961	0.985	0.95
Q9CQW5	Galectin-2 OS=Mus musculus OX=10090 GN=Lgals2 PE=1 SV=1	Lgals2	14.88	0.966	0.982	0.959	0.904	0.936	0.913	0.85	0.89	0.853
P50396	Rab GDP dissociation inhibitor alpha OS=Mus musculus OX=10090 GN=Gdi1 PE=1 SV=3	Gdi1	50.521	1.027	1.143		0.852	0.895		0.87	1.068
O09131	Glutathione S-transferase omega-1 OS=Mus musculus OX=10090 GN=Gsto1 PE=1 SV=2	Gsto1	27.497	0.887	0.874	0.869	0.697	0.7	0.701	0.71	0.746	0.73
Q91YE7	RNA-binding protein 5 OS=Mus musculus OX=10090 GN=Rbm5 PE=1 SV=1	Rbm5	92.31	1.057	1.067	0.975	0.988	0.901	1.158	1.059	1.014	1.037
Q99JR1	Sideroflexin-1 OS=Mus musculus OX=10090 GN=Sfxn1 PE=1 SV=3	Sfxn1	35.649	0.903	0.894	0.911	1.065	1.047	1.005	1.098	1.116	1.054
P48760	Folylpolyglutamate synthase, mitochondrial OS=Mus musculus OX=10090 GN=Fpgs PE=1 SV=3	Fpgs	64.955		0.892	0.956		1.061	1.127		1.281	1.201
Q8BG15	CTD small phosphatase-like protein 2 OS=Mus musculus OX=10090 GN=Ctdspl2 PE=1 SV=1	Ctdspl2	52.812	1.141	0.984	1.141	0.945	1.095	0.926	1.14	1.012	0.985
Q80UG5	Septin-9 OS=Mus musculus OX=10090 GN=Sept9 PE=1 SV=1	Sept9	65.574	1.003	1.016	0.976	0.953	0.935	0.966	1.051	1.014	0.936
Q99KP3	Lambda-crystallin homolog OS=Mus musculus OX=10090 GN=Cryl1 PE=1 SV=3	Cryl1	35.208	0.843	0.813	0.866	0.761	0.71	0.753	0.709	0.797	0.791
Q3TIR3	Synembryn-A OS=Mus musculus OX=10090 GN=Ric8a PE=1 SV=2	Ric8a	59.846
P97386	DNA ligase 3 OS=Mus musculus OX=10090 GN=Lig3 PE=1 SV=2	Lig3	113.07	0.985	1.025	1.033	1.027	1.073	1	1.071	1.057	1.086
P13516	Acyl-CoA desaturase 1 OS=Mus musculus OX=10090 GN=Scd1 PE=1 SV=2	Scd1	41.046			1.153			0.961			0.817
Q6IE82	Protein Jade-3 OS=Mus musculus OX=10090 GN=Jade3 PE=1 SV=1	Jade3	93.454
Q8BVI5	Syntaxin-16 OS=Mus musculus OX=10090 GN=Stx16 PE=1 SV=3	Stx16	37.08	1.097	1.1		0.901	0.849		0.95	0.971
Q80Y86	Mitogen-activated protein kinase 15 OS=Mus musculus OX=10090 GN=Mapk15 PE=1 SV=1	Mapk15	60.678	1.044			1.082			0.985
Q80XN0	D-beta-hydroxybutyrate dehydrogenase, mitochondrial OS=Mus musculus OX=10090 GN=Bdh1 PE=1 SV=2	Bdh1	38.299	0.917	0.943	0.925	1.025	1.034	1.011	1.006	1.001	0.944
Q8VDI9	Alpha-1,2-mannosyltransferase ALG9 OS=Mus musculus OX=10090 GN=Alg9 PE=2 SV=1	Alg9	69.56	0.909	0.921	0.953	1.209	1.196	1.111	1.101	1.043	1.039
Q05921	2-5A-dependent ribonuclease OS=Mus musculus OX=10090 GN=Rnasel PE=1 SV=2	Rnasel	83.274	0.922	0.962	1.104	1.137	1.09	0.903	1.041	0.979	0.994
Q04887	Transcription factor SOX-9 OS=Mus musculus OX=10090 GN=Sox9 PE=1 SV=2	Sox9	56.076
Q6ZPJ0	Testis-expressed protein 2 OS=Mus musculus OX=10090 GN=Tex2 PE=1 SV=2	Tex2	125.22			0.939			0.991			1.276
Q80VP1	Epsin-1 OS=Mus musculus OX=10090 GN=Epn1 PE=1 SV=3	Epn1	60.211			1.042			0.924			1.236
P15066	Transcription factor jun-D OS=Mus musculus OX=10090 GN=Jund PE=1 SV=1	Jund	34.904		1.245	1.147		1.351	1.004		1.31	1.056
Q61085	Rhophilin-1 OS=Mus musculus OX=10090 GN=Rhpn1 PE=1 SV=2	Rhpn1	71.318			0.818			0.915			0.922
Q9WUV0	Origin recognition complex subunit 5 OS=Mus musculus OX=10090 GN=Orc5 PE=2 SV=1	Orc5	50.216	1.045	0.918	1.052	1.005	1.111	1.135	1.083	1.16	1.205
Q9DB27	Malignant T-cell-amplified sequence 1 OS=Mus musculus OX=10090 GN=Mcts1 PE=1 SV=1	Mcts1	20.555		0.994	1.009		0.911	0.96		0.817	0.723
Q3TIR1	Trafficking protein particle complex subunit 13 OS=Mus musculus OX=10090 GN=Trappc13 PE=2 SV=1	Trappc13	46.476	0.945			1.085			1.327
Q8CIS0	Caspase recruitment domain-containing protein 11 OS=Mus musculus OX=10090 GN=Card11 PE=1 SV=2	Card11	134.04	1.062	0.947		0.914	0.919		1.022	1.041
Q8BK67	Protein RCC2 OS=Mus musculus OX=10090 GN=Rcc2 PE=1 SV=1	Rcc2	55.983	1.004	0.984	1.032	0.912	0.909	0.968	0.954	0.904	0.938
Q9Z160	Conserved oligomeric Golgi complex subunit 1 OS=Mus musculus OX=10090 GN=Cog1 PE=1 SV=3	Cog1	109.05	1.016	0.997	0.996	1.051	1.159	1.061	1.099	0.955	1.022
Q8BFQ8	Glutamine amidotransferase-like class 1 domain-containing protein 1 OS=Mus musculus OX=10090 GN=Gatd1 PE=1 SV=1	Gatd1	23.277		1.041			0.962			0.959
Q91VK1	Basic leucine zipper and W2 domain-containing protein 2 OS=Mus musculus OX=10090 GN=Bzw2 PE=1 SV=1	Bzw2	48.063	1.023	0.997	1.023	0.905	0.991	0.917	0.927	0.973	0.975
Q9CSU0	Regulation of nuclear pre-mRNA domain-containing protein 1B OS=Mus musculus OX=10090 GN=Rprd1b PE=1 SV=2	Rprd1b	36.883	1.064	1.039	1.067	0.943	0.896	0.911	0.895	0.917	1.023
Q9DCG6	Phenazine biosynthesis-like domain-containing protein 1 OS=Mus musculus OX=10090 GN=Pbld1 PE=1 SV=2	Pbld1	32.047	0.855		0.97	0.896		1.083	0.821		0.971
Q9D1G5	Leucine-rich repeat-containing protein 57 OS=Mus musculus OX=10090 GN=Lrrc57 PE=1 SV=1	Lrrc57	26.76	1.04		0.992	0.935		0.977	1.027		0.963
P97449	Aminopeptidase N OS=Mus musculus OX=10090 GN=Anpep PE=1 SV=4	Anpep	109.65	0.905	0.894	0.866	0.94	0.985	0.929	0.913	0.954	0.97
P08003	Protein disulfide-isomerase A4 OS=Mus musculus OX=10090 GN=Pdia4 PE=1 SV=3	Pdia4	71.982	1.022	1.011	1.028	0.976	0.969	0.975	0.98	0.963	0.968
Q8BH15	CCR4-NOT transcription complex subunit 10 OS=Mus musculus OX=10090 GN=Cnot10 PE=1 SV=1	Cnot10	81.817	0.954	1.032	0.968	1.071	0.993	1.094	0.947	0.974	1.043
P30681	High mobility group protein B2 OS=Mus musculus OX=10090 GN=Hmgb2 PE=1 SV=3	Hmgb2	24.162	1.023	1.019	1.026	0.805	0.807	0.812	0.839	0.969	0.882
Q5RL79	Keratinocyte-associated protein 2 OS=Mus musculus OX=10090 GN=Krtcap2 PE=1 SV=2	Krtcap2	14.674	0.988	1.01	0.959	0.912	0.97	1.047	0.878	1.114	1.11
P18155	Bifunctional methylenetetrahydrofolate dehydrogenase/cyclohydrolase, mitochondrial OS=Mus musculus OX=10090 GN=Mthfd2 PE=1 SV=1	Mthfd2	37.863	1.169	1.132	1.164	0.99	1.042	1.037	1.054	1.051	1.024
P97927	Laminin subunit alpha-4 OS=Mus musculus OX=10090 GN=Lama4 PE=1 SV=2	Lama4	201.82
Q99J08	SEC14-like protein 2 OS=Mus musculus OX=10090 GN=Sec14l2 PE=1 SV=1	Sec14l2	46.3	0.818	0.632	0.644	0.868	0.648	0.686	1.001	0.998	0.967
Q9DB77	Cytochrome b-c1 complex subunit 2, mitochondrial OS=Mus musculus OX=10090 GN=Uqcrc2 PE=1 SV=1	Uqcrc2	48.234	0.912	0.946	0.918	1.086	1.124	1.118	0.991	1.025	1.017
Q9D1M7	Peptidyl-prolyl cis-trans isomerase FKBP11 OS=Mus musculus OX=10090 GN=Fkbp11 PE=1 SV=1	Fkbp11	22.137	1.051	1.032	1.068	1.088	1.055	0.981	1.009	0.968	1.141
Q60778	NF-kappa-B inhibitor beta OS=Mus musculus OX=10090 GN=Nfkbib PE=1 SV=2	Nfkbib	37.965		1.113	1.188		1.238	1.224		1.184	1.079
P97414	Potassium voltage-gated channel subfamily KQT member 1 OS=Mus musculus OX=10090 GN=Kcnq1 PE=1 SV=3	Kcnq1	74.513	0.907	0.841	0.781	0.838	0.779	0.848	0.991	0.98	0.944
Q6PFR5	Transformer-2 protein homolog alpha OS=Mus musculus OX=10090 GN=Tra2a PE=1 SV=1	Tra2a	32.316	1.025	1.01		1.235	0.994		1.081	1.021
Q99KK2	N-acylneuraminate cytidylyltransferase OS=Mus musculus OX=10090 GN=Cmas PE=1 SV=2	Cmas	48.057	0.947	0.925	0.932	0.997	1.089	1.033	0.889	0.943	1.073
P47226	Testin OS=Mus musculus OX=10090 GN=Tes PE=1 SV=1	Tes	47.983	1.053	1.006	1.025	1.055	1.088	1.031	1.018	0.93	1.098
A2AF47	Dedicator of cytokinesis protein 11 OS=Mus musculus OX=10090 GN=Dock11 PE=1 SV=1	Dock11	237.77	1.002	0.993		0.99	0.961		1.09	1.035
Q9WTP7	GTP:AMP phosphotransferase AK3, mitochondrial OS=Mus musculus OX=10090 GN=Ak3 PE=1 SV=3	Ak3	25.426	0.887	0.917	0.929	0.88	0.9	0.9	0.881	0.921	0.958
Q6PDX6	E3 ubiquitin-protein ligase Rnf220 OS=Mus musculus OX=10090 GN=Rnf220 PE=1 SV=1	Rnf220	62.693
Q9Z2Y3	Homer protein homolog 1 OS=Mus musculus OX=10090 GN=Homer1 PE=1 SV=2	Homer1	41.412	1.215	0.94	1.171	1.021	0.981	1.001	0.974	1.132	0.994
O70481	E3 ubiquitin-protein ligase UBR1 OS=Mus musculus OX=10090 GN=Ubr1 PE=1 SV=2	Ubr1	200.24	0.898			1.079			1.114
Q33DR3	Decaprenyl-diphosphate synthase subunit 2 OS=Mus musculus OX=10090 GN=Pdss2 PE=1 SV=2	Pdss2	43.98	1.009	0.738	0.981	0.914	1.012	1.032	1.167	1.549	0.956
P97772	Metabotropic glutamate receptor 1 OS=Mus musculus OX=10090 GN=Grm1 PE=1 SV=2	Grm1	133.21	1.073			1.113			1.098
P62488	DNA-directed RNA polymerase II subunit RPB7 OS=Mus musculus OX=10090 GN=Polr2g PE=1 SV=1	Polr2g	19.294	1.08	1.133		0.985	1.029		0.914	0.95
Q62087	Serum paraoxonase/lactonase 3 OS=Mus musculus OX=10090 GN=Pon3 PE=1 SV=2	Pon3	39.351	0.928	1.018	0.984	1.012	1.139	1.102	1.029	1.007	1.01
P61164	Alpha-centractin OS=Mus musculus OX=10090 GN=Actr1a PE=1 SV=1	Actr1a	42.613	1.012	1.027	0.975	0.981	0.997	0.955	0.908	0.923	0.897
O55071	Cytochrome P450 2B19 OS=Mus musculus OX=10090 GN=Cyp2b19 PE=2 SV=1	Cyp2b19	55.996	0.647	0.718	0.697	0.93	0.846	0.924	1.031	1.057	1.072
P23298	Protein kinase C eta type OS=Mus musculus OX=10090 GN=Prkch PE=1 SV=2	Prkch	77.918	0.895		0.949	1.013		1.003	0.894		0.944
P09528	Ferritin heavy chain OS=Mus musculus OX=10090 GN=Fth1 PE=1 SV=2	Fth1	21.066	0.941	0.969	0.964	0.755	0.791	0.781	0.834	0.876	0.862
Q9DC69	NADH dehydrogenase [ubiquinone] 1 alpha subcomplex subunit 9, mitochondrial OS=Mus musculus OX=10090 GN=Ndufa9 PE=1 SV=2	Ndufa9	42.525	0.904	0.9	0.931	1.116	1.102	1.023	1.038	0.947	1.029
Q99LC3	NADH dehydrogenase [ubiquinone] 1 alpha subcomplex subunit 10, mitochondrial OS=Mus musculus OX=10090 GN=Ndufa10 PE=1 SV=1	Ndufa10	40.603	0.924	0.915	0.925	1.058	1.034	1.027	0.993	1.013	1.001
Q80UY2	E3 ubiquitin-protein ligase KCMF1 OS=Mus musculus OX=10090 GN=Kcmf1 PE=1 SV=1	Kcmf1	41.791			0.907			0.907			1.121
Q5U430	E3 ubiquitin-protein ligase UBR3 OS=Mus musculus OX=10090 GN=Ubr3 PE=1 SV=3	Ubr3	212.75	0.976	1.019		1.025	0.982		1.107	0.898
Q99KW3	TRIO and F-actin-binding protein OS=Mus musculus OX=10090 GN=Triobp PE=1 SV=3	Triobp	223.37	0.671	0.826	0.981	0.877	0.892	1.002	1.582	1.474	0.986
Q99J39	Malonyl-CoA decarboxylase, mitochondrial OS=Mus musculus OX=10090 GN=Mlycd PE=1 SV=1	Mlycd	54.735		0.907			0.978			0.924
Q922K7	Probable 28S rRNA (cytosine-C(5))-methyltransferase OS=Mus musculus OX=10090 GN=Nop2 PE=1 SV=1	Nop2	86.751	1.053	1.075	1.121	1.122	1.08	1.083	1.085	1.087	1.111
Q9D379	Epoxide hydrolase 1 OS=Mus musculus OX=10090 GN=Ephx1 PE=1 SV=2	Ephx1	52.576	0.732	0.729	0.692	0.947	0.94	0.951	0.97	0.99	0.916
Q9CRA8	Exosome complex component RRP46 OS=Mus musculus OX=10090 GN=Exosc5 PE=1 SV=1	Exosc5	25.194			1.072			1.143			1.111
O08738	Caspase-6 OS=Mus musculus OX=10090 GN=Casp6 PE=1 SV=1	Casp6	31.595	0.809	0.796	0.829	0.796	0.772	0.865	0.77	0.707	0.794
Q9DAJ4	WD repeat domain-containing protein 83 OS=Mus musculus OX=10090 GN=Wdr83 PE=1 SV=1	Wdr83	34.443
P50516	V-type proton ATPase catalytic subunit A OS=Mus musculus OX=10090 GN=Atp6v1a PE=1 SV=2	Atp6v1a	68.325	0.997	0.952	0.985	1.086	1.025	0.999	1.059	1.194	1.064
Q9ERB0	Synaptosomal-associated protein 29 OS=Mus musculus OX=10090 GN=Snap29 PE=1 SV=1	Snap29	29.572	0.791	1.073	0.871	1.017	0.977	1.041	1.342	0.82	1.178
Q3UZ01	RNA-binding protein 40 OS=Mus musculus OX=10090 GN=Rnpc3 PE=2 SV=2	Rnpc3	57.971			0.968			1.001			1.087
P84104	Serine/arginine-rich splicing factor 3 OS=Mus musculus OX=10090 GN=Srsf3 PE=1 SV=1	Srsf3	19.329	0.965	0.969	0.978	1	1.071	0.998	1.035	1.093	1.106
P39098	Mannosyl-oligosaccharide 1,2-alpha-mannosidase IB OS=Mus musculus OX=10090 GN=Man1a2 PE=1 SV=1	Man1a2	72.871	1.078			1.132			1.124
Q8K1M6	Dynamin-1-like protein OS=Mus musculus OX=10090 GN=Dnm1l PE=1 SV=2	Dnm1l	82.657	0.963	0.958	0.975	1.072	1.011	0.961	0.955	0.94	1.003
Q8BH48	Ubiquitin-associated protein 1 OS=Mus musculus OX=10090 GN=Ubap1 PE=1 SV=1	Ubap1	55.028
P46412	Glutathione peroxidase 3 OS=Mus musculus OX=10090 GN=Gpx3 PE=1 SV=2	Gpx3	25.424		1.178	1.165		1.614	1.89		1.806	1.915
Q8K114	Integrator complex subunit 9 OS=Mus musculus OX=10090 GN=Ints9 PE=1 SV=1	Ints9	74.077		1.026	1.035		0.841	0.931		0.969	0.962
Q80ZK0	28S ribosomal protein S10, mitochondrial OS=Mus musculus OX=10090 GN=Mrps10 PE=1 SV=1	Mrps10	18.698	0.963	1.009	0.929	1.102	1.024	1.047	1.012	1.008	1.049
Q76LS9	Ubiquitin carboxyl-terminal hydrolase MINDY-1 OS=Mus musculus OX=10090 GN=Mindy1 PE=1 SV=1	Mindy1	51.225	1.092		1.215	1.124		1.287	1.03		1.175
Q920Q8	Influenza virus NS1A-binding protein homolog OS=Mus musculus OX=10090 GN=Ivns1abp PE=1 SV=2	Ivns1abp	71.58	0.944	1.027	1.006	0.979	0.981	1.048	0.911	0.962	0.943
Q8BRH0	Transmembrane and TPR repeat-containing protein 3 OS=Mus musculus OX=10090 GN=Tmtc3 PE=1 SV=2	Tmtc3	104.2		1.073			1.046			1.102
Q8BJU0	Small glutamine-rich tetratricopeptide repeat-containing protein alpha OS=Mus musculus OX=10090 GN=Sgta PE=1 SV=2	Sgta	34.322	1.083	0.967	0.993	1.113	0.999	0.994	1.001	1.019	1.073
P13405	Retinoblastoma-associated protein OS=Mus musculus OX=10090 GN=Rb1 PE=1 SV=2	Rb1	105.37
O70404	Vesicle-associated membrane protein 8 OS=Mus musculus OX=10090 GN=Vamp8 PE=1 SV=1	Vamp8	11.451	1.08	1.048	1.059	1.018	1.028	0.999	1.02	1.046	1.074
Q9D0I8	mRNA turnover protein 4 homolog OS=Mus musculus OX=10090 GN=Mrto4 PE=1 SV=1	Mrto4	27.545	1.117	1.072	1.121	1.033	1.05	0.979	1.158	1.109	1.085
Q61183	Poly(A) polymerase alpha OS=Mus musculus OX=10090 GN=Papola PE=1 SV=4	Papola	82.308	0.981	1.023	0.974	0.92	0.923	0.925	0.892	0.873	0.965
Q9QWI6	SRC kinase signaling inhibitor 1 OS=Mus musculus OX=10090 GN=Srcin1 PE=1 SV=2	Srcin1	134.86			1.537			2.08			1.842
A2A6A1	G patch domain-containing protein 8 OS=Mus musculus OX=10090 GN=Gpatch8 PE=1 SV=1	Gpatch8	164.99	0.93	1.048	0.957	1.03	1.088	1.017	1.381	1.149	1.337
C0HKE9	Histone H2A type 1-P OS=Mus musculus OX=10090 GN=Hist1h2ap PE=1 SV=1	Hist1h2ap	14.135		0.446	0.756		0.664	0.675		1.812	1.188
Q8BJA3	Homeobox-containing protein 1 OS=Mus musculus OX=10090 GN=Hmbox1 PE=1 SV=1	Hmbox1	47.115		0.966			0.901			0.995
Q8K370	Acyl-CoA dehydrogenase family member 10 OS=Mus musculus OX=10090 GN=Acad10 PE=1 SV=1	Acad10	118.98	1.012	0.917	0.97	0.932	0.964	0.95	1.061	0.947	0.939
Q8C8T8	Pre-rRNA-processing protein TSR2 homolog OS=Mus musculus OX=10090 GN=Tsr2 PE=1 SV=1	Tsr2	20.891			1.063			0.902			1.01
A2BDX3	Adenylyltransferase and sulfurtransferase MOCS3 OS=Mus musculus OX=10090 GN=Mocs3 PE=1 SV=1	Mocs3	49.374	1.106	0.982	1.058	1.123	1.057	0.963	1.16	1.066	1.091
B1AY13	Ubiquitin carboxyl-terminal hydrolase 24 OS=Mus musculus OX=10090 GN=Usp24 PE=1 SV=1	Usp24	294	0.972	1.075	1.02	1.054	1.052	1.087	1.102	1.096	0.995
Q9R1C7	Pre-mRNA-processing factor 40 homolog A OS=Mus musculus OX=10090 GN=Prpf40a PE=1 SV=1	Prpf40a	108.48	1.035	1.02	0.991	1.119	1.046	1.079	1.007	0.964	1.022
Q6ZPE2	Myotubularin-related protein 5 OS=Mus musculus OX=10090 GN=Sbf1 PE=1 SV=2	Sbf1	208.69
P16045	Galectin-1 OS=Mus musculus OX=10090 GN=Lgals1 PE=1 SV=3	Lgals1	14.866	1.102	1.192	1.076	1.399	1.384	1.255	1.415	1.365	1.275
Q7TPV4	Myb-binding protein 1A OS=Mus musculus OX=10090 GN=Mybbp1a PE=1 SV=2	Mybbp1a	152.04	1.046	1.02	1.06	1.067	1.101	1.059	1.083	1.069	1.083
P70700	DNA-directed RNA polymerase I subunit RPA2 OS=Mus musculus OX=10090 GN=Polr1b PE=1 SV=2	Polr1b	128.21	1.083	1.103	1.213	1.155	1.033	1.274	1.137	1.138	1.094
Q8C854	Myelin expression factor 2 OS=Mus musculus OX=10090 GN=Myef2 PE=1 SV=1	Myef2	63.294	1.067	1.095	1.082	1.042	1.058	1.115	1.035	1.018	1.144
Q9CZD5	Translation initiation factor IF-3, mitochondrial OS=Mus musculus OX=10090 GN=Mtif3 PE=1 SV=1	Mtif3	31.739			1			0.876			1.055
Q9D727	Uncharacterized protein C6orf226 homolog OS=Mus musculus OX=10090 PE=1 SV=1	---	12.013	1.234		1.23	0.932		0.949	1.084		1.111
Q80VI1	E3 ubiquitin-protein ligase TRIM56 OS=Mus musculus OX=10090 GN=Trim56 PE=1 SV=1	Trim56	79.512		0.935			0.983			0.89
Q8CJ69	BMP-binding endothelial regulator protein OS=Mus musculus OX=10090 GN=Bmper PE=1 SV=1	Bmper	76.147
P06745	Glucose-6-phosphate isomerase OS=Mus musculus OX=10090 GN=Gpi PE=1 SV=4	Gpi	62.766	0.897	0.953	0.927	0.686	0.753	0.693	0.699	0.774	0.704
Q61249	Immunoglobulin-binding protein 1 OS=Mus musculus OX=10090 GN=Igbp1 PE=1 SV=1	Igbp1	38.97	1.044	1.059	1.062	0.998	0.924	1.055	1.104	1.006	0.981
P23607	Zinc finger autosomal protein OS=Mus musculus OX=10090 GN=Zfa PE=3 SV=1	Zfa	84.657		0.833	0.91		0.963	0.836		1.228	1.096
Q9JHC9	ETS-related transcription factor Elf-2 OS=Mus musculus OX=10090 GN=Elf2 PE=1 SV=1	Elf2	63.202
Q9D898	Actin-related protein 2/3 complex subunit 5-like protein OS=Mus musculus OX=10090 GN=Arpc5l PE=1 SV=1	Arpc5l	16.98	1.014	1.04	1.051	0.962	1.065	0.995	0.962	0.996	0.993
P21956	Lactadherin OS=Mus musculus OX=10090 GN=Mfge8 PE=1 SV=3	Mfge8	51.24	0.97	0.942	1.059	1.118	1.182	1.082	1.204	1.021	1.191
P10605	Cathepsin B OS=Mus musculus OX=10090 GN=Ctsb PE=1 SV=2	Ctsb	37.279	0.965	0.911	0.958	0.876	0.904	0.936	0.949	0.968	1.037
Q8CCF0	U4/U6 small nuclear ribonucleoprotein Prp31 OS=Mus musculus OX=10090 GN=Prpf31 PE=1 SV=3	Prpf31	55.429	1.026	1.033	1.024	1.026	0.893	0.939	0.979	0.974	1.009
Q8CI61	BAG family molecular chaperone regulator 4 OS=Mus musculus OX=10090 GN=Bag4 PE=1 SV=2	Bag4	49.094		1.085	1.09		0.853	0.963		0.996	1.177
Q8VBW6	NEDD8-activating enzyme E1 regulatory subunit OS=Mus musculus OX=10090 GN=Nae1 PE=1 SV=1	Nae1	60.273	1.04	0.864		0.887	1.263		0.906	1.314
Q3U0V2	Tumor necrosis factor receptor type 1-associated DEATH domain protein OS=Mus musculus OX=10090 GN=Tradd PE=1 SV=1	Tradd	34.577	0.955			1.303			1.237
Q5SXJ3	Fanconi anemia group J protein homolog OS=Mus musculus OX=10090 GN=Brip1 PE=2 SV=1	Brip1	131.36
O35343	Importin subunit alpha-3 OS=Mus musculus OX=10090 GN=Kpna4 PE=1 SV=1	Kpna4	57.922	1.219		0.988	0.776		0.95	1.206		1.017
Q80W21	Glutathione S-transferase Mu 7 OS=Mus musculus OX=10090 GN=Gstm7 PE=1 SV=1	Gstm7	25.709		0.799			0.722			0.769
Q8VHZ7	U3 small nucleolar ribonucleoprotein protein IMP4 OS=Mus musculus OX=10090 GN=Imp4 PE=2 SV=1	Imp4	33.656	1.096	1.079	1.077	0.964	1.046	1.07	0.998	1.008	0.993
Q9Z0S9	Prenylated Rab acceptor protein 1 OS=Mus musculus OX=10090 GN=Rabac1 PE=1 SV=1	Rabac1	20.619		1.021	1.041		1.074	1.124		1.066	1.028
Q8VCG3	WD repeat-containing protein 74 OS=Mus musculus OX=10090 GN=Wdr74 PE=2 SV=1	Wdr74	42.636	1.043	1.064	1.014	1.107	1.139	1.051	1.043	1.038	1.152
Q9CXY6	Interleukin enhancer-binding factor 2 OS=Mus musculus OX=10090 GN=Ilf2 PE=1 SV=1	Ilf2	43.062	1.116	1.095	1.081	0.776	0.874	0.835	0.851	0.887	0.86
Q9Z247	Peptidyl-prolyl cis-trans isomerase FKBP9 OS=Mus musculus OX=10090 GN=Fkbp9 PE=1 SV=1	Fkbp9	62.995		1.144	1.119		1.866	1.276		1.492	1.615
Q9CQF9	Prenylcysteine oxidase OS=Mus musculus OX=10090 GN=Pcyox1 PE=1 SV=1	Pcyox1	56.494	0.963	0.951	1.013	1.189	1.021	1.168	1.112	0.97	1
P58252	Elongation factor 2 OS=Mus musculus OX=10090 GN=Eef2 PE=1 SV=2	Eef2	95.313	1.068	1.049	1.055	0.981	0.982	0.977	0.957	1.001	0.967
Q9D394	Protein RUFY3 OS=Mus musculus OX=10090 GN=Rufy3 PE=1 SV=1	Rufy3	53.006		1.31			1.87			2.011
Q8R0Z5	Mitoferrin-2 OS=Mus musculus OX=10090 GN=Slc25a28 PE=2 SV=1	Slc25a28	39.357		1.058			1.028			1.083
Q8K1J5	Replication stress response regulator SDE2 OS=Mus musculus OX=10090 GN=Sde2 PE=1 SV=1	Sde2	48.58	1.128	1.099	1.037	1.008	0.93	1	1.099	0.988	0.937
A4Q9F1	Protein monoglycylase TTLL8 OS=Mus musculus OX=10090 GN=Ttll8 PE=1 SV=1	Ttll8	94.914	0.993	1.105	0.983	0.657	0.703	0.644	0.599	0.639	0.58
Q8K4K6	Pantothenate kinase 1 OS=Mus musculus OX=10090 GN=Pank1 PE=1 SV=1	Pank1	60.091
Q9DCM2	Glutathione S-transferase kappa 1 OS=Mus musculus OX=10090 GN=Gstk1 PE=1 SV=3	Gstk1	25.704	0.779		0.85	0.916		0.984	1.014		0.986
P62751	60S ribosomal protein L23a OS=Mus musculus OX=10090 GN=Rpl23a PE=1 SV=1	Rpl23a	17.695	1.069	1.053	1.042	0.984	0.996	0.974	0.972	0.973	0.97
A2ARI4	Leucine-rich repeat-containing G-protein coupled receptor 4 OS=Mus musculus OX=10090 GN=Lgr4 PE=1 SV=1	Lgr4	104.15
Q91YJ2	Sorting nexin-4 OS=Mus musculus OX=10090 GN=Snx4 PE=1 SV=1	Snx4	51.777	1.033	0.999	0.951	0.979	0.989	0.97	1.082	0.984	1.006
O70338	Ribonuclease H1 OS=Mus musculus OX=10090 GN=Rnaseh1 PE=2 SV=1	Rnaseh1	31.805
P16627	Heat shock 70 kDa protein 1-like OS=Mus musculus OX=10090 GN=Hspa1l PE=1 SV=4	Hspa1l	70.636
A2AR02	Peptidyl-prolyl cis-trans isomerase G OS=Mus musculus OX=10090 GN=Ppig PE=1 SV=1	Ppig	88.324	1.009	1.013	1.005	1.237	1.171	1.054	1.164	1.114	1.156
Q9DBD5	Proline-, glutamic acid- and leucine-rich protein 1 OS=Mus musculus OX=10090 GN=Pelp1 PE=1 SV=2	Pelp1	118.07	1.011	1.021	1.003	1.135	1.15	1.138	1.099	1.158	1.181
Q9ES64	Harmonin OS=Mus musculus OX=10090 GN=Ush1c PE=1 SV=1	Ush1c	102.28	0.879	0.928	0.922	0.958	0.842	0.882	1.069	0.991	0.906
Q9QYT7	Phosphatidylinositol N-acetylglucosaminyltransferase subunit Q OS=Mus musculus OX=10090 GN=Pigq PE=1 SV=3	Pigq	66.264
P59325	Eukaryotic translation initiation factor 5 OS=Mus musculus OX=10090 GN=Eif5 PE=1 SV=1	Eif5	48.968	1.106	1.083	1.037	0.922	0.959	0.937	0.924	0.952	0.959
Q5U4D9	THO complex subunit 6 homolog OS=Mus musculus OX=10090 GN=Thoc6 PE=1 SV=1	Thoc6	37.314	0.963	1.007	1.054	1	1.076	1.118	0.974	0.932	1.175
Q6KCD5	Nipped-B-like protein OS=Mus musculus OX=10090 GN=Nipbl PE=1 SV=1	Nipbl	315.45	0.936	0.846	0.977	1.015	0.818	0.982	1.034	1.221	1.107
Q78PY7	Staphylococcal nuclease domain-containing protein 1 OS=Mus musculus OX=10090 GN=Snd1 PE=1 SV=1	Snd1	102.09	0.992	1.03	1.041	0.946	0.967	0.997	1.028	1.035	0.976
Q8BJU9	Peptide chain release factor 1-like, mitochondrial OS=Mus musculus OX=10090 GN=Mtrf1l PE=2 SV=1	Mtrf1l	42.248	1.044		0.99	0.932		0.985	1.19		1.038
Q00493	Carboxypeptidase E OS=Mus musculus OX=10090 GN=Cpe PE=1 SV=2	Cpe	53.255		0.989	0.993		0.871	0.987		0.872	1.106
Q9CPY7	Cytosol aminopeptidase OS=Mus musculus OX=10090 GN=Lap3 PE=1 SV=3	Lap3	56.141	0.942	0.968	0.952	0.893	0.899	0.865	0.923	0.903	0.871
Q7TSC1	Protein PRRC2A OS=Mus musculus OX=10090 GN=Prrc2a PE=1 SV=1	Prrc2a	229.2	1.146	1.016	1.007	0.915	0.96	0.92	1.186	1.086	0.985
Q61207	Prosaposin OS=Mus musculus OX=10090 GN=Psap PE=1 SV=2	Psap	61.422	1.005	1.051	1.079	0.951	0.982	1.029	1.092	1.078	1.136
Q61792	LIM and SH3 domain protein 1 OS=Mus musculus OX=10090 GN=Lasp1 PE=1 SV=1	Lasp1	29.994	0.946	0.966	0.991	0.818	0.834	0.833	0.911	0.799	0.883
Q78WZ7	DNA-directed RNA polymerase I subunit RPA43 OS=Mus musculus OX=10090 GN=Twistnb PE=1 SV=1	Twistnb	36.721	1.072	1.084		1.223	1.034		1.175	1.104
Q9DBU5	E3 ubiquitin-protein ligase RNF6 OS=Mus musculus OX=10090 GN=Rnf6 PE=1 SV=1	Rnf6	74.091		0.865			0.985			0.826
Q9ESC8	AF4/FMR2 family member 4 OS=Mus musculus OX=10090 GN=Aff4 PE=1 SV=1	Aff4	126.64
P67778	Prohibitin OS=Mus musculus OX=10090 GN=Phb PE=1 SV=1	Phb	29.82	0.914	0.935	0.919	1.089	1.121	1.071	1.033	1.008	0.986
Q8BT60	Copine-3 OS=Mus musculus OX=10090 GN=Cpne3 PE=1 SV=2	Cpne3	59.584	0.97	0.945	0.944	1.036	1.123	1.112	1.023	0.98	0.995
Q8BZX4	Splicing regulatory glutamine/lysine-rich protein 1 OS=Mus musculus OX=10090 GN=Srek1 PE=2 SV=1	Srek1	56.763	1.103	1.05		1.022	0.912		0.95	1.012
Q5NCR9	Nuclear speckle splicing regulatory protein 1 OS=Mus musculus OX=10090 GN=Nsrp1 PE=1 SV=1	Nsrp1	63.798			1.138			0.964			1.015
Q8BP48	Methionine aminopeptidase 1 OS=Mus musculus OX=10090 GN=Metap1 PE=1 SV=1	Metap1	43.221	1.039	1.016	1.027	1.03	1.025	0.966	0.965	1.021	1.014
Q61474	RNA-binding protein Musashi homolog 1 OS=Mus musculus OX=10090 GN=Msi1 PE=1 SV=1	Msi1	39.119		0.841	0.845		0.834	0.818		0.851	0.788
Q9JM93	ADP-ribosylation factor-like protein 6-interacting protein 4 OS=Mus musculus OX=10090 GN=Arl6ip4 PE=1 SV=1	Arl6ip4	25.524	0.997			0.833			0.96
Q8R3H9	Tetratricopeptide repeat protein 4 OS=Mus musculus OX=10090 GN=Ttc4 PE=1 SV=1	Ttc4	44.338		0.997	1.004		1.04	1.015		1.001	1.075
Q99MV1	Tudor domain-containing protein 1 OS=Mus musculus OX=10090 GN=Tdrd1 PE=1 SV=2	Tdrd1	129.69	1.091	1.079	1.095	1.364	1.315	1.474	1.196	1.18	1.216
Q9CZX5	PIN2/TERF1-interacting telomerase inhibitor 1 OS=Mus musculus OX=10090 GN=Pinx1 PE=1 SV=2	Pinx1	37.22	1.15	1.081	1.136	1.098	1.061	1.114	1.113	1.115	1.133
Q61166	Microtubule-associated protein RP/EB family member 1 OS=Mus musculus OX=10090 GN=Mapre1 PE=1 SV=3	Mapre1	30.016	1.072	1.099	1.094	0.893	0.922	0.901	0.977	0.949	0.975
O88508	DNA (cytosine-5)-methyltransferase 3A OS=Mus musculus OX=10090 GN=Dnmt3a PE=1 SV=2	Dnmt3a	101.67	0.97	1.052	1.064	1.174	0.963	1.062	1.042	1.069	0.987
Q9CPQ5	Centromere protein Q OS=Mus musculus OX=10090 GN=Cenpq PE=2 SV=2	Cenpq	30.501
P51658	Estradiol 17-beta-dehydrogenase 2 OS=Mus musculus OX=10090 GN=Hsd17b2 PE=1 SV=2	Hsd17b2	41.835		0.949			1.252			1.103
Q6NSQ7	Protein LTV1 homolog OS=Mus musculus OX=10090 GN=Ltv1 PE=1 SV=2	Ltv1	54.022	1.104	1.01	1.06	1.042	1.16	1.012	1.187	1.172	1.079
Q8C6B2	Rhotekin OS=Mus musculus OX=10090 GN=Rtkn PE=1 SV=3	Rtkn	63.012		1.036			1.125			1.104
P59114	Phosphorylated CTD-interacting factor 1 OS=Mus musculus OX=10090 GN=Pcif1 PE=1 SV=1	Pcif1	80.504
Q9CYW4	Haloacid dehalogenase-like hydrolase domain-containing protein 3 OS=Mus musculus OX=10090 GN=Hdhd3 PE=1 SV=1	Hdhd3	28.027	0.839	0.837	0.798	0.763	0.752	0.82	0.84	0.886	0.785
P14211	Calreticulin OS=Mus musculus OX=10090 GN=Calr PE=1 SV=1	Calr	47.994	0.984	0.991	0.965	1.003	0.987	1.004	1	0.998	0.963
Q80YN3	Breast carcinoma-amplified sequence 1 homolog OS=Mus musculus OX=10090 GN=Bcas1 PE=1 SV=3	Bcas1	67.377		0.966			0.707			1.036
G5E870	E3 ubiquitin-protein ligase TRIP12 OS=Mus musculus OX=10090 GN=Trip12 PE=1 SV=1	Trip12	224.13	1.013	1.078	1.014	1.055	1.15	1.128	1.039	0.967	0.993
Q9D3D9	ATP synthase subunit delta, mitochondrial OS=Mus musculus OX=10090 GN=Atp5f1d PE=1 SV=1	Atp5f1d	17.6	0.914	0.884	0.863	0.973	0.912	0.934	0.977	0.971	0.95
Q6P2B1	Transportin-3 OS=Mus musculus OX=10090 GN=Tnpo3 PE=1 SV=1	Tnpo3	104.17	1.003	0.964	0.988	0.959	1.014	1.001	0.995	1.065	1.021
Q7TSS2	Ubiquitin-conjugating enzyme E2 Q1 OS=Mus musculus OX=10090 GN=Ube2q1 PE=1 SV=2	Ube2q1	46.172		0.959			1.008			0.944
Q9JJA7	Cyclin-L2 OS=Mus musculus OX=10090 GN=Ccnl2 PE=1 SV=1	Ccnl2	58.005	0.97	1.06		1.096	0.959		1.057	1.054
Q9WVR4	Fragile X mental retardation syndrome-related protein 2 OS=Mus musculus OX=10090 GN=Fxr2 PE=1 SV=1	Fxr2	73.742	1.038	1.076	1.186	1.028	1.05	1.229	1.181	1.16	1.343
Q91W39	Nuclear receptor coactivator 5 OS=Mus musculus OX=10090 GN=Ncoa5 PE=1 SV=1	Ncoa5	65.318	1.093	1.005	0.984	1.017	0.987	1.12	1.212	1.077	1.167
P40240	CD9 antigen OS=Mus musculus OX=10090 GN=Cd9 PE=1 SV=2	Cd9	25.258	1.09	1.041		1.172	1.257		1.079	1.029
P55050	Fatty acid-binding protein, intestinal OS=Mus musculus OX=10090 GN=Fabp2 PE=1 SV=2	Fabp2	15.126	0.686	0.705	0.652	0.515	0.528	0.484	0.51	0.587	0.572
Q62172	RalA-binding protein 1 OS=Mus musculus OX=10090 GN=Ralbp1 PE=1 SV=4	Ralbp1	75.042	1.009			0.875			1.321
Q9QUJ7	Long-chain-fatty-acid--CoA ligase 4 OS=Mus musculus OX=10090 GN=Acsl4 PE=1 SV=2	Acsl4	79.076	1.069	1.07	0.997	1.069	1.067	1.044	1.071	0.98	0.974
O89013	Leptin receptor gene-related protein OS=Mus musculus OX=10090 GN=Leprot PE=1 SV=1	Leprot	14.316
Q3TLP5	Enoyl-CoA hydratase domain-containing protein 2, mitochondrial OS=Mus musculus OX=10090 GN=Echdc2 PE=1 SV=2	Echdc2	31.852			0.93			1			1.121
P97742	Carnitine O-palmitoyltransferase 1, liver isoform OS=Mus musculus OX=10090 GN=Cpt1a PE=1 SV=4	Cpt1a	88.25	0.957	0.945	0.957	1.106	1.143	1.149	1.027	1.091	0.967
Q64430	Copper-transporting ATPase 1 OS=Mus musculus OX=10090 GN=Atp7a PE=1 SV=3	Atp7a	161.96
Q6PAC3	DDB1- and CUL4-associated factor 13 OS=Mus musculus OX=10090 GN=Dcaf13 PE=2 SV=2	Dcaf13	51.456	1.034	1.032	1.016	1.106	1.1	1.128	1.085	1.063	1.089
Q9CYD3	Cartilage-associated protein OS=Mus musculus OX=10090 GN=Crtap PE=1 SV=3	Crtap	46.169		0.827			1.181			1.263
Q62093	Serine/arginine-rich splicing factor 2 OS=Mus musculus OX=10090 GN=Srsf2 PE=1 SV=4	Srsf2	25.476	0.924	0.843	0.957	1.279	1.172	1.088	1.146	1.15	1.052
P62960	Nuclease-sensitive element-binding protein 1 OS=Mus musculus OX=10090 GN=Ybx1 PE=1 SV=3	Ybx1	35.73	1.175	1.12	1.123	0.929	0.954	0.973	1.001	1.101	1.123
Q9DB28	Ribonuclease P/MRP protein subunit POP5 OS=Mus musculus OX=10090 GN=Pop5 PE=1 SV=1	Pop5	19.285
P58929	Glucocorticoid modulatory element-binding protein 2 OS=Mus musculus OX=10090 GN=Gmeb2 PE=2 SV=2	Gmeb2	56.631			0.888			1.057			1.096
Q9CQI6	Coactosin-like protein OS=Mus musculus OX=10090 GN=Cotl1 PE=1 SV=3	Cotl1	15.944	0.935	0.992	0.975	0.808	0.869	0.792	0.808	0.854	0.842
P28843	Dipeptidyl peptidase 4 OS=Mus musculus OX=10090 GN=Dpp4 PE=1 SV=3	Dpp4	87.436	0.867	0.898	0.885	1.005	0.995	1.014	1.045	1.011	1.122
Q8CDM8	Protein FAM160B1 OS=Mus musculus OX=10090 GN=Fam160b1 PE=1 SV=2	Fam160b1	86.016	1.037			1.002			1.061
Q99NB9	Splicing factor 3B subunit 1 OS=Mus musculus OX=10090 GN=Sf3b1 PE=1 SV=1	Sf3b1	145.81	0.998	1.028	1.023	0.98	0.98	1.016	1.015	1.043	0.984
Q8BJ71	Nuclear pore complex protein Nup93 OS=Mus musculus OX=10090 GN=Nup93 PE=1 SV=1	Nup93	93.28	1.029	1.017	1.021	1.108	1.08	1.063	1.024	1.067	1.088
P46735	Unconventional myosin-Ib OS=Mus musculus OX=10090 GN=Myo1b PE=1 SV=3	Myo1b	128.56	0.984	0.988	1.039	1.055	1.019	1.076	1.047	1.05	0.967
Q7TST0	Butyrophilin-like protein 1 OS=Mus musculus OX=10090 GN=Btnl1 PE=2 SV=3	Btnl1	57.725	0.893	0.846	0.8	0.756	0.969	0.871	1.011	1.006	0.832
Q9EPC5	Retinoid-binding protein 7 OS=Mus musculus OX=10090 GN=Rbp7 PE=1 SV=1	Rbp7	15.427		0.974			0.915			0.886
Q04750	DNA topoisomerase 1 OS=Mus musculus OX=10090 GN=Top1 PE=1 SV=2	Top1	90.875	1.022	1.034	1.057	1.044	1.045	1.073	0.976	0.945	0.985
Q6RI63	Constitutive coactivator of peroxisome proliferator-activated receptor gamma OS=Mus musculus OX=10090 GN=Fam120b PE=1 SV=1	Fam120b	89.312
Q8VFV4	Olfactory receptor 1440 OS=Mus musculus OX=10090 GN=Olfr1440 PE=2 SV=1	Olfr1440	34.942
P13707	Glycerol-3-phosphate dehydrogenase [NAD(+)], cytoplasmic OS=Mus musculus OX=10090 GN=Gpd1 PE=1 SV=3	Gpd1	37.572	0.781	0.771	0.77	0.751	0.705	0.739	0.765	0.757	0.764
Q9R1C0	Transcription initiation factor TFIID subunit 7 OS=Mus musculus OX=10090 GN=Taf7 PE=1 SV=1	Taf7	39.125	1.007	1.078	1.16	0.88	0.812	0.807	0.943	0.975	0.914
Q91WG2	Rab GTPase-binding effector protein 2 OS=Mus musculus OX=10090 GN=Rabep2 PE=1 SV=3	Rabep2	62.132	0.99	1.068	1.471	0.881	1.002	0.942	0.938	0.936	1.088
Q9DB98	Leukocyte receptor cluster member 1 homolog OS=Mus musculus OX=10090 GN=Leng1 PE=2 SV=1	Leng1	30.469			1.12			0.832			0.859
Q9JII5	DAZ-associated protein 1 OS=Mus musculus OX=10090 GN=Dazap1 PE=1 SV=2	Dazap1	43.214	1.044	1.025	1.064	0.943	0.984	0.978	0.969	1.01	0.887
Q9CWH5	tRNA (guanine(10)-N2)-methyltransferase homolog OS=Mus musculus OX=10090 GN=Trmt11 PE=1 SV=1	Trmt11	52.904
P29037	TATA-box-binding protein OS=Mus musculus OX=10090 GN=Tbp PE=1 SV=1	Tbp	34.709
Q8R1U2	Cell growth regulator with EF hand domain protein 1 OS=Mus musculus OX=10090 GN=Cgref1 PE=1 SV=1	Cgref1	30.847	1.033			1.003			1.032
Q99N92	39S ribosomal protein L27, mitochondrial OS=Mus musculus OX=10090 GN=Mrpl27 PE=1 SV=1	Mrpl27	15.944	0.956	0.956	0.91	1.06	1.066	1.071	1.049	1.041	1.015
P52875	Transmembrane protein 165 OS=Mus musculus OX=10090 GN=Tmem165 PE=1 SV=2	Tmem165	34.79	0.921	1.051	1.034	1.01	1.238	1.305	1.002	1.067	1.056
Q8BWQ6	UPF0505 protein C16orf62 homolog OS=Mus musculus OX=10090 PE=1 SV=2	---	109.08	0.972	0.96	0.994	0.95	0.996	1.033	0.992	0.972	0.947
Q9QXS8	Probable N-acetyltransferase CML5 OS=Mus musculus OX=10090 GN=Cml5 PE=2 SV=2	Cml5	25.735		0.913			1.116			1.017
O88329	Unconventional myosin-Ia OS=Mus musculus OX=10090 GN=Myo1a PE=2 SV=2	Myo1a	118.69	0.881	0.892	0.917	1.003	0.988	0.973	0.933	0.966	0.936
O55137	Acyl-coenzyme A thioesterase 1 OS=Mus musculus OX=10090 GN=Acot1 PE=1 SV=1	Acot1	46.135	0.979	0.943	0.929	0.902	0.844	0.851	1.049	0.885	0.903
Q9D1M0	Protein SEC13 homolog OS=Mus musculus OX=10090 GN=Sec13 PE=1 SV=3	Sec13	35.565	0.985	0.986	0.969	1.048	1.024	1.02	1.056	1.041	0.999
Q62511	E3 ubiquitin-protein ligase ZFP91 OS=Mus musculus OX=10090 GN=Zfp91 PE=1 SV=3	Zfp91	63.388	1.026	0.927	0.835	0.879	1.021	0.84	1.29	1.143	1.089
Q8R2M0	Transcription elongation factor A N-terminal and central domain-containing protein 2 OS=Mus musculus OX=10090 GN=Tceanc2 PE=2 SV=2	Tceanc2	24.2	1.046	0.995		1.01	0.957		0.991	1.011
P07214	SPARC OS=Mus musculus OX=10090 GN=Sparc PE=1 SV=1	Sparc	34.45	1.278	1.375	1.255	1.61	1.903	1.521	1.701	1.796	1.596
O88643	Serine/threonine-protein kinase PAK 1 OS=Mus musculus OX=10090 GN=Pak1 PE=1 SV=1	Pak1	60.736	1.083	1.021	0.986	1.05	0.91	0.777	1.038	0.802	0.872
Q91WE4	UPF0729 protein C18orf32 homolog OS=Mus musculus OX=10090 PE=3 SV=1	---	8.0355		0.849	0.67		1.128	1.127		1.48	1.943
Q3UQA7	Selenoprotein H OS=Mus musculus OX=10090 GN=Selenoh PE=1 SV=2	Selenoh	12.974	1.059	0.996	1.119	1.123	0.842	0.798	1.113	0.829	0.789
Q61838	Pregnancy zone protein OS=Mus musculus OX=10090 GN=Pzp PE=1 SV=3	Pzp	165.85	1.233			1.276			1.494
Q8BQZ5	Cleavage and polyadenylation specificity factor subunit 4 OS=Mus musculus OX=10090 GN=Cpsf4 PE=2 SV=1	Cpsf4	23.653		1.039			1.085			1.069
Q9WTP6	Adenylate kinase 2, mitochondrial OS=Mus musculus OX=10090 GN=Ak2 PE=1 SV=5	Ak2	26.468	0.965	0.982	0.986	0.933	0.893	0.915	0.935	0.912	0.918
P26443	Glutamate dehydrogenase 1, mitochondrial OS=Mus musculus OX=10090 GN=Glud1 PE=1 SV=1	Glud1	61.336	0.948	0.926	0.956	0.99	0.967	1.02	1.103	1.104	1.091
Q8BMQ2	General transcription factor 3C polypeptide 4 OS=Mus musculus OX=10090 GN=Gtf3c4 PE=1 SV=2	Gtf3c4	91.612	0.964	1.066	1.117	1.143	1.048	1.023	0.993	0.993	1.07
Q99M87	DnaJ homolog subfamily A member 3, mitochondrial OS=Mus musculus OX=10090 GN=Dnaja3 PE=1 SV=1	Dnaja3	52.443	1	0.991	1.04	1.054	1.12	1.085	1	1.051	1.175
Q91V81	RNA-binding protein 42 OS=Mus musculus OX=10090 GN=Rbm42 PE=1 SV=1	Rbm42	49.875	1.033	1.045		0.874	0.946		0.938	1.111
A2AKG8	Focadhesin OS=Mus musculus OX=10090 GN=Focad PE=1 SV=1	Focad	198.95	1.124	1.017	1.008	0.752	1.09	0.992	1.188	1.068	0.961
Q8C165	N-fatty-acyl-amino acid synthase/hydrolase PM20D1 OS=Mus musculus OX=10090 GN=Pm20d1 PE=1 SV=1	Pm20d1	55.662		0.963			1.294			1.48
Q9D8Y0	EF-hand domain-containing protein D2 OS=Mus musculus OX=10090 GN=Efhd2 PE=1 SV=1	Efhd2	26.791	0.981	1.013	1.038	0.939	0.905	0.906	0.958	0.95	0.893
Q9D2R8	28S ribosomal protein S33, mitochondrial OS=Mus musculus OX=10090 GN=Mrps33 PE=1 SV=1	Mrps33	12.459	0.9	0.919		0.942	0.955		1.092	0.926
Q68FD5	Clathrin heavy chain 1 OS=Mus musculus OX=10090 GN=Cltc PE=1 SV=3	Cltc	191.55	0.972	0.996	0.999	1.047	1.029	1.043	0.975	0.982	0.962
Q80UU9	Membrane-associated progesterone receptor component 2 OS=Mus musculus OX=10090 GN=Pgrmc2 PE=1 SV=2	Pgrmc2	23.334	0.89	0.928	0.904	1.03	1.025	0.918	1.004	0.977	0.959
Q8BH59	Calcium-binding mitochondrial carrier protein Aralar1 OS=Mus musculus OX=10090 GN=Slc25a12 PE=1 SV=1	Slc25a12	74.569	0.928	0.868	0.912	1.147	1.162	1.204	1.232	1.157	1.248
Q99K99	Uncharacterized protein C4orf19 homolog OS=Mus musculus OX=10090 PE=1 SV=2	---	33.916
Q9D8X5	CCR4-NOT transcription complex subunit 8 OS=Mus musculus OX=10090 GN=Cnot8 PE=2 SV=1	Cnot8	33.574
O09110	Dual specificity mitogen-activated protein kinase kinase 3 OS=Mus musculus OX=10090 GN=Map2k3 PE=1 SV=2	Map2k3	39.296	0.949	0.969	0.931	1.068	1.132	1.086	0.886	1.157	0.927
Q9CR59	Growth arrest and DNA damage-inducible proteins-interacting protein 1 OS=Mus musculus OX=10090 GN=Gadd45gip1 PE=1 SV=1	Gadd45gip1	25.82	0.953	1	1.01	0.953	0.932	0.87	0.932	1.041	1.092
Q60769	Tumor necrosis factor alpha-induced protein 3 OS=Mus musculus OX=10090 GN=Tnfaip3 PE=1 SV=2	Tnfaip3	87.653
Q8BMG1	ATR-interacting protein OS=Mus musculus OX=10090 GN=Atrip PE=1 SV=2	Atrip	85.547		0.913			1.071			1.23
Q9CQ79	Thioredoxin domain-containing protein 9 OS=Mus musculus OX=10090 GN=Txndc9 PE=1 SV=1	Txndc9	26.259	1.135	1.072		1.005	1.045		1.013	0.998
Q99P72	Reticulon-4 OS=Mus musculus OX=10090 GN=Rtn4 PE=1 SV=2	Rtn4	126.61	1.07	1.074	1.082	1.055	1.047	1.076	1.063	1.059	1.109
P14576	Signal recognition particle 54 kDa protein OS=Mus musculus OX=10090 GN=Srp54 PE=1 SV=2	Srp54	55.72	1.044	0.991	1.015	0.989	1.003	0.988	1.02	0.991	0.957
Q9CR98	Protein FAM136A OS=Mus musculus OX=10090 GN=Fam136a PE=1 SV=1	Fam136a	15.674	1.05	1.005	0.893	0.972	0.899	0.917	0.885	1.176	1.452
Q571F8	Glutaminase liver isoform, mitochondrial OS=Mus musculus OX=10090 GN=Gls2 PE=1 SV=2	Gls2	66.365		1.036			0.988			1.181
O35855	Branched-chain-amino-acid aminotransferase, mitochondrial OS=Mus musculus OX=10090 GN=Bcat2 PE=1 SV=2	Bcat2	44.127	0.926	1.051		0.917	0.947		0.972	0.982
O08709	Peroxiredoxin-6 OS=Mus musculus OX=10090 GN=Prdx6 PE=1 SV=3	Prdx6	24.87	0.935	0.963	0.956	0.737	0.755	0.782	0.83	0.808	0.785
Q61147	Ceruloplasmin OS=Mus musculus OX=10090 GN=Cp PE=1 SV=2	Cp	121.15		1.211			2.013			1.869
P22599	Alpha-1-antitrypsin 1-2 OS=Mus musculus OX=10090 GN=Serpina1b PE=1 SV=2	Serpina1b	45.974		1.126	0.909		1.151	1.17		1.283	1.507
Q9CY64	Biliverdin reductase A OS=Mus musculus OX=10090 GN=Blvra PE=1 SV=1	Blvra	33.524	0.999	0.961	0.963	0.907	0.925	0.897	0.899	0.875	0.94
O88796	Ribonuclease P protein subunit p30 OS=Mus musculus OX=10090 GN=Rpp30 PE=1 SV=1	Rpp30	29.473	1.008	1.02	1.042	1.201	0.9	0.993	1.069	1.021	1.235
Q8VCI5	Peroxisomal biogenesis factor 19 OS=Mus musculus OX=10090 GN=Pex19 PE=1 SV=1	Pex19	32.733	1.018	0.976	1.005	0.969	0.982	1.029	1.027	1.057	0.958
O88196	E3 ubiquitin-protein ligase TTC3 OS=Mus musculus OX=10090 GN=Ttc3 PE=1 SV=2	Ttc3	223.93
Q8K2J4	Coiled-coil domain-containing protein 14 OS=Mus musculus OX=10090 GN=Ccdc14 PE=2 SV=3	Ccdc14	102.63
Q9DB00	GON-4-like protein OS=Mus musculus OX=10090 GN=Gon4l PE=1 SV=3	Gon4l	248.74
P50714	Alpha-defensin 16 OS=Mus musculus OX=10090 GN=Defa16 PE=2 SV=2	Defa16	10.43	0.74	0.797	0.902	1.244	0.96	0.927	0.787	0.803	1.168
Q80W65	Proprotein convertase subtilisin/kexin type 9 OS=Mus musculus OX=10090 GN=Pcsk9 PE=1 SV=2	Pcsk9	74.822	1.22	1.244	1.19	1.157	1.255	1.111	1.236	1.23	1.114
P08775	DNA-directed RNA polymerase II subunit RPB1 OS=Mus musculus OX=10090 GN=Polr2a PE=1 SV=3	Polr2a	217.17	1.01	1.039	1.033	1.08	1.044	1.074	1.138	1.067	1.007
P40336	Vacuolar protein sorting-associated protein 26A OS=Mus musculus OX=10090 GN=Vps26a PE=1 SV=1	Vps26a	38.113	0.978	1	0.973	1.064	0.974	1.033	1.167	1.045	0.964
P59470	DNA-directed RNA polymerase III subunit RPC2 OS=Mus musculus OX=10090 GN=Polr3b PE=1 SV=2	Polr3b	127.71			1.004			1.148			1.14
Q8BU03	Periodic tryptophan protein 2 homolog OS=Mus musculus OX=10090 GN=Pwp2 PE=1 SV=1	Pwp2	102.91		1.038	1.014		1.125	0.973		1.223	1.04
Q61586	Glycerol-3-phosphate acyltransferase 1, mitochondrial OS=Mus musculus OX=10090 GN=Gpam PE=1 SV=2	Gpam	93.703	1.067	1.053	1.035	1.263	0.995	1.105	1.308	1.237	1.361
P12382	ATP-dependent 6-phosphofructokinase, liver type OS=Mus musculus OX=10090 GN=Pfkl PE=1 SV=4	Pfkl	85.359	0.931	0.952	0.954	1.013	1.071	1.02	0.863	0.966	0.903
P61219	DNA-directed RNA polymerases I, II, and III subunit RPABC2 OS=Mus musculus OX=10090 GN=Polr2f PE=2 SV=1	Polr2f	14.464			1.072			1.158			0.958
Q3TC72	Fumarylacetoacetate hydrolase domain-containing protein 2A OS=Mus musculus OX=10090 GN=Fahd2 PE=1 SV=1	Fahd2	34.69		0.961	0.82		0.919	0.914		0.864	0.985
Q8C5N3	Pre-mRNA-splicing factor CWC22 homolog OS=Mus musculus OX=10090 GN=Cwc22 PE=1 SV=1	Cwc22	104.77	0.938	0.934	0.959	1.151	1.052	1.102	1.169	1.22	1.171
A2AB59	Rho GTPase-activating protein 27 OS=Mus musculus OX=10090 GN=Arhgap27 PE=1 SV=1	Arhgap27	97.047	0.97	0.905	0.996	1.1	1.064	1.028	1.048	0.996	1.058
Q9CRT8	Exportin-T OS=Mus musculus OX=10090 GN=Xpot PE=1 SV=3	Xpot	109.73	0.998	1.011	0.918	1.05	0.966	1.017	0.928	0.975	1.007
P48771	Cytochrome c oxidase subunit 7A2, mitochondrial OS=Mus musculus OX=10090 GN=Cox7a2 PE=1 SV=2	Cox7a2	9.2908	0.922	0.964	0.925	1.016	0.978	0.965	0.957	0.921	0.985
P97429	Annexin A4 OS=Mus musculus OX=10090 GN=Anxa4 PE=1 SV=4	Anxa4	35.915	0.992	0.977	0.99	1.034	1.032	1.037	1.02	0.936	0.957
P49452	Centromere protein C OS=Mus musculus OX=10090 GN=Cenpc PE=1 SV=2	Cenpc	102.15	1.084	1.071	1.073	1.053	0.887	0.995	1.185	0.976	1.015
P28654	Decorin OS=Mus musculus OX=10090 GN=Dcn PE=1 SV=1	Dcn	39.809
Q3TWW8	Serine/arginine-rich splicing factor 6 OS=Mus musculus OX=10090 GN=Srsf6 PE=1 SV=1	Srsf6	39.025	0.997	0.938	1.011	1.096	1.067	1.046	1.06	1.049	1.019
O35988	Syndecan-4 OS=Mus musculus OX=10090 GN=Sdc4 PE=1 SV=1	Sdc4	21.482	1.458	1.608	1.498	1.195	1.277	1.359	1.442	1.355	1.389
P97466	Noggin OS=Mus musculus OX=10090 GN=Nog PE=2 SV=1	Nog	25.77	0.373	0.411	0.398	0.488	0.539	0.492	0.911	0.91	0.89
Q8BM85	TBC domain-containing protein kinase-like protein OS=Mus musculus OX=10090 GN=Tbck PE=1 SV=1	Tbck	86.37
P62311	U6 snRNA-associated Sm-like protein LSm3 OS=Mus musculus OX=10090 GN=Lsm3 PE=1 SV=2	Lsm3	11.845	1.048	0.935	1.045	0.87	1.052	0.822	0.859	1.169	0.893
Q8BIL5	Protein Hook homolog 1 OS=Mus musculus OX=10090 GN=Hook1 PE=1 SV=2	Hook1	84.438	0.952	0.992	0.984	0.908	0.994	0.926	1.033	0.945	0.955
Q60992	Guanine nucleotide exchange factor VAV2 OS=Mus musculus OX=10090 GN=Vav2 PE=1 SV=1	Vav2	99.914			1.136			1.151			1.076
Q9R233	Tapasin OS=Mus musculus OX=10090 GN=Tapbp PE=1 SV=2	Tapbp	49.736	0.932	0.918	0.914	1.124	1.084	1.098	1.055	0.993	1.065
Q9CQD4	Charged multivesicular body protein 1b-2 OS=Mus musculus OX=10090 GN=Chmp1b2 PE=2 SV=2	Chmp1b2	22.161	0.942			1.044			1.077
Q8R0X2	CDK2-associated and cullin domain-containing protein 1 OS=Mus musculus OX=10090 GN=Cacul1 PE=2 SV=1	Cacul1	42.106
P42337	Phosphatidylinositol 4,5-bisphosphate 3-kinase catalytic subunit alpha isoform OS=Mus musculus OX=10090 GN=Pik3ca PE=1 SV=2	Pik3ca	124.41	1.114	1.163		0.982	0.907		1.137	1.1
Q9CZL5	Pterin-4-alpha-carbinolamine dehydratase 2 OS=Mus musculus OX=10090 GN=Pcbd2 PE=1 SV=2	Pcbd2	14.83	1.061	1.01	1.065	1.038	0.93	0.834	1.111	1.037	1.029
Q8VDW0	ATP-dependent RNA helicase DDX39A OS=Mus musculus OX=10090 GN=Ddx39a PE=1 SV=1	Ddx39a	49.067	1.026	1.031	1.019	1.116	1.073	1.181	1.135	1.07	1.056
Q91WK0	Leucine-rich repeat flightless-interacting protein 2 OS=Mus musculus OX=10090 GN=Lrrfip2 PE=1 SV=1	Lrrfip2	47.147		1.069	1.046		0.927	1.001		0.972	1.069
Q9JLV6	Bifunctional polynucleotide phosphatase/kinase OS=Mus musculus OX=10090 GN=Pnkp PE=1 SV=2	Pnkp	57.223	1.032	1.004	0.985	1.004	0.928	0.92	1.053	0.973	1.037
Q61301	Catenin alpha-2 OS=Mus musculus OX=10090 GN=Ctnna2 PE=1 SV=3	Ctnna2	105.28
Q5SUR0	Phosphoribosylformylglycinamidine synthase OS=Mus musculus OX=10090 GN=Pfas PE=1 SV=1	Pfas	144.63	1.047	1.026	1.082	0.904	0.871	0.916	0.968	1.018	1.037
Q99L48	60S ribosomal export protein NMD3 OS=Mus musculus OX=10090 GN=Nmd3 PE=1 SV=1	Nmd3	57.611	0.956		0.988	1.163		1.115	1.102		1.099
P25206	DNA replication licensing factor MCM3 OS=Mus musculus OX=10090 GN=Mcm3 PE=1 SV=2	Mcm3	91.545	1.011	0.995	0.984	1.065	1.06	1.115	0.987	1.039	1.012
Q8CG72	Poly(ADP-ribose) glycohydrolase ARH3 OS=Mus musculus OX=10090 GN=Adprhl2 PE=1 SV=1	Adprhl2	39.414			0.885			0.78			0.931
Q8VE37	Regulator of chromosome condensation OS=Mus musculus OX=10090 GN=Rcc1 PE=1 SV=1	Rcc1	44.93	0.982	1.002	1.004	1.118	1.053	1.077	1.035	0.992	0.959
Q8VE10	N-alpha-acetyltransferase 40 OS=Mus musculus OX=10090 GN=Naa40 PE=1 SV=1	Naa40	27.229	1.091	1.065	0.854	1.211	1.023	1.233	1.476	1.126	1.34
Q9DBA9	General transcription factor IIH subunit 1 OS=Mus musculus OX=10090 GN=Gtf2h1 PE=1 SV=2	Gtf2h1	61.851		1.077			0.986			1.044
P17563	Methanethiol oxidase OS=Mus musculus OX=10090 GN=Selenbp1 PE=1 SV=2	Selenbp1	52.513	1.027	1.044	1.02	0.882	0.939	0.906	0.767	0.874	0.756
Q8JZX4	Splicing factor 45 OS=Mus musculus OX=10090 GN=Rbm17 PE=1 SV=1	Rbm17	45.303	1.072	1.099	0.968	1.025	1.01	1.049	1.023	1.073	1.203
Q9D8H7	Metalloendopeptidase OMA1, mitochondrial OS=Mus musculus OX=10090 GN=Oma1 PE=1 SV=1	Oma1	58.877	0.938			1.212			1.253
Q9D2E2	Target of EGR1 protein 1 OS=Mus musculus OX=10090 GN=Toe1 PE=1 SV=1	Toe1	56.87	1.038	1.033	1.085	1.105	1.079	1.064	1.316	1.158	1.12
P53569	CCAAT/enhancer-binding protein zeta OS=Mus musculus OX=10090 GN=Cebpz PE=1 SV=2	Cebpz	120.26	1.047	1.055	1.042	1.14	1.198	1.137	1.155	1.13	1.152
Q7TS68	Putative methyltransferase NSUN6 OS=Mus musculus OX=10090 GN=Nsun6 PE=2 SV=2	Nsun6	52.278
Q9D3P8	Plasminogen receptor (KT) OS=Mus musculus OX=10090 GN=Plgrkt PE=1 SV=1	Plgrkt	17.261	0.935	0.899	0.836	1.095	1.018	1.111	1.015	1.032	0.924
Q9DC40	Telomere length regulation protein TEL2 homolog OS=Mus musculus OX=10090 GN=Telo2 PE=1 SV=2	Telo2	93.312
Q6NS57	Mitogen-activated protein kinase-binding protein 1 OS=Mus musculus OX=10090 GN=Mapkbp1 PE=1 SV=1	Mapkbp1	162.89		0.92			1.064			1.031
Q4FZF3	Probable ATP-dependent RNA helicase DDX49 OS=Mus musculus OX=10090 GN=Ddx49 PE=2 SV=1	Ddx49	54.093	1.072	1.03	0.994	1.103	1.191	1.186	1.249	1.115	1.029
Q8BKT7	THO complex subunit 5 homolog OS=Mus musculus OX=10090 GN=Thoc5 PE=1 SV=2	Thoc5	78.685	0.937	0.881	0.965	1.115	1.09	1.133	0.988	0.982	1.022
P16460	Argininosuccinate synthase OS=Mus musculus OX=10090 GN=Ass1 PE=1 SV=1	Ass1	46.584	1.092	1.163	1.116	1.132	1.144	1.23	1.103	1.076	1.087
Q8BTW3	Exosome complex component MTR3 OS=Mus musculus OX=10090 GN=Exosc6 PE=1 SV=1	Exosc6	28.37	0.711	0.747	0.85	0.887	1.002	0.983	1.591	1.429	1.45
Q2TBA3	Mucosa-associated lymphoid tissue lymphoma translocation protein 1 homolog OS=Mus musculus OX=10090 GN=Malt1 PE=1 SV=2	Malt1	93.215	1.048		1.155	1.121		0.954	0.902		0.971
Q8BJM7	S-adenosyl-L-methionine-dependent tRNA 4-demethylwyosine synthase OS=Mus musculus OX=10090 GN=Tyw1 PE=1 SV=1	Tyw1	81.598		1.074	1.081		1.099	1.071		0.996	1.409
Q922B2	Aspartate--tRNA ligase, cytoplasmic OS=Mus musculus OX=10090 GN=Dars PE=1 SV=2	Dars	57.147	0.962	0.995	0.978	1.045	1.024	1.021	0.997	0.947	0.976
Q64012	RNA-binding protein Raly OS=Mus musculus OX=10090 GN=Raly PE=1 SV=3	Raly	33.188	0.92	1.003	0.969	0.927	0.983	0.956	1.053	1.069	0.952
Q9Z2C9	Myotubularin-related protein 7 OS=Mus musculus OX=10090 GN=Mtmr7 PE=1 SV=2	Mtmr7	75.607
Q9JJ06	Glycoprotein-N-acetylgalactosamine 3-beta-galactosyltransferase 1 OS=Mus musculus OX=10090 GN=C1galt1 PE=1 SV=1	C1galt1	42.304		0.935			1.114			1.149
Q8BXA7	PH domain leucine-rich repeat-containing protein phosphatase 2 OS=Mus musculus OX=10090 GN=Phlpp2 PE=1 SV=3	Phlpp2	145.95			1.013			1.023			1.017
Q8BTH8	Casein kinase I isoform gamma-1 OS=Mus musculus OX=10090 GN=Csnk1g1 PE=1 SV=2	Csnk1g1	52.743	1.002	0.931	0.997	1.06	1.019	0.942	1.087	0.966	0.919
Q9EQC5	N-terminal kinase-like protein OS=Mus musculus OX=10090 GN=Scyl1 PE=1 SV=1	Scyl1	89.159	0.981		0.97	1.237		1.182	1.076		1.137
Q8R3C0	Mini-chromosome maintenance complex-binding protein OS=Mus musculus OX=10090 GN=Mcmbp PE=1 SV=1	Mcmbp	72.89	1.028	1.021	1.041	1.073	1.015	1.141	1.007	0.988	1.051
Q8BGF7	PAN2-PAN3 deadenylation complex catalytic subunit Pan2 OS=Mus musculus OX=10090 GN=Pan2 PE=1 SV=1	Pan2	135.25			0.822			1.024			1.204
A0JLY1	Coiled-coil domain-containing protein 173 OS=Mus musculus OX=10090 GN=Ccdc173 PE=2 SV=1	Ccdc173	65.131
Q5DW34	Histone-lysine N-methyltransferase EHMT1 OS=Mus musculus OX=10090 GN=Ehmt1 PE=1 SV=2	Ehmt1	142		0.921	1.01		1.036	0.914		1.231	0.957
P08113	Endoplasmin OS=Mus musculus OX=10090 GN=Hsp90b1 PE=1 SV=2	Hsp90b1	92.475	1.001	0.986	0.99	1.057	1.072	1.054	1.046	1.003	1.056
Q5RJG1	Nucleolar protein 10 OS=Mus musculus OX=10090 GN=Nol10 PE=2 SV=1	Nol10	80.076	1.137	1.015	1.102	0.978	1.038	1.017	0.981	1.099	1.004
Q9D0F9	Phosphoglucomutase-1 OS=Mus musculus OX=10090 GN=Pgm1 PE=1 SV=4	Pgm1	61.417	0.955	0.974	0.938	0.75	0.785	0.802	0.711	0.759	0.749
O88662	Epithelial membrane protein 2 OS=Mus musculus OX=10090 GN=Emp2 PE=1 SV=1	Emp2	19.747
Q8CHC4	Synaptojanin-1 OS=Mus musculus OX=10090 GN=Synj1 PE=1 SV=3	Synj1	172.62			1.038			1.283			1.303
Q6ZQB6	Inositol hexakisphosphate and diphosphoinositol-pentakisphosphate kinase 2 OS=Mus musculus OX=10090 GN=Ppip5k2 PE=1 SV=3	Ppip5k2	128.43	0.921	0.917	0.985	1.051	0.968	1.034	1.039	0.973	1.05
Q9CZG9	PDZ domain-containing protein 11 OS=Mus musculus OX=10090 GN=Pdzd11 PE=1 SV=1	Pdzd11	16.182		0.987	0.971		0.944	0.984		1.076	1.015
Q8BUV6	U7 snRNA-associated Sm-like protein LSm11 OS=Mus musculus OX=10090 GN=Lsm11 PE=1 SV=1	Lsm11	39.906
O08917	Flotillin-1 OS=Mus musculus OX=10090 GN=Flot1 PE=1 SV=1	Flot1	47.513
P14206	40S ribosomal protein SA OS=Mus musculus OX=10090 GN=Rpsa PE=1 SV=4	Rpsa	32.838	1.086	1.087	1.089	1.108	1.046	1.06	1.044	1.044	1.04
Q0VBM2	Protein FAM83B OS=Mus musculus OX=10090 GN=Fam83b PE=2 SV=1	Fam83b	114.67	0.908	0.919	1.009	1.155	1.085	1.002	0.937	0.997	0.956
P97310	DNA replication licensing factor MCM2 OS=Mus musculus OX=10090 GN=Mcm2 PE=1 SV=3	Mcm2	102.08	0.979	0.978	0.989	1	1.003	1.001	1.013	1.027	1.015
Q6PAV2	Probable E3 ubiquitin-protein ligase HERC4 OS=Mus musculus OX=10090 GN=Herc4 PE=1 SV=2	Herc4	118.41	0.955	0.945	0.964	1.09	1.075	1.027	0.964	1.017	0.931
Q8BPG6	Inactive C-alpha-formylglycine-generating enzyme 2 OS=Mus musculus OX=10090 GN=Sumf2 PE=1 SV=2	Sumf2	34.737		1.043	1.068		1.038	1.083		1.018	1.055
Q3UDE2	Tubulin--tyrosine ligase-like protein 12 OS=Mus musculus OX=10090 GN=Ttll12 PE=1 SV=1	Ttll12	74.042	0.986	1.026	1.03	0.922	0.923	0.921	0.976	0.823	0.942
Q60739	BAG family molecular chaperone regulator 1 OS=Mus musculus OX=10090 GN=Bag1 PE=1 SV=3	Bag1	39.74		0.974			0.853			0.852
Q91YN5	UDP-N-acetylhexosamine pyrophosphorylase OS=Mus musculus OX=10090 GN=Uap1 PE=1 SV=1	Uap1	58.608	1.018	1.05	1.013	0.915	0.969	0.907	0.951	0.962	0.936
Q80YE7	Death-associated protein kinase 1 OS=Mus musculus OX=10090 GN=Dapk1 PE=1 SV=3	Dapk1	161.44		0.905			0.936			0.868
O88876	Short-chain dehydrogenase/reductase 3 OS=Mus musculus OX=10090 GN=Dhrs3 PE=1 SV=2	Dhrs3	33.652		0.921			1.01			0.953
Q5EBG8	Uncharacterized protein C1orf50 homolog OS=Mus musculus OX=10090 PE=1 SV=1	---	21.862	1.044	1.138		1.002	1.047		0.957	1.03
Q8BZ98	Dynamin-3 OS=Mus musculus OX=10090 GN=Dnm3 PE=1 SV=1	Dnm3	97.189	0.847			1.086			1.191
Q7M757	Lys-63-specific deubiquitinase BRCC36-like OS=Mus musculus OX=10090 GN=C6.1al PE=2 SV=1	C6.1al	33.079	1.066	1.077	1.077	0.996	1.056	0.988	0.992	0.995	1.049
O70589	Peripheral plasma membrane protein CASK OS=Mus musculus OX=10090 GN=Cask PE=1 SV=2	Cask	105.11	0.97	0.974	1.03	0.957	1.032	1.046	0.989	1.046	1.015
Q9JL60	Glucocorticoid modulatory element-binding protein 1 OS=Mus musculus OX=10090 GN=Gmeb1 PE=1 SV=2	Gmeb1	61.057
Q9CS00	Cactin OS=Mus musculus OX=10090 GN=Cactin PE=1 SV=2	Cactin	90.66	1.035			1.089			1.227
Q8K2T8	RNA polymerase II-associated factor 1 homolog OS=Mus musculus OX=10090 GN=Paf1 PE=1 SV=1	Paf1	60.518	1.058	1.074	1.048	1.085	1.051	1.057	1.075	1.053	1.103
Q8BGT5	Alanine aminotransferase 2 OS=Mus musculus OX=10090 GN=Gpt2 PE=1 SV=1	Gpt2	57.943		1.077			1.121			1.025
P70188	Kinesin-associated protein 3 OS=Mus musculus OX=10090 GN=Kifap3 PE=1 SV=1	Kifap3	91.29
O54791	Transcription factor MafF OS=Mus musculus OX=10090 GN=Maff PE=2 SV=1	Maff	16.954
Q8R3N1	Nucleolar protein 14 OS=Mus musculus OX=10090 GN=Nop14 PE=1 SV=2	Nop14	98.768	1.108	1.092	1.072	0.987	0.946	0.927	1.051	1.029	1.038
Q8BY02	NF-kappa-B-repressing factor OS=Mus musculus OX=10090 GN=Nkrf PE=2 SV=3	Nkrf	77.738	0.985	0.968	0.993	1.009	1.001	1.07	1.071	1.009	1.08
Q91W36	Ubiquitin carboxyl-terminal hydrolase 3 OS=Mus musculus OX=10090 GN=Usp3 PE=2 SV=1	Usp3	58.867	1.018	0.956	1.048	1.088	1.004	1.03	1.054	0.976	1.048
Q3TPE9	Ankyrin repeat and MYND domain-containing protein 2 OS=Mus musculus OX=10090 GN=Ankmy2 PE=1 SV=1	Ankmy2	48.774		0.991	0.994		0.902	0.975		0.901	0.908
Q9D0F1	Kinetochore protein NDC80 homolog OS=Mus musculus OX=10090 GN=Ndc80 PE=1 SV=1	Ndc80	73.961
P83877	Thioredoxin-like protein 4A OS=Mus musculus OX=10090 GN=Txnl4a PE=1 SV=1	Txnl4a	16.786	1.059	1.075	1.12	0.837	0.844	0.952	0.966	0.869	0.97
Q9ERI5	Bifunctional arginine demethylase and lysyl-hydroxylase JMJD6 OS=Mus musculus OX=10090 GN=Jmjd6 PE=1 SV=2	Jmjd6	46.567
O54825	Bystin OS=Mus musculus OX=10090 GN=Bysl PE=1 SV=3	Bysl	49.783	1.162	1.035	1.087	0.966	1.068	1.107	1.067	1.017	1.03
Q8CIB6	Transmembrane protein 230 OS=Mus musculus OX=10090 GN=Tmem230 PE=1 SV=1	Tmem230	13.188	1.089			1.058			1.12
Q00899	Transcriptional repressor protein YY1 OS=Mus musculus OX=10090 GN=Yy1 PE=1 SV=1	Yy1	44.716	0.985	1.007	0.914	0.855	0.944	0.845	0.966	0.931	1.015
Q9JJH1	Ribonuclease 4 OS=Mus musculus OX=10090 GN=Rnase4 PE=1 SV=1	Rnase4	17.024	0.953	0.938	0.91	0.776	0.731	0.671	0.907	0.825	0.728
Q8WTY4	Anamorsin OS=Mus musculus OX=10090 GN=Ciapin1 PE=1 SV=1	Ciapin1	33.429	1.042	1.083	1.023	0.897	0.859	0.941	1.064	0.945	0.972
Q6PDY2	2-aminoethanethiol dioxygenase OS=Mus musculus OX=10090 GN=Ado PE=1 SV=2	Ado	28.372	1.025	1.06	1.004	0.914	0.83	0.984	0.901	1.013	1.125
P70404	Isocitrate dehydrogenase [NAD] subunit gamma 1, mitochondrial OS=Mus musculus OX=10090 GN=Idh3g PE=1 SV=1	Idh3g	42.785	0.936	0.906	0.957	1.012	1.095	1.019	1.058	1.106	1.058
Q9D7S0	Ly6/PLAUR domain-containing protein 8 OS=Mus musculus OX=10090 GN=Lypd8 PE=1 SV=1	Lypd8	27.524	1.119	1.1	1.128	0.812	0.781	0.794	0.795	0.729	0.766
Q6PEB6	MOB-like protein phocein OS=Mus musculus OX=10090 GN=Mob4 PE=1 SV=1	Mob4	26.032	1.002	1.089	0.919	0.954	0.99	0.883	0.917	0.992	1.037
Q8R418	Endoribonuclease Dicer OS=Mus musculus OX=10090 GN=Dicer1 PE=1 SV=3	Dicer1	216.82		1.03	0.96		1.117	0.989		1.127	1.029
Q61712	DnaJ homolog subfamily C member 1 OS=Mus musculus OX=10090 GN=Dnajc1 PE=1 SV=1	Dnajc1	63.869		1.02			1.039			1.103
Q8BGZ4	Cell division cycle protein 23 homolog OS=Mus musculus OX=10090 GN=Cdc23 PE=1 SV=2	Cdc23	68.561	0.999	0.947	1.028	1.055	1.043	1.078	1.012	1.106	0.992
P22907	Porphobilinogen deaminase OS=Mus musculus OX=10090 GN=Hmbs PE=1 SV=2	Hmbs	39.344	1.008	1.026	1.043	0.734	0.864	0.786	0.795	0.886	1.04
Q9DAU1	Protein canopy homolog 3 OS=Mus musculus OX=10090 GN=Cnpy3 PE=1 SV=1	Cnpy3	30.537		1.011	0.941		0.988	1.129		1.008	1.074
P18242	Cathepsin D OS=Mus musculus OX=10090 GN=Ctsd PE=1 SV=1	Ctsd	44.953	1.036	1.019	0.99	0.934	0.948	0.968	0.968	0.963	0.956
Q9JJI8	60S ribosomal protein L38 OS=Mus musculus OX=10090 GN=Rpl38 PE=1 SV=3	Rpl38	8.2038	1.008	1.03	1.037	0.979	0.87	1.045	1.013	0.865	0.957
Q5SU73	Coilin OS=Mus musculus OX=10090 GN=Coil PE=1 SV=1	Coil	61.916
A2A559	Post-GPI attachment to proteins factor 3 OS=Mus musculus OX=10090 GN=Pgap3 PE=2 SV=1	Pgap3	36.527	0.836			1.166			0.949
Q9CY66	H/ACA ribonucleoprotein complex subunit 1 OS=Mus musculus OX=10090 GN=Gar1 PE=1 SV=1	Gar1	23.474	0.996	0.949	1.013	1.005	1.042	1.007	0.935	0.936	1.004
Q8K2T4	Ubiquinol-cytochrome-c reductase complex assembly factor 3 OS=Mus musculus OX=10090 GN=Uqcc3 PE=1 SV=1	Uqcc3	9.5839
Q9JJ89	Coiled-coil domain-containing protein 86 OS=Mus musculus OX=10090 GN=Ccdc86 PE=1 SV=2	Ccdc86	46.486
P27782	Lymphoid enhancer-binding factor 1 OS=Mus musculus OX=10090 GN=Lef1 PE=1 SV=1	Lef1	44.058
Q9QZS5	Serine/threonine-protein kinase Sgk2 OS=Mus musculus OX=10090 GN=Sgk2 PE=1 SV=1	Sgk2	41.359
Q80U95	Ubiquitin-protein ligase E3C OS=Mus musculus OX=10090 GN=Ube3c PE=1 SV=2	Ube3c	123.97	0.878	0.979	1.011	1.189	1.025	1.085	0.927	0.994	0.955
Q91VE6	MKI67 FHA domain-interacting nucleolar phosphoprotein OS=Mus musculus OX=10090 GN=Nifk PE=1 SV=1	Nifk	36.265	1.062	1.131	1.073	1.062	0.993	0.993	1.111	1.138	1.116
P84244	Histone H3.3 OS=Mus musculus OX=10090 GN=H3f3a PE=1 SV=2	H3f3a	15.328	0.763	0.789	0.831	0.996	1.051	1.062	1.52	1.344	1.589
Q8CCH2	NHL repeat-containing protein 3 OS=Mus musculus OX=10090 GN=Nhlrc3 PE=1 SV=1	Nhlrc3	38.195
Q8BHN3	Neutral alpha-glucosidase AB OS=Mus musculus OX=10090 GN=Ganab PE=1 SV=1	Ganab	106.91	0.978	0.965	0.938	1.034	1	0.988	0.977	1	0.977
Q91Z58	Uncharacterized protein C6orf132 homolog OS=Mus musculus OX=10090 PE=1 SV=2	---	127.88	1.035	1.141	1.111	1.212	1.136	1.051	1.262	1.071	1.233
P97807	Fumarate hydratase, mitochondrial OS=Mus musculus OX=10090 GN=Fh PE=1 SV=3	Fh	54.356	0.97	0.956	0.957	0.866	0.865	0.881	0.908	0.909	0.947
Q9D869	Calcineurin B homologous protein 2 OS=Mus musculus OX=10090 GN=Chp2 PE=2 SV=4	Chp2	22.566	0.985			1.089			1.174
Q9CR11	YEATS domain-containing protein 4 OS=Mus musculus OX=10090 GN=Yeats4 PE=2 SV=1	Yeats4	26.529
Q9D0N7	Chromatin assembly factor 1 subunit B OS=Mus musculus OX=10090 GN=Chaf1b PE=1 SV=1	Chaf1b	63.131	0.994	1.083	1.082	0.958	1.111	0.994	1.086	1.162	1.136
Q8BM96	Adhesion G-protein coupled receptor G7 OS=Mus musculus OX=10090 GN=Adgrg7 PE=1 SV=2	Adgrg7	87.683	0.959	0.954	0.901	0.933	1.073	1.065	0.903	0.936	0.953
Q811U4	Mitofusin-1 OS=Mus musculus OX=10090 GN=Mfn1 PE=1 SV=3	Mfn1	83.725	1.045	0.968	1.102	1.149	1.139	0.89	1.155	1.064	1.046
Q02257	Junction plakoglobin OS=Mus musculus OX=10090 GN=Jup PE=1 SV=3	Jup	81.8	1.144	1.085	1.127	1.125	1.114	1.124	1.044	1.064	1.019
Q9Z1K6	E3 ubiquitin-protein ligase ARIH2 OS=Mus musculus OX=10090 GN=Arih2 PE=1 SV=1	Arih2	57.696			0.939			1.037			0.966
Q8BX94	Oxysterol-binding protein-related protein 2 OS=Mus musculus OX=10090 GN=Osbpl2 PE=1 SV=1	Osbpl2	55.384		0.908			1.155			1.193
Q9CQV8	14-3-3 protein beta/alpha OS=Mus musculus OX=10090 GN=Ywhab PE=1 SV=3	Ywhab	28.086	0.966	0.981	0.968	0.804	0.882	0.897	0.878	0.882	0.924
Q8R2S9	Actin-related protein 8 OS=Mus musculus OX=10090 GN=Actr8 PE=2 SV=1	Actr8	70.545	1.066	1.001	0.979	1.099	0.93	1.269	0.961	1.17	1.087
Q9Z1E4	Glycogen [starch] synthase, muscle OS=Mus musculus OX=10090 GN=Gys1 PE=1 SV=2	Gys1	83.926	1.004	1.011	1.04	1.01	1.015	1.054	0.998	1.327	0.951
Q80UK8	Integrator complex subunit 2 OS=Mus musculus OX=10090 GN=Ints2 PE=1 SV=2	Ints2	133.51	1.113	0.949	1.041	1.164	1.07	1.218	1.088	1.199	1.181
Q9CQ71	Replication protein A 14 kDa subunit OS=Mus musculus OX=10090 GN=Rpa3 PE=1 SV=1	Rpa3	13.584	1.083	1.015	1.054	0.828	0.942	0.878	0.931	0.89	1.038
Q61164	Transcriptional repressor CTCF OS=Mus musculus OX=10090 GN=Ctcf PE=1 SV=2	Ctcf	83.745	1.091	1.053	0.964	0.862	1.002	0.965	0.976	1	1.035
P98195	Probable phospholipid-transporting ATPase IIB OS=Mus musculus OX=10090 GN=Atp9b PE=1 SV=4	Atp9b	129.02		0.931			1.117			0.978
Q9D786	HAUS augmin-like complex subunit 5 OS=Mus musculus OX=10090 GN=Haus5 PE=1 SV=1	Haus5	69.571			1.012			1.011			1.093
Q07139	Protein ECT2 OS=Mus musculus OX=10090 GN=Ect2 PE=1 SV=2	Ect2	103.13
Q9CRC8	Leucine-rich repeat-containing protein 40 OS=Mus musculus OX=10090 GN=Lrrc40 PE=1 SV=2	Lrrc40	68.075	1.046	1.021	1.04	0.938	0.957	0.983	0.993	0.911	0.96
Q9D7A6	Signal recognition particle 19 kDa protein OS=Mus musculus OX=10090 GN=Srp19 PE=1 SV=1	Srp19	16.191	1.028	0.839	0.955	1.047	0.937	0.962	1.122	1.121	0.974
Q9D8V7	Signal peptidase complex catalytic subunit SEC11C OS=Mus musculus OX=10090 GN=Sec11c PE=1 SV=3	Sec11c	21.66	0.994	0.999	0.965	1.109	1.231	1.019	1.047	1.164	1.06
Q5XFZ0	UPF0711 protein C18orf21 homolog OS=Mus musculus OX=10090 PE=2 SV=2	---	24.122	1.029	1.073	1.088	1.113	1.119	1.17	1.171	1.158	1.059
Q99L47	Hsc70-interacting protein OS=Mus musculus OX=10090 GN=St13 PE=1 SV=1	St13	41.655	1.072	1.046	1.069	0.902	0.854	0.889	0.975	0.882	0.917
Q91X21	Uncharacterized protein KIAA2013 OS=Mus musculus OX=10090 GN=Kiaa2013 PE=1 SV=1	Kiaa2013	69.424		0.978			1.24			1.051
Q6NS82	Reticulophagy regulator 2 OS=Mus musculus OX=10090 GN=Retreg2 PE=1 SV=2	Retreg2	57.541	1.093	1.116		1.039	0.988		1.243	1.325
Q9CQV4	Reticulophagy regulator 3 OS=Mus musculus OX=10090 GN=Retreg3 PE=1 SV=1	Retreg3	51.637			0.894			0.962			1.061
Q99JR6	Nicotinamide/nicotinic acid mononucleotide adenylyltransferase 3 OS=Mus musculus OX=10090 GN=Nmnat3 PE=1 SV=1	Nmnat3	27.702	0.864		1.081	1.105		0.898	1.038		1.03
Q9JM13	Rab5 GDP/GTP exchange factor OS=Mus musculus OX=10090 GN=Rabgef1 PE=1 SV=1	Rabgef1	56.868	1.028	1.056	1.013	0.964	1.006	0.992	1.006	0.888	0.99
P62835	Ras-related protein Rap-1A OS=Mus musculus OX=10090 GN=Rap1a PE=1 SV=1	Rap1a	20.987	0.999	1.057	1.032	1.018	1.132	1.013	0.974	0.943	0.978
Q9D9K3	Cell death regulator Aven OS=Mus musculus OX=10090 GN=Aven PE=1 SV=2	Aven	37.195		1.043			1.033			1.06
Q9JHS3	Ragulator complex protein LAMTOR2 OS=Mus musculus OX=10090 GN=Lamtor2 PE=1 SV=1	Lamtor2	13.48	1.116	1.123	1.096	0.994	1.079	0.94	1.087	1.048	0.984
P61957	Small ubiquitin-related modifier 2 OS=Mus musculus OX=10090 GN=Sumo2 PE=1 SV=1	Sumo2	10.871		1.109	1.075		0.837	0.908		0.864	1.011
Q8BI29	Specifically androgen-regulated gene protein OS=Mus musculus OX=10090 GN=Sarg PE=1 SV=2	Sarg	65.091		1.163	1.266		1.13	1.034		1.157	1.12
Q9QZ73	DCN1-like protein 1 OS=Mus musculus OX=10090 GN=Dcun1d1 PE=2 SV=1	Dcun1d1	30.097	0.91	0.969	0.957	0.812	0.861	0.835	0.861	0.88	0.891
Q8CBC4	Consortin OS=Mus musculus OX=10090 GN=Cnst PE=1 SV=1	Cnst	76.865
A2AS55	Ankyrin repeat domain-containing protein 16 OS=Mus musculus OX=10090 GN=Ankrd16 PE=1 SV=1	Ankrd16	39.776
Q91YE6	Importin-9 OS=Mus musculus OX=10090 GN=Ipo9 PE=1 SV=3	Ipo9	116.05	1.035	1.003	1.008	1.027	1.011	0.979	1.04	0.98	1.022
Q8BHS3	Pre-mRNA-splicing factor RBM22 OS=Mus musculus OX=10090 GN=Rbm22 PE=1 SV=1	Rbm22	46.895	1.018	0.858	0.957	0.92	0.947	0.966	0.889	0.975	1.272
Q9R1T2	SUMO-activating enzyme subunit 1 OS=Mus musculus OX=10090 GN=Sae1 PE=1 SV=1	Sae1	38.62	1.046	1.05	0.993	0.923	0.899	0.901	0.96	0.969	0.96
P48962	ADP/ATP translocase 1 OS=Mus musculus OX=10090 GN=Slc25a4 PE=1 SV=4	Slc25a4	32.904	0.998	1.002	1.017	1.144	1.207	1.195	1.008	1.102	1.15
Q9D8U8	Sorting nexin-5 OS=Mus musculus OX=10090 GN=Snx5 PE=1 SV=1	Snx5	46.797	1.014	1.01	1.012	0.894	0.87	0.97	0.859	0.834	0.896
Q9CQE3	28S ribosomal protein S17, mitochondrial OS=Mus musculus OX=10090 GN=Mrps17 PE=1 SV=1	Mrps17	13.382	0.93	0.917	0.87	1.041	1.052	1.14	0.943	0.833	0.961
P19182	Interferon-related developmental regulator 1 OS=Mus musculus OX=10090 GN=Ifrd1 PE=1 SV=2	Ifrd1	49.935
Q99PL5	Ribosome-binding protein 1 OS=Mus musculus OX=10090 GN=Rrbp1 PE=1 SV=2	Rrbp1	172.88	1.033	1.031	1.033	0.979	1.011	1.009	1.054	1.068	1.027
Q8VDL4	ADP-dependent glucokinase OS=Mus musculus OX=10090 GN=Adpgk PE=1 SV=2	Adpgk	53.902	0.981	1.056	1.016	1.201	1.176	1.13	1.191	1.228	1.292
Q9ESD7	Dysferlin OS=Mus musculus OX=10090 GN=Dysf PE=1 SV=3	Dysf	237.91			0.965			0.802			0.912
Q99JF5	Diphosphomevalonate decarboxylase OS=Mus musculus OX=10090 GN=Mvd PE=1 SV=2	Mvd	44.072	0.959	0.913	1.05	0.862	0.8	0.864	0.856	0.779	0.964
Q922P9	Putative oxidoreductase GLYR1 OS=Mus musculus OX=10090 GN=Glyr1 PE=1 SV=1	Glyr1	59.715	1.049	0.966	1.02	0.986	1.082	1.075	1.055	1.007	1.026
P52196	Thiosulfate sulfurtransferase OS=Mus musculus OX=10090 GN=Tst PE=1 SV=3	Tst	33.466	1.004	0.996	0.997	0.987	0.945	0.913	0.869	0.934	1.077
Q922D8	C-1-tetrahydrofolate synthase, cytoplasmic OS=Mus musculus OX=10090 GN=Mthfd1 PE=1 SV=4	Mthfd1	101.2	0.996	0.994	1	0.962	0.928	0.953	0.945	0.939	0.951
P0C0A3	Charged multivesicular body protein 6 OS=Mus musculus OX=10090 GN=Chmp6 PE=1 SV=2	Chmp6	23.415	1.1	1.034	0.985	1.004	1.014	0.922	0.929	0.938	0.887
P97318	Disabled homolog 1 OS=Mus musculus OX=10090 GN=Dab1 PE=1 SV=2	Dab1	63.577
Q8BKJ9	NAD-dependent protein deacetylase sirtuin-7 OS=Mus musculus OX=10090 GN=Sirt7 PE=1 SV=2	Sirt7	45.145	0.978		0.947	1.216		1.398	1.089		1.046
O35945	Aldehyde dehydrogenase, cytosolic 1 OS=Mus musculus OX=10090 GN=Aldh1a7 PE=1 SV=1	Aldh1a7	54.587	0.923	0.937	0.969	0.902	0.946	0.915	0.85	0.956	0.945
Q9R112	Sulfide:quinone oxidoreductase, mitochondrial OS=Mus musculus OX=10090 GN=Sqor PE=1 SV=3	Sqor	50.282	0.926	0.926	0.914	1.105	1.122	1.127	1.007	1.1	1.039
Q9JJG9	Nitric oxide-associated protein 1 OS=Mus musculus OX=10090 GN=Noa1 PE=1 SV=1	Noa1	77.378	0.902	0.829	0.905	0.98	1.033	0.976	0.964	1.026	0.913
Q8CFV9	Riboflavin kinase OS=Mus musculus OX=10090 GN=Rfk PE=1 SV=2	Rfk	17.437	0.983	0.931	0.987	0.902	0.898	0.957	0.936	0.872	0.925
Q8C6M1	Ubiquitin carboxyl-terminal hydrolase 20 OS=Mus musculus OX=10090 GN=Usp20 PE=1 SV=1	Usp20	102.14
B1AXP6	Mitochondrial import receptor subunit TOM5 homolog OS=Mus musculus OX=10090 GN=Tomm5 PE=3 SV=1	Tomm5	6.0372	1.038	0.956	0.969	1.234	1.136	1.166	1.16	1.069	1.125
Q9D4H9	PHD finger protein 14 OS=Mus musculus OX=10090 GN=Phf14 PE=1 SV=1	Phf14	99.104		1.134			0.872			1.055
Q9WUZ9	Ectonucleoside triphosphate diphosphohydrolase 5 OS=Mus musculus OX=10090 GN=Entpd5 PE=1 SV=1	Entpd5	47.101	0.787	0.814	0.786	0.976	1.03	0.971	1.123	1.012	1.01
Q03147	Cyclin-dependent kinase 7 OS=Mus musculus OX=10090 GN=Cdk7 PE=1 SV=2	Cdk7	38.968	1.051	1.134	1.107	1.116	1	1.048	1.055	1.137	1.146
P33609	DNA polymerase alpha catalytic subunit OS=Mus musculus OX=10090 GN=Pola1 PE=1 SV=2	Pola1	167.34	1	0.999	1.035	1.004	0.995	0.972	1.039	1.027	0.908
Q91YM4	FAST kinase domain-containing protein 4 OS=Mus musculus OX=10090 GN=Tbrg4 PE=1 SV=1	Tbrg4	71.513	1.037	0.995	0.983	1.085	1.09	1.083	1.14	1.071	1.033
Q6ZWV3	60S ribosomal protein L10 OS=Mus musculus OX=10090 GN=Rpl10 PE=1 SV=3	Rpl10	24.604	1.076	1.046	1.059	1.101	1.079	1.095	0.998	1.034	1.011
Q99L43	Phosphatidate cytidylyltransferase 2 OS=Mus musculus OX=10090 GN=Cds2 PE=1 SV=1	Cds2	51.313		1.233			1.157			1.175
P97352	Protein S100-A13 OS=Mus musculus OX=10090 GN=S100a13 PE=1 SV=1	S100a13	11.158	1.118	1.015	1.122	1.112	1.093	1.068	1.247	1.098	1.144
Q6P9Q4	FH1/FH2 domain-containing protein 1 OS=Mus musculus OX=10090 GN=Fhod1 PE=1 SV=3	Fhod1	129.6	0.952	0.977		1.114	1.058		0.966	1.018
Q8R2U2	Nucleolus and neural progenitor protein OS=Mus musculus OX=10090 GN=Nepro PE=2 SV=1	Nepro	63.393
Q62348	Translin OS=Mus musculus OX=10090 GN=Tsn PE=1 SV=1	Tsn	26.201	1.054	0.988	1.059	0.865	0.948	0.861	0.937	0.975	0.882
Q91ZA3	Propionyl-CoA carboxylase alpha chain, mitochondrial OS=Mus musculus OX=10090 GN=Pcca PE=1 SV=2	Pcca	79.921	0.914	0.952	0.946	0.977	1.006	1.006	0.938	1.006	1.063
Q9JMD0	BUB3-interacting and GLEBS motif-containing protein ZNF207 OS=Mus musculus OX=10090 GN=Znf207 PE=1 SV=1	Znf207	52.792	1.008	1.028	1.064	1.02	0.971	0.705	1.005	1.012	1.043
Q9D7W5	Mediator of RNA polymerase II transcription subunit 8 OS=Mus musculus OX=10090 GN=Med8 PE=1 SV=1	Med8	29.199		1.068			1.112			1.038
Q8BZR9	Nuclear cap-binding protein subunit 3 OS=Mus musculus OX=10090 GN=Ncbp3 PE=1 SV=1	Ncbp3	70.042	0.935	0.832	0.913	1.229	1.155	1.131	1.317	1.316	1.57
B1AZP2	Disks large-associated protein 4 OS=Mus musculus OX=10090 GN=Dlgap4 PE=1 SV=1	Dlgap4	108.04		0.9			1.009			1.221
Q99M03	RWD domain-containing protein 2B OS=Mus musculus OX=10090 GN=Rwdd2b PE=2 SV=1	Rwdd2b	32.891	0.975			1.227			1.216
B9EJ86	Oxysterol-binding protein-related protein 8 OS=Mus musculus OX=10090 GN=Osbpl8 PE=1 SV=1	Osbpl8	101.27			1.066			1.195			1.117
Q99LF4	tRNA-splicing ligase RtcB homolog OS=Mus musculus OX=10090 GN=Rtcb PE=1 SV=1	Rtcb	55.249	0.999	0.967	0.988	0.981	0.999	0.983	0.908	0.923	0.935
P51660	Peroxisomal multifunctional enzyme type 2 OS=Mus musculus OX=10090 GN=Hsd17b4 PE=1 SV=3	Hsd17b4	79.481	0.843	0.906	0.892	0.8	0.794	0.824	0.916	0.911	0.871
Q63886	UDP-glucuronosyltransferase 1-1 OS=Mus musculus OX=10090 GN=Ugt1a1 PE=1 SV=2	Ugt1a1	60.047	0.852	0.803	0.827	0.961	0.912	1.011	0.919	0.929	1.058
Q9DCZ4	MICOS complex subunit Mic26 OS=Mus musculus OX=10090 GN=Apoo PE=1 SV=2	Apoo	22.604	0.919	0.933	0.881	0.906	1.027	1.003	0.876	0.997	0.903
Q3UVG3	Protein FAM91A1 OS=Mus musculus OX=10090 GN=Fam91a1 PE=1 SV=1	Fam91a1	93.462	0.974	0.973	0.968	1.066	0.972	0.968	0.981	1.021	0.93
Q8CI08	SLAIN motif-containing protein 2 OS=Mus musculus OX=10090 GN=Slain2 PE=1 SV=2	Slain2	62.377		0.949	0.938		0.945	1.121		1.169	1.396
Q9D0L7	Armadillo repeat-containing protein 10 OS=Mus musculus OX=10090 GN=Armc10 PE=1 SV=1	Armc10	33.31	0.867	0.902	1.006	0.98	1.04	1.066	1.173	0.973	0.951
O35326	Serine/arginine-rich splicing factor 5 OS=Mus musculus OX=10090 GN=Srsf5 PE=1 SV=2	Srsf5	30.891	0.987	0.966	1.017	1.091	0.999	0.945	1.069	1.146	1.035
Q566J8	Atypical kinase COQ8B, mitochondrial OS=Mus musculus OX=10090 GN=Coq8b PE=1 SV=1	Coq8b	59.231	0.881	0.842		1.029	0.972		1.064	1.054
P57759	Endoplasmic reticulum resident protein 29 OS=Mus musculus OX=10090 GN=Erp29 PE=1 SV=2	Erp29	28.823	1.043	1.011	1.076	1.041	1.073	1.07	1.07	1.073	1.044
Q9CQ40	39S ribosomal protein L49, mitochondrial OS=Mus musculus OX=10090 GN=Mrpl49 PE=1 SV=1	Mrpl49	19.133	1.062	0.944	0.927	0.982	0.909	0.981	0.956	0.991	0.956
Q91YR5	Methyltransferase-like protein 13 OS=Mus musculus OX=10090 GN=Mettl13 PE=1 SV=1	Mettl13	78.756	1.068			1.03			1.079
P35279	Ras-related protein Rab-6A OS=Mus musculus OX=10090 GN=Rab6a PE=1 SV=4	Rab6a	23.59	0.977	0.978	0.985	1.124	1.07	1.05	1.055	0.977	1.004
O09030	Interleukin-13 receptor subunit alpha-1 OS=Mus musculus OX=10090 GN=Il13ra1 PE=2 SV=1	Il13ra1	48.402		0.857			0.912			1.272
Q9DAZ9	Abscission/NoCut checkpoint regulator OS=Mus musculus OX=10090 GN=Zfyve19 PE=1 SV=2	Zfyve19	43.272	1.078			1.049			0.875
Q2YDW2	Protein misato homolog 1 OS=Mus musculus OX=10090 GN=Msto1 PE=1 SV=1	Msto1	61.23	0.923	1.025	1.01	1.06	0.916	0.841	1.055	1.144	0.926
Q99N03	Membrane-spanning 4-domains subfamily A member 10 OS=Mus musculus OX=10090 GN=Ms4a10 PE=2 SV=1	Ms4a10	28.971
Q9Z1N9	Protein unc-13 homolog B OS=Mus musculus OX=10090 GN=Unc13b PE=1 SV=2	Unc13b	181.81
Q91WL0	Epidermal growth factor receptor kinase substrate 8-like protein 3 OS=Mus musculus OX=10090 GN=Eps8l3 PE=2 SV=1	Eps8l3	68.215	1.031	1.053	1.027	1.023	0.98	1.036	0.964	0.991	1.046
Q9EP72	ER membrane protein complex subunit 7 OS=Mus musculus OX=10090 GN=Emc7 PE=1 SV=1	Emc7	26.31	1.001	0.98	0.98	1.163	1.184	1.107	1.122	1.114	1.138
Q811I0	ATP synthase mitochondrial F1 complex assembly factor 1 OS=Mus musculus OX=10090 GN=Atpaf1 PE=1 SV=1	Atpaf1	36.354
Q8BUM9	Ubiquitin carboxyl-terminal hydrolase 43 OS=Mus musculus OX=10090 GN=Usp43 PE=1 SV=2	Usp43	123.87		1.039			0.937			1.035
Q64705	Upstream stimulatory factor 2 OS=Mus musculus OX=10090 GN=Usf2 PE=1 SV=1	Usf2	36.953			1.097			1.113			1.364
O55201	Transcription elongation factor SPT5 OS=Mus musculus OX=10090 GN=Supt5h PE=1 SV=1	Supt5h	120.66	0.983	0.994	0.989	1.051	1	1.003	1.011	1.006	1.077
Q921M3	Splicing factor 3B subunit 3 OS=Mus musculus OX=10090 GN=Sf3b3 PE=1 SV=1	Sf3b3	135.55	1.039	1.024	1.023	1.035	1.039	1.044	0.966	1.028	0.975
Q5NC05	Transcription termination factor 2 OS=Mus musculus OX=10090 GN=Ttf2 PE=1 SV=2	Ttf2	125.53		0.963			0.979			0.967
Q8BKN5	Gamma-tubulin complex component 5 OS=Mus musculus OX=10090 GN=Tubgcp5 PE=2 SV=2	Tubgcp5	117.98
Q8VHK1	Caskin-2 OS=Mus musculus OX=10090 GN=Caskin2 PE=1 SV=3	Caskin2	126.78		0.826	0.845		0.914	0.939		1.62	1.364
Q9CQS5	Serine/threonine-protein kinase RIO2 OS=Mus musculus OX=10090 GN=Riok2 PE=1 SV=1	Riok2	62.49	0.832	0.841		0.922	1.044		1.846	1.796
Q61578	NADPH:adrenodoxin oxidoreductase, mitochondrial OS=Mus musculus OX=10090 GN=Fdxr PE=1 SV=1	Fdxr	54.201	0.934	0.99	0.943	0.884	1.082	0.922	0.944	1.119	0.951
P68510	14-3-3 protein eta OS=Mus musculus OX=10090 GN=Ywhah PE=1 SV=2	Ywhah	28.211	1.034	1.03	0.999	0.928	0.899	0.872	0.939	0.904	0.889
P49717	DNA replication licensing factor MCM4 OS=Mus musculus OX=10090 GN=Mcm4 PE=1 SV=1	Mcm4	96.735	1	0.983	1.002	0.981	0.944	0.986	1.027	1.065	1.027
Q99MD6	Thioredoxin reductase 3 OS=Mus musculus OX=10090 GN=Txnrd3 PE=1 SV=3	Txnrd3	71.318
P63028	Translationally-controlled tumor protein OS=Mus musculus OX=10090 GN=Tpt1 PE=1 SV=1	Tpt1	19.462	1.129	1.115	1.014	0.985	0.964	1.011	1.085	0.924	1.009
O35593	26S proteasome non-ATPase regulatory subunit 14 OS=Mus musculus OX=10090 GN=Psmd14 PE=1 SV=2	Psmd14	34.577	1.008	1.022	1.045	1.056	0.995	1.049	0.953	0.984	0.97
Q8CCB4	Vacuolar protein sorting-associated protein 53 homolog OS=Mus musculus OX=10090 GN=Vps53 PE=1 SV=1	Vps53	94.422	1.016	0.903	0.98	0.958	0.98	0.948	1.008	1.458	1.195
Q9WU60	Attractin OS=Mus musculus OX=10090 GN=Atrn PE=1 SV=3	Atrn	158.06
Q62245	Son of sevenless homolog 1 OS=Mus musculus OX=10090 GN=Sos1 PE=1 SV=2	Sos1	150.88	1.025	1.101	1.068	0.986	0.955	0.844	0.921	1.015	0.81
Q99J83	Autophagy protein 5 OS=Mus musculus OX=10090 GN=Atg5 PE=1 SV=1	Atg5	32.402		1.108	1.042		1.406	0.985		1.335	0.958
Q8BX32	Structure-specific endonuclease subunit SLX1 OS=Mus musculus OX=10090 GN=Slx1b PE=2 SV=1	Slx1b	30.656
Q6ZPI3	Ligand-dependent corepressor OS=Mus musculus OX=10090 GN=Lcor PE=2 SV=2	Lcor	47.124			0.974			0.924			0.972
A3KGB4	TBC1 domain family member 8B OS=Mus musculus OX=10090 GN=Tbc1d8b PE=1 SV=1	Tbc1d8b	127.89	0.995	0.988		1.015	1.089		0.979	1.135
O55222	Integrin-linked protein kinase OS=Mus musculus OX=10090 GN=Ilk PE=1 SV=2	Ilk	51.373	0.947	0.98	0.951	1.14	1.051	1.079	0.862	0.972	1.125
Q9DCF9	Translocon-associated protein subunit gamma OS=Mus musculus OX=10090 GN=Ssr3 PE=1 SV=1	Ssr3	21.064	0.613	0.994	0.597	0.897	1.074	0.939	1.888	1.136	1.582
Q62187	Transcription termination factor 1 OS=Mus musculus OX=10090 GN=Ttf1 PE=1 SV=2	Ttf1	97.721
O88271	Craniofacial development protein 1 OS=Mus musculus OX=10090 GN=Cfdp1 PE=1 SV=1	Cfdp1	32.921	1.131	1.05	1.123	0.965	0.912	0.933	1.114	1.008	1.036
A6X919	Probable C-mannosyltransferase DPY19L1 OS=Mus musculus OX=10090 GN=Dpy19l1 PE=1 SV=1	Dpy19l1	84.186
Q9WUU7	Cathepsin Z OS=Mus musculus OX=10090 GN=Ctsz PE=1 SV=1	Ctsz	33.996	0.931	0.966	0.905	1.034	0.989	0.972	0.969	1.001	1.036
Q3U3E2	Protein FAM117B OS=Mus musculus OX=10090 GN=Fam117b PE=1 SV=1	Fam117b	61.344
Q9CQA6	Coiled-coil-helix-coiled-coil-helix domain-containing protein 1 OS=Mus musculus OX=10090 GN=Chchd1 PE=1 SV=1	Chchd1	13.608
O70194	Eukaryotic translation initiation factor 3 subunit D OS=Mus musculus OX=10090 GN=Eif3d PE=1 SV=2	Eif3d	63.988	0.99	1.091	1.062	1.053	1.037	1.098	1.152	1.054	1.071
O88630	Golgi SNAP receptor complex member 1 OS=Mus musculus OX=10090 GN=Gosr1 PE=1 SV=2	Gosr1	28.489	0.959		0.992	1.011		1.106	1.108		1.078
Q9D6H2	Intraflagellar transport protein 25 homolog OS=Mus musculus OX=10090 GN=Hspb11 PE=1 SV=2	Hspb11	16.28			1.015			1.075			1.133
Q9JHI5	Isovaleryl-CoA dehydrogenase, mitochondrial OS=Mus musculus OX=10090 GN=Ivd PE=1 SV=1	Ivd	46.325	0.91	0.99	0.979	0.941	0.999	0.944	0.976	0.986	0.968
P20152	Vimentin OS=Mus musculus OX=10090 GN=Vim PE=1 SV=3	Vim	53.687	1.39	1.235	1.343	1.683	1.586	1.491	1.782	1.696	1.773
Q7TNG5	Echinoderm microtubule-associated protein-like 2 OS=Mus musculus OX=10090 GN=Eml2 PE=1 SV=1	Eml2	70.733	1.073	1.027	1.014	0.918	0.928	0.973	0.981	0.987	0.932
Q60973	Histone-binding protein RBBP7 OS=Mus musculus OX=10090 GN=Rbbp7 PE=1 SV=1	Rbbp7	47.789	1.062	1.071	1.059	1.008	1.048	0.932	1.123	1.094	1.035
Q8BGI5	Peroxisome assembly protein 26 OS=Mus musculus OX=10090 GN=Pex26 PE=1 SV=2	Pex26	34.016	0.965	0.879	1.018	0.918	0.889	0.942	0.97	0.957	0.931
Q8R0X7	Sphingosine-1-phosphate lyase 1 OS=Mus musculus OX=10090 GN=Sgpl1 PE=1 SV=1	Sgpl1	63.676	0.799	0.833	0.835	1.053	1.019	1.012	0.992	1.054	0.983
Q7TMK6	Protein Hook homolog 2 OS=Mus musculus OX=10090 GN=Hook2 PE=1 SV=3	Hook2	83.365	0.975	0.915	0.969	0.996	0.923	0.994	1.148	1.079	1.123
Q9CR95	Adaptin ear-binding coat-associated protein 1 OS=Mus musculus OX=10090 GN=Necap1 PE=1 SV=2	Necap1	29.639	1.018	0.97	1.003	0.866	0.896	0.909	1.035	1.124	0.983
Q91XE9	Cyclic AMP-responsive element-binding protein 3-like protein 3 OS=Mus musculus OX=10090 GN=Creb3l3 PE=2 SV=1	Creb3l3	52.145
Q80UM7	Mannosyl-oligosaccharide glucosidase OS=Mus musculus OX=10090 GN=Mogs PE=1 SV=1	Mogs	91.83	0.987	0.94	0.965	1.074	1.011	1.028	1.045	1.039	1.055
Q9D7S9	Charged multivesicular body protein 5 OS=Mus musculus OX=10090 GN=Chmp5 PE=1 SV=1	Chmp5	24.575	1.072	1.038	1.024	0.964	0.874	1.028	1.156	0.993	1.097
A2AN08	E3 ubiquitin-protein ligase UBR4 OS=Mus musculus OX=10090 GN=Ubr4 PE=1 SV=1	Ubr4	572.28	0.988	1.032	1.005	1.075	1.06	1.053	1.063	1.031	1.063
Q8C8U0	Liprin-beta-1 OS=Mus musculus OX=10090 GN=Ppfibp1 PE=1 SV=3	Ppfibp1	108.54	1.075	1.068	1.079	0.985	1.027	1.096	0.966	0.979	1.149
Q99JH1	Ribonuclease P protein subunit p25-like protein OS=Mus musculus OX=10090 GN=Rpp25l PE=1 SV=1	Rpp25l	17.675		1.048			1.007			0.943
Q7TMY8	E3 ubiquitin-protein ligase HUWE1 OS=Mus musculus OX=10090 GN=Huwe1 PE=1 SV=5	Huwe1	482.63	0.99	0.986	0.991	0.982	0.978	0.97	0.988	1.008	0.95
P62137	Serine/threonine-protein phosphatase PP1-alpha catalytic subunit OS=Mus musculus OX=10090 GN=Ppp1ca PE=1 SV=1	Ppp1ca	37.54	1.072		1.039	0.969		0.921	0.911		0.911
Q8VHE0	Translocation protein SEC63 homolog OS=Mus musculus OX=10090 GN=Sec63 PE=1 SV=4	Sec63	87.869	0.988	0.946	0.93	1.075	1.114	1.152	1.003	0.983	0.924
Q9QZH6	Evolutionarily conserved signaling intermediate in Toll pathway, mitochondrial OS=Mus musculus OX=10090 GN=Ecsit PE=1 SV=2	Ecsit	49.798	0.973	1.059	0.939	1.097	1.305	1.078	0.976	1.169	0.97
Q3URE1	Acyl-CoA synthetase family member 3, mitochondrial OS=Mus musculus OX=10090 GN=Acsf3 PE=1 SV=2	Acsf3	65.076	0.935	0.956	1.02	0.966	1.002	1.08	1.169	1.038	1.151
P58281	Dynamin-like 120 kDa protein, mitochondrial OS=Mus musculus OX=10090 GN=Opa1 PE=1 SV=1	Opa1	111.34	1.013	0.997	0.969	0.986	1.001	1.008	0.899	0.998	0.879
Q56A10	Zinc finger protein 608 OS=Mus musculus OX=10090 GN=Znf608 PE=1 SV=1	Znf608	162.34
Q9DCH4	Eukaryotic translation initiation factor 3 subunit F OS=Mus musculus OX=10090 GN=Eif3f PE=1 SV=2	Eif3f	37.984	1.046	1.098	1.072	1.024	1.012	1.032	1.035	0.993	1.05
Q8K199	COX assembly mitochondrial protein 2 homolog OS=Mus musculus OX=10090 GN=Cmc2 PE=3 SV=1	Cmc2	9.4186
Q9CX86	Heterogeneous nuclear ribonucleoprotein A0 OS=Mus musculus OX=10090 GN=Hnrnpa0 PE=1 SV=1	Hnrnpa0	30.53	1.016	1.082	1.047	0.941	1.286	0.977	0.969	1.131	0.979
P97499	Telomerase protein component 1 OS=Mus musculus OX=10090 GN=Tep1 PE=1 SV=1	Tep1	291.46	1.02	1	0.888	1.084	1.081	1.211	1.03	1.014	1.231
Q91VJ1	Interferon-inducible protein AIM2 OS=Mus musculus OX=10090 GN=Aim2 PE=1 SV=2	Aim2	40.155	1.071			1.251			1.336
Q9CR57	60S ribosomal protein L14 OS=Mus musculus OX=10090 GN=Rpl14 PE=1 SV=3	Rpl14	23.564	0.993	0.961	1.021	1.152	1.118	1.134	1.093	1.039	1.087
O55029	Coatomer subunit beta' OS=Mus musculus OX=10090 GN=Copb2 PE=1 SV=2	Copb2	102.45	0.992	0.987	1.006	0.983	0.992	1.015	0.946	0.951	0.961
Q9JKC8	AP-3 complex subunit mu-1 OS=Mus musculus OX=10090 GN=Ap3m1 PE=1 SV=1	Ap3m1	46.936	1.03	1.025	1.009	1.085	1.079	1.019	1.145	1.011	1.034
Q99J27	Acetyl-coenzyme A transporter 1 OS=Mus musculus OX=10090 GN=Slc33a1 PE=1 SV=1	Slc33a1	61.075	0.946	0.855	0.905	1.119	1.091	1.079	0.994	1.207	1.084
Q3TLI0	Trafficking protein particle complex subunit 10 OS=Mus musculus OX=10090 GN=Trappc10 PE=1 SV=2	Trappc10	141.59		0.961			1.118			1.152
P83882	60S ribosomal protein L36a OS=Mus musculus OX=10090 GN=Rpl36a PE=3 SV=2	Rpl36a	12.441	1.053	1.063	1.022	1.001	1.031	1.023	1.011	0.844	0.901
Q6P1G0	HEAT repeat-containing protein 6 OS=Mus musculus OX=10090 GN=Heatr6 PE=1 SV=1	Heatr6	128.92	1.015	1.066	1.01	1.04	0.994	0.965	1.06	0.986	0.976
Q91VU0	Protein FAM3C OS=Mus musculus OX=10090 GN=Fam3c PE=1 SV=1	Fam3c	24.752	1.044	0.959	0.951	0.998	1.016	1.143	1.138	1.113	1.13
O88685	26S proteasome regulatory subunit 6A OS=Mus musculus OX=10090 GN=Psmc3 PE=1 SV=2	Psmc3	49.548	1.001	1.026	1.04	1.014	0.989	1.001	1.019	0.956	0.972
Q6PDG5	SWI/SNF complex subunit SMARCC2 OS=Mus musculus OX=10090 GN=Smarcc2 PE=1 SV=2	Smarcc2	132.6	0.919	1.066	1.006	0.75	0.941	0.941	0.87	0.851	0.889
Q9Z0F8	Disintegrin and metalloproteinase domain-containing protein 17 OS=Mus musculus OX=10090 GN=Adam17 PE=1 SV=3	Adam17	93.055			0.995			1.066			1.03
Q9R0M6	Ras-related protein Rab-9A OS=Mus musculus OX=10090 GN=Rab9a PE=1 SV=1	Rab9a	22.909	0.865	0.916	0.988	1.028	0.999	1.028	0.942	0.933	0.987
Q7M6Y3	Phosphatidylinositol-binding clathrin assembly protein OS=Mus musculus OX=10090 GN=Picalm PE=1 SV=1	Picalm	71.543	1.086	1.016	0.993	0.838	0.868	0.937	0.831	0.858	0.886
P59708	Splicing factor 3B subunit 6 OS=Mus musculus OX=10090 GN=Sf3b6 PE=1 SV=1	Sf3b6	14.585		0.843			1.026			1.421
Q99JI6	Ras-related protein Rap-1b OS=Mus musculus OX=10090 GN=Rap1b PE=1 SV=2	Rap1b	20.825	1.022	1.083	1.043	1.028	0.992	1.101	0.977	0.998	0.951
Q91WU0	Carboxylesterase 1F OS=Mus musculus OX=10090 GN=Ces1f PE=1 SV=1	Ces1f	61.612	0.869	0.818	0.866	0.831	0.822	0.826	0.884	0.807	0.894
Q5RI75	Ras and EF-hand domain-containing protein homolog OS=Mus musculus OX=10090 GN=Rasef PE=1 SV=1	Rasef	70.751		0.976			0.962			1.085
Q99MJ9	ATP-dependent RNA helicase DDX50 OS=Mus musculus OX=10090 GN=Ddx50 PE=2 SV=1	Ddx50	82.175	1.033	1.004	1.096	0.722	1.041	0.983	1.053	1.035	0.893
Q5SQY2	Biorientation of chromosomes in cell division protein 1 OS=Mus musculus OX=10090 GN=Bod1 PE=3 SV=1	Bod1	18.363
P35294	Ras-related protein Rab-19 OS=Mus musculus OX=10090 GN=Rab19 PE=1 SV=3	Rab19	24.397		0.943			1.244			1.108
P51863	V-type proton ATPase subunit d 1 OS=Mus musculus OX=10090 GN=Atp6v0d1 PE=1 SV=2	Atp6v0d1	40.301	0.875	0.908	0.899	1.132	1.198	1.135	0.99	1.044	1.006
Q9ERE7	LRP chaperone MESD OS=Mus musculus OX=10090 GN=Mesd PE=1 SV=1	Mesd	25.206	1.045	0.966	1.057	0.915	0.844	0.974	0.795	1.6	1.13
Q9D945	Protein LLP homolog OS=Mus musculus OX=10090 GN=Llph PE=1 SV=1	Llph	15.391
Q9D1L9	Ragulator complex protein LAMTOR5 OS=Mus musculus OX=10090 GN=Lamtor5 PE=1 SV=1	Lamtor5	9.6418		1.042	1.014		1.052	0.995		1.036	0.856
Q8K224	RNA cytidine acetyltransferase OS=Mus musculus OX=10090 GN=Nat10 PE=1 SV=1	Nat10	115.42	1.007	1.044	1.025	1.11	1.034	1.113	1.127	1.086	1.107
Q09199	Beta-1,4 N-acetylgalactosaminyltransferase 2 OS=Mus musculus OX=10090 GN=B4galnt2 PE=2 SV=1	B4galnt2	58.317	1.029	1.007	0.965	1.126	1.119	1.091	0.986	1.043	1.052
Q9D8T0	Protein FAM3A OS=Mus musculus OX=10090 GN=Fam3a PE=2 SV=1	Fam3a	25.393		0.944	0.972		1.09	1.032		1.156	1.042
Q9D5V5	Cullin-5 OS=Mus musculus OX=10090 GN=Cul5 PE=1 SV=3	Cul5	90.973	1.062	1.023	1.002	1.04	0.944	1.043	1.049	1.033	1.095
Q8R2Y0	Monoacylglycerol lipase ABHD6 OS=Mus musculus OX=10090 GN=Abhd6 PE=1 SV=1	Abhd6	38.204	1.036	0.997	0.875	1.218	1.145	1.141	1.16	1.186	1.159
Q8JZS9	39S ribosomal protein L48, mitochondrial OS=Mus musculus OX=10090 GN=Mrpl48 PE=1 SV=1	Mrpl48	23.952
Q9D7I5	Phospholysine phosphohistidine inorganic pyrophosphate phosphatase OS=Mus musculus OX=10090 GN=Lhpp PE=1 SV=1	Lhpp	29.144	0.861	0.757	0.971	0.753	0.646	0.758	0.934	0.761	0.874
Q8R4H2	Rho guanine nucleotide exchange factor 12 OS=Mus musculus OX=10090 GN=Arhgef12 PE=1 SV=2	Arhgef12	172.35
Q921H9	Cytochrome c oxidase assembly factor 7 OS=Mus musculus OX=10090 GN=Coa7 PE=1 SV=1	Coa7	25.617	0.936	0.91	0.932	1.042	1.011	0.989	0.954	0.972	0.919
P52912	Nucleolysin TIA-1 OS=Mus musculus OX=10090 GN=Tia1 PE=1 SV=1	Tia1	42.799	1	1.004		0.914	0.951		0.995	1.071
P26883	Peptidyl-prolyl cis-trans isomerase FKBP1A OS=Mus musculus OX=10090 GN=Fkbp1a PE=1 SV=2	Fkbp1a	11.922	1.131	1.076	1.092	0.913	1.007	0.849	0.878	0.837	0.909
Q9QY06	Unconventional myosin-IXb OS=Mus musculus OX=10090 GN=Myo9b PE=1 SV=2	Myo9b	238.83	0.949	1.017	0.966	1.013	0.762	0.96	1.073	0.81	1.125
Q9QVP9	Protein-tyrosine kinase 2-beta OS=Mus musculus OX=10090 GN=Ptk2b PE=1 SV=2	Ptk2b	115.79		1.016	0.93		1.018	1.083		1.083	1.072
P61022	Calcineurin B homologous protein 1 OS=Mus musculus OX=10090 GN=Chp1 PE=1 SV=2	Chp1	22.432	0.926	0.926	0.928	1.322	1.16	1.206	1.066	1.048	1.108
Q8K358	Phosphatidylinositol glycan anchor biosynthesis class U protein OS=Mus musculus OX=10090 GN=Pigu PE=1 SV=4	Pigu	49.804			0.93			1.101			1.056
Q6PDJ1	VWFA and cache domain-containing protein 1 OS=Mus musculus OX=10090 GN=Cachd1 PE=2 SV=1	Cachd1	143.81
Q9DCT6	Chromatin complexes subunit BAP18 OS=Mus musculus OX=10090 GN=Bap18 PE=1 SV=1	Bap18	17.996
Q9D486	C-Maf-inducing protein OS=Mus musculus OX=10090 GN=Cmip PE=1 SV=3	Cmip	86.258	1.109	0.965		1.152	1.036		1.051	1.111
O54956	DNA polymerase epsilon subunit 2 OS=Mus musculus OX=10090 GN=Pole2 PE=2 SV=2	Pole2	59.386			1.011			1.016			1.19
P35230	Regenerating islet-derived protein 3-beta OS=Mus musculus OX=10090 GN=Reg3b PE=1 SV=1	Reg3b	19.476			0.574			0.593			0.659
Q924H2	Mediator of RNA polymerase II transcription subunit 15 OS=Mus musculus OX=10090 GN=Med15 PE=1 SV=3	Med15	86.606		1.09	1.062		1.064	1.055		1.095	1.047
Q8JZU2	Tricarboxylate transport protein, mitochondrial OS=Mus musculus OX=10090 GN=Slc25a1 PE=1 SV=1	Slc25a1	33.931	0.895	0.858	0.82	1.029	1.048	1.036	1	0.923	0.907
Q8R317	Ubiquilin-1 OS=Mus musculus OX=10090 GN=Ubqln1 PE=1 SV=1	Ubqln1	61.976	1.094	1.053	1.134	0.925	0.976	1.307	1.05	0.976	1.067
P21447	Multidrug resistance protein 1A OS=Mus musculus OX=10090 GN=Abcb1a PE=1 SV=3	Abcb1a	140.64	0.991	0.975	0.969	1.149	1.174	1.202	1.146	1.089	1.081
Q9DC71	28S ribosomal protein S15, mitochondrial OS=Mus musculus OX=10090 GN=Mrps15 PE=1 SV=2	Mrps15	29.463	1.02	0.969	0.955	1.028	1.046	1.107	1.083	1.061	1.087
Q66GT5	Phosphatidylglycerophosphatase and protein-tyrosine phosphatase 1 OS=Mus musculus OX=10090 GN=Ptpmt1 PE=1 SV=1	Ptpmt1	21.942	0.961	1.009	0.93	1.236	0.866	1.258	1.109	1.033	1.028
Q8BSQ9	Protein polybromo-1 OS=Mus musculus OX=10090 GN=Pbrm1 PE=1 SV=4	Pbrm1	187.19	1.007	1.048	0.975	1.011	0.953	0.97	0.962	0.89	1.005
Q8CC88	von Willebrand factor A domain-containing protein 8 OS=Mus musculus OX=10090 GN=Vwa8 PE=1 SV=2	Vwa8	213.42	0.964	0.919	0.911	1.013	1.031	1.021	1.138	1.006	0.98
P33215	Protein NEDD1 OS=Mus musculus OX=10090 GN=Nedd1 PE=1 SV=2	Nedd1	71.292		1.048			0.916			1.048
Q9CYR6	Phosphoacetylglucosamine mutase OS=Mus musculus OX=10090 GN=Pgm3 PE=1 SV=1	Pgm3	59.452	1.008	0.946	0.963	0.841	0.869	0.883	0.816	0.972	0.86
Q9CQC7	NADH dehydrogenase [ubiquinone] 1 beta subcomplex subunit 4 OS=Mus musculus OX=10090 GN=Ndufb4 PE=1 SV=3	Ndufb4	15.081	0.971	0.915	1.006	1.011	1.05	1.054	0.853	0.995	1.054
P62301	40S ribosomal protein S13 OS=Mus musculus OX=10090 GN=Rps13 PE=1 SV=2	Rps13	17.222	1.002	1.004	1.007	1.073	1.069	1.099	1.078	1.132	1.079
Q9D8V0	Minor histocompatibility antigen H13 OS=Mus musculus OX=10090 GN=Hm13 PE=1 SV=1	Hm13	41.747	1.019	0.982	0.903	1.212	1.132	1.151	1.046	1.101	1.169
Q3UW53	Protein Niban OS=Mus musculus OX=10090 GN=Fam129a PE=1 SV=2	Fam129a	102.65
Q91ZJ5	UTP--glucose-1-phosphate uridylyltransferase OS=Mus musculus OX=10090 GN=Ugp2 PE=1 SV=3	Ugp2	56.979	0.964	0.957	0.962	0.842	0.847	0.921	0.869	0.797	0.844
Q8K2A8	Dol-P-Man:Man(5)GlcNAc(2)-PP-Dol alpha-1,3-mannosyltransferase OS=Mus musculus OX=10090 GN=Alg3 PE=1 SV=2	Alg3	50.185	0.957	0.955	0.973	1.02	1.107	1.079	1.111	1.148	1.031
P32883	GTPase KRas OS=Mus musculus OX=10090 GN=Kras PE=1 SV=1	Kras	21.656	0.961	0.981	1.13	0.897	0.944	1.003	0.829	0.893	0.928
Q8C407	Protein YIPF4 OS=Mus musculus OX=10090 GN=Yipf4 PE=1 SV=1	Yipf4	27.283
P60521	Gamma-aminobutyric acid receptor-associated protein-like 2 OS=Mus musculus OX=10090 GN=Gabarapl2 PE=1 SV=1	Gabarapl2	13.667	1.009		1.014	1.01		1.087	1.02		1.008
Q9EPK7	Exportin-7 OS=Mus musculus OX=10090 GN=Xpo7 PE=1 SV=3	Xpo7	123.81	0.947	1.001	0.984	0.981	0.939	1.005	0.985	0.934	0.939
Q9CQF0	39S ribosomal protein L11, mitochondrial OS=Mus musculus OX=10090 GN=Mrpl11 PE=1 SV=1	Mrpl11	20.68	0.984	0.981	0.97	1.027	0.983	1.02	1.035	1.011	0.989
Q9DCC4	Pyrroline-5-carboxylate reductase 3 OS=Mus musculus OX=10090 GN=Pycr3 PE=1 SV=2	Pycr3	28.721	0.973	0.913	0.938	1	0.936	0.906	0.925	0.901	0.819
Q505B7	Protein archease OS=Mus musculus OX=10090 GN=Zbtb8os PE=1 SV=2	Zbtb8os	19.727	0.919	1.078	0.972	0.834	0.852	0.776	0.843	0.959	0.864
P53762	Aryl hydrocarbon receptor nuclear translocator OS=Mus musculus OX=10090 GN=Arnt PE=1 SV=3	Arnt	86.962
Q8K190	SAYSvFN domain-containing protein 1 OS=Mus musculus OX=10090 GN=Saysd1 PE=1 SV=1	Saysd1	20.703		0.98	1.102		0.98	0.974		0.971	0.913
P83870	PHD finger-like domain-containing protein 5A OS=Mus musculus OX=10090 GN=Phf5a PE=1 SV=1	Phf5a	12.405	0.994	1.025	0.955	0.996	0.97	1.014	1.024	1.039	1.05
Q9JIX8	Apoptotic chromatin condensation inducer in the nucleus OS=Mus musculus OX=10090 GN=Acin1 PE=1 SV=3	Acin1	150.72	1.059	1.024	1.055	0.862	0.923	0.999	1.008	1.025	1.038
P97770	THUMP domain-containing protein 3 OS=Mus musculus OX=10090 GN=Thumpd3 PE=1 SV=1	Thumpd3	56.431	0.96	0.965	0.953	0.951	0.956	0.979	0.891	0.874	1.016
Q3TC46	Protein PAT1 homolog 1 OS=Mus musculus OX=10090 GN=Patl1 PE=1 SV=2	Patl1	86.769
P46467	Vacuolar protein sorting-associated protein 4B OS=Mus musculus OX=10090 GN=Vps4b PE=1 SV=2	Vps4b	49.419	1.036	1	1.009	1.005	1.057	1.037	0.931	0.996	1.017
Q922V4	Pleiotropic regulator 1 OS=Mus musculus OX=10090 GN=Plrg1 PE=1 SV=1	Plrg1	56.937	1.086	1.052	1.082	0.909	1.025	0.947	0.897	1.096	1.045
Q3V3R1	Monofunctional C1-tetrahydrofolate synthase, mitochondrial OS=Mus musculus OX=10090 GN=Mthfd1l PE=1 SV=2	Mthfd1l	105.73	1.05	1.045	1.031	1.11	1.088	1.098	1.061	1.034	1.038
Q9DBY0	Forkhead box protein P4 OS=Mus musculus OX=10090 GN=Foxp4 PE=1 SV=1	Foxp4	85.98	0.987	1.016		1.107	0.915		1.022	1.089
Q6ZQK5	Arf-GAP with coiled-coil, ANK repeat and PH domain-containing protein 2 OS=Mus musculus OX=10090 GN=Acap2 PE=1 SV=2	Acap2	87.21		1.069			1.041			1.051
Q9DCD6	Gamma-aminobutyric acid receptor-associated protein OS=Mus musculus OX=10090 GN=Gabarap PE=1 SV=2	Gabarap	13.918		0.961	0.999		0.935	0.941		0.855	0.965
Q925G2	Cytochrome b reductase 1 OS=Mus musculus OX=10090 GN=Cybrd1 PE=1 SV=2	Cybrd1	31.843		0.868	0.981		0.85	0.809		0.81	0.82
Q8BFR5	Elongation factor Tu, mitochondrial OS=Mus musculus OX=10090 GN=Tufm PE=1 SV=1	Tufm	49.508	0.929	0.932	0.937	1.053	1.056	1.044	1.01	0.991	0.996
P58058	NAD kinase OS=Mus musculus OX=10090 GN=Nadk PE=1 SV=2	Nadk	48.597		1.03	1.08		1.006	1.007		0.994	0.919
Q9D1K7	UPF0687 protein C20orf27 homolog OS=Mus musculus OX=10090 PE=1 SV=3	---	19.476
Q6DI86	FAST kinase domain-containing protein 1, mitochondrial OS=Mus musculus OX=10090 GN=Fastkd1 PE=2 SV=1	Fastkd1	95.397
Q8QZS3	Folliculin OS=Mus musculus OX=10090 GN=Flcn PE=1 SV=1	Flcn	64.327
Q8C5K5	Uncharacterized protein CXorf38 homolog OS=Mus musculus OX=10090 PE=1 SV=1	---	36.588			1.008			1.084			1.059
O88958	Glucosamine-6-phosphate isomerase 1 OS=Mus musculus OX=10090 GN=Gnpda1 PE=1 SV=3	Gnpda1	32.549	0.834	0.868	0.962	0.831	0.797	0.951	0.858	0.923	0.929
Q505D7	Optic atrophy 3 protein homolog OS=Mus musculus OX=10090 GN=Opa3 PE=1 SV=1	Opa3	20.11	1.018			1.068			1.215
P97313	DNA-dependent protein kinase catalytic subunit OS=Mus musculus OX=10090 GN=Prkdc PE=1 SV=3	Prkdc	471.47	0.877		0.869	0.762		0.867	0.918		0.933
Q64523	Histone H2A type 2-C OS=Mus musculus OX=10090 GN=Hist2h2ac PE=1 SV=3	Hist2h2ac	13.988		1.152	1.149		1.475	1.678		1.23	1.282
Q91WE1	Sorting nexin-15 OS=Mus musculus OX=10090 GN=Snx15 PE=1 SV=1	Snx15	37.742	0.973	0.882	0.969	1.085	0.958	0.956	1.001	1.122	1.017
Q9DC37	Major facilitator superfamily domain-containing protein 1 OS=Mus musculus OX=10090 GN=Mfsd1 PE=1 SV=1	Mfsd1	51.396		1.009			1.165			1.06
Q5XJE5	RNA polymerase-associated protein LEO1 OS=Mus musculus OX=10090 GN=Leo1 PE=1 SV=2	Leo1	75.596	1.064	1.037	1.089	1.037	1.101	1.221	1.11	1.076	1.169
P63242	Eukaryotic translation initiation factor 5A-1 OS=Mus musculus OX=10090 GN=Eif5a PE=1 SV=2	Eif5a	16.832	1.015	1.022	1.01	0.888	0.884	0.864	0.867	0.845	0.837
Q80U72	Protein scribble homolog OS=Mus musculus OX=10090 GN=Scrib PE=1 SV=2	Scrib	174.06	0.988	1.006	1.055	0.936	1.008	1.003	0.919	1.02	1.032
Q3UJD6	Ubiquitin carboxyl-terminal hydrolase 19 OS=Mus musculus OX=10090 GN=Usp19 PE=1 SV=1	Usp19	150.55	1.122	1.048	1.043	0.975	1.001	1.111	1.078	1.032	1.056
Q8BIX3	ARL14 effector protein OS=Mus musculus OX=10090 GN=Arl14ep PE=1 SV=1	Arl14ep	31.01			0.966			1.27			1.122
Q9D289	Trafficking protein particle complex subunit 6B OS=Mus musculus OX=10090 GN=Trappc6b PE=1 SV=1	Trappc6b	17.936			0.933			1.05			1.108
Q9R0E2	Procollagen-lysine,2-oxoglutarate 5-dioxygenase 1 OS=Mus musculus OX=10090 GN=Plod1 PE=1 SV=1	Plod1	83.594	1.098			1.524			1.735
Q8CEI1	BolA-like protein 3 OS=Mus musculus OX=10090 GN=Bola3 PE=1 SV=1	Bola3	12.228
Q69ZP3	Probable hydrolase PNKD OS=Mus musculus OX=10090 GN=Pnkd PE=1 SV=2	Pnkd	43.016		0.935			0.944			0.932
Q62095	ATP-dependent RNA helicase DDX3Y OS=Mus musculus OX=10090 GN=Ddx3y PE=1 SV=2	Ddx3y	73.427	1.01	1.003		1.338	1.16		1.021	1.194
O88696	ATP-dependent Clp protease proteolytic subunit, mitochondrial OS=Mus musculus OX=10090 GN=Clpp PE=1 SV=1	Clpp	29.8	0.974	0.953	1.002	0.907	0.943	1.01	1.024	0.941	0.969
Q9QXV1	Chromobox protein homolog 8 OS=Mus musculus OX=10090 GN=Cbx8 PE=1 SV=1	Cbx8	39.859
Q8VEH8	Endoplasmic reticulum lectin 1 OS=Mus musculus OX=10090 GN=Erlec1 PE=1 SV=1	Erlec1	54.906	0.988	0.94	0.916	0.93	1.067	0.964	1.028	1.086	1.182
Q9WTK2	Chromodomain Y-like protein OS=Mus musculus OX=10090 GN=Cdyl PE=1 SV=1	Cdyl	65.21	1.089			1.025			0.989
Q91YP0	L-2-hydroxyglutarate dehydrogenase, mitochondrial OS=Mus musculus OX=10090 GN=L2hgdh PE=1 SV=1	L2hgdh	50.898	0.877	1.104	0.935	1.052	0.967	1.118	0.978	1.143	1.075
D3Z4I3	RNA-binding protein 24 OS=Mus musculus OX=10090 GN=Rbm24 PE=1 SV=1	Rbm24	24.822
Q9JJA4	Ribosome biogenesis protein WDR12 OS=Mus musculus OX=10090 GN=Wdr12 PE=1 SV=1	Wdr12	47.346	1.058	1.044	1.039	1.165	1.148	1.172	1.066	1.143	1.026
Q78HU3	Multivesicular body subunit 12A OS=Mus musculus OX=10090 GN=Mvb12a PE=1 SV=1	Mvb12a	28.705			1.02			1.08			0.862
Q9QYB2	Dachshund homolog 1 OS=Mus musculus OX=10090 GN=Dach1 PE=1 SV=1	Dach1	77.971		1.096			1.074			1.292
Q8R050	Eukaryotic peptide chain release factor GTP-binding subunit ERF3A OS=Mus musculus OX=10090 GN=Gspt1 PE=1 SV=2	Gspt1	68.625	0.99	0.997	0.991	0.999	0.996	0.975	0.997	0.975	1.012
Q9JKF1	Ras GTPase-activating-like protein IQGAP1 OS=Mus musculus OX=10090 GN=Iqgap1 PE=1 SV=2	Iqgap1	188.74	1.042	1.03	1.055	1.006	0.988	0.996	0.959	0.975	0.958
Q8K2I4	Beta-mannosidase OS=Mus musculus OX=10090 GN=Manba PE=1 SV=1	Manba	100.83	1.066	1.021		0.883	0.897		1.001	1.073
P56677	Suppressor of tumorigenicity 14 protein homolog OS=Mus musculus OX=10090 GN=St14 PE=1 SV=2	St14	94.654	1.173	1.129	1.109	1.065	1.035	1.071	1.09	1.067	1.05
P15208	Insulin receptor OS=Mus musculus OX=10090 GN=Insr PE=1 SV=2	Insr	155.61			1.002			0.973			1.124
Q9WUR2	Enoyl-CoA delta isomerase 2, mitochondrial OS=Mus musculus OX=10090 GN=Eci2 PE=1 SV=2	Eci2	43.267	0.97	0.944	0.991	0.852	0.915	0.877	0.935	0.981	0.974
P54731	FAS-associated factor 1 OS=Mus musculus OX=10090 GN=Faf1 PE=1 SV=2	Faf1	73.862	1.045	1.039	1.05	1	0.919	0.979	1.054	1.008	0.982
Q9CXT7	Transmembrane protein 192 OS=Mus musculus OX=10090 GN=Tmem192 PE=1 SV=1	Tmem192	30.335
Q922X9	Protein arginine N-methyltransferase 7 OS=Mus musculus OX=10090 GN=Prmt7 PE=1 SV=1	Prmt7	78.3		0.926	1.112		0.942	0.878		1.304	1.047
Q8BMK5	Coiled-coil domain-containing protein 184 OS=Mus musculus OX=10090 GN=Ccdc184 PE=2 SV=1	Ccdc184	20.184	0.962	0.946	0.971	1.024	0.922	1.018	0.873	0.967	0.981
Q9CX56	26S proteasome non-ATPase regulatory subunit 8 OS=Mus musculus OX=10090 GN=Psmd8 PE=1 SV=2	Psmd8	39.93	1.064	1.006	1.009	1.158	1.086	1.031	1.095	1.118	0.985
Q8BMK4	Cytoskeleton-associated protein 4 OS=Mus musculus OX=10090 GN=Ckap4 PE=1 SV=2	Ckap4	63.691		1.014			1.613			1.708
Q8BKU8	Transmembrane protein 87B OS=Mus musculus OX=10090 GN=Tmem87b PE=2 SV=1	Tmem87b	62.898	0.963	0.98		1.049	1.128		1.138	1.131
Q8R086	Sulfite oxidase, mitochondrial OS=Mus musculus OX=10090 GN=Suox PE=1 SV=2	Suox	60.755	0.988	1.033	1.026	1.032	1.007	1.195	1.001	1.006	1.041
Q3TL26	Dimethyladenosine transferase 2, mitochondrial OS=Mus musculus OX=10090 GN=Tfb2m PE=2 SV=1	Tfb2m	45.863
Q9CZJ6	Protein Mis18-alpha OS=Mus musculus OX=10090 GN=Mis18a PE=2 SV=1	Mis18a	22.949
Q9QWK5	Baculoviral IAP repeat-containing protein 1a OS=Mus musculus OX=10090 GN=Naip1 PE=2 SV=3	Naip1	158.72
Q91YL3	Uridine-cytidine kinase-like 1 OS=Mus musculus OX=10090 GN=Uckl1 PE=1 SV=1	Uckl1	60.841	0.986	0.928	0.919	1.122	1.028	0.994	0.982	1.021	1.018
Q8K072	Receptor expression-enhancing protein 4 OS=Mus musculus OX=10090 GN=Reep4 PE=1 SV=1	Reep4	29.69		0.874	0.862		1.069	1.003		1.196	1.287
Q8VDI7	Ubiquitin-associated domain-containing protein 1 OS=Mus musculus OX=10090 GN=Ubac1 PE=1 SV=2	Ubac1	45.53
Q9D136	2-oxoglutarate and iron-dependent oxygenase domain-containing protein 3 OS=Mus musculus OX=10090 GN=Ogfod3 PE=2 SV=1	Ogfod3	35.384	0.796	0.875	0.923	1.103	1.135	1.064	1.584	1.201	1.26
Q80US4	Actin-related protein 5 OS=Mus musculus OX=10090 GN=Actr5 PE=1 SV=3	Actr5	67.844
Q9CQ36	DNA polymerase epsilon subunit 4 OS=Mus musculus OX=10090 GN=Pole4 PE=1 SV=1	Pole4	12.24	1.149	1.042	1.084	0.946	1.091	1.048	1.231	1.133	1.269
Q69ZQ1	Myogenesis-regulating glycosidase OS=Mus musculus OX=10090 GN=Myorg PE=1 SV=2	Myorg	81.361	0.949	1.016		1.04	1.048		0.955	1.018
Q8VBV3	Exosome complex component RRP4 OS=Mus musculus OX=10090 GN=Exosc2 PE=1 SV=1	Exosc2	32.631		1.005	1.052		1.06	0.986		1.07	1.035
Q5EG47	5'-AMP-activated protein kinase catalytic subunit alpha-1 OS=Mus musculus OX=10090 GN=Prkaa1 PE=1 SV=2	Prkaa1	63.928	1.043	1.029	1.063	1.054	1.078	1.118	0.988	1.031	1.063
Q99M28	RNA-binding protein with serine-rich domain 1 OS=Mus musculus OX=10090 GN=Rnps1 PE=1 SV=1	Rnps1	34.208	1.03		1.19	1.075		1.329	0.982		1.434
Q9QXW9	Large neutral amino acids transporter small subunit 2 OS=Mus musculus OX=10090 GN=Slc7a8 PE=1 SV=1	Slc7a8	57.872		0.874	0.772		1.029	0.924		1.044	0.945
Q91VR8	Protein BRICK1 OS=Mus musculus OX=10090 GN=Brk1 PE=1 SV=1	Brk1	8.7608	0.998	0.955	0.923	1.036	1.063	0.942	0.837	0.974	0.896
Q99LG4	Tetratricopeptide repeat protein 5 OS=Mus musculus OX=10090 GN=Ttc5 PE=1 SV=2	Ttc5	48.795
Q9D1C8	Vacuolar protein sorting-associated protein 28 homolog OS=Mus musculus OX=10090 GN=Vps28 PE=1 SV=1	Vps28	25.452	0.989	1.078	0.99	1.089	1.063	1.115	0.87	1.016	1.052
Q91WK1	SPRY domain-containing protein 4 OS=Mus musculus OX=10090 GN=Spryd4 PE=1 SV=1	Spryd4	23.275
Q9CXI0	2-methoxy-6-polyprenyl-1,4-benzoquinol methylase, mitochondrial OS=Mus musculus OX=10090 GN=Coq5 PE=1 SV=2	Coq5	37.335	0.956	1.046	0.954	1.096	1.169	0.935	0.919	1.171	1.02
Q9EQS3	c-Myc-binding protein OS=Mus musculus OX=10090 GN=Mycbp PE=1 SV=5	Mycbp	11.97		1.102	1.01		0.969	1.006		0.806	0.894
Q8C7U1	NEDD4-binding protein 3 OS=Mus musculus OX=10090 GN=N4bp3 PE=1 SV=1	N4bp3	60.042			1.211			1.386			1.149
B8ZXI1	Queuine tRNA-ribosyltransferase accessory subunit 2 OS=Mus musculus OX=10090 GN=Qtrt2 PE=1 SV=2	Qtrt2	46.288	0.93	1.028	1.023	0.923	1.08	1.056	1.061	1.164	1.012
P26369	Splicing factor U2AF 65 kDa subunit OS=Mus musculus OX=10090 GN=U2af2 PE=1 SV=3	U2af2	53.516	1.021	1.027	1.032	0.911	0.87	0.968	0.959	0.898	0.962
D3YXK1	Atherin OS=Mus musculus OX=10090 GN=Samd1 PE=1 SV=1	Samd1	54.532	0.946	1.049		1.206	1.177		1.544	1.195
Q91WQ5	TAF5-like RNA polymerase II p300/CBP-associated factor-associated factor 65 kDa subunit 5L OS=Mus musculus OX=10090 GN=Taf5l PE=2 SV=1	Taf5l	65.91
Q6PAQ4	RNA exonuclease 4 OS=Mus musculus OX=10090 GN=Rexo4 PE=2 SV=2	Rexo4	47.598	1.116	1.035	1.098	1.051	1.052	1.012	1.105	1.153	1.177
Q64277	ADP-ribosyl cyclase/cyclic ADP-ribose hydrolase 2 OS=Mus musculus OX=10090 GN=Bst1 PE=1 SV=1	Bst1	34.616
O88974	Histone-lysine N-methyltransferase SETDB1 OS=Mus musculus OX=10090 GN=Setdb1 PE=1 SV=1	Setdb1	144.55			1.02			0.98			1.084
Q9CUX1	52 kDa repressor of the inhibitor of the protein kinase OS=Mus musculus OX=10090 GN=Thap12 PE=2 SV=2	Thap12	87.02
Q9CPV5	Polyamine-modulated factor 1 OS=Mus musculus OX=10090 GN=Pmf1 PE=1 SV=1	Pmf1	23.121			1.061			1.028			1.026
Q9DC28	Casein kinase I isoform delta OS=Mus musculus OX=10090 GN=Csnk1d PE=1 SV=2	Csnk1d	47.316	0.956		1.062	1.198		1.044	1.194		1.219
Q8VHG0	Dimethylaniline monooxygenase [N-oxide-forming] 4 OS=Mus musculus OX=10090 GN=Fmo4 PE=1 SV=3	Fmo4	63.791	0.784	0.685	0.808	1.007	1	1.016	0.999	0.988	0.901
Q3UDK1	TRAF-type zinc finger domain-containing protein 1 OS=Mus musculus OX=10090 GN=Trafd1 PE=1 SV=1	Trafd1	64.282	0.979		0.864	0.962		0.761	1.166		1.222
D3YXK2	Scaffold attachment factor B1 OS=Mus musculus OX=10090 GN=Safb PE=1 SV=2	Safb	105.1	1.093	1.014	1.03	1.025	0.985	0.991	1.074	0.968	1.01
Q6P069	Sorcin OS=Mus musculus OX=10090 GN=Sri PE=1 SV=1	Sri	21.627	0.988	0.976	0.982	0.976	1.024	1.038	0.975	0.877	0.919
Q8K0V4	CCR4-NOT transcription complex subunit 3 OS=Mus musculus OX=10090 GN=Cnot3 PE=1 SV=1	Cnot3	81.945	1.144	0.938	0.975	0.889	0.957	0.876	0.882	1.056	0.923
Q8BL06	Inactive ubiquitin carboxyl-terminal hydrolase 54 OS=Mus musculus OX=10090 GN=Usp54 PE=1 SV=2	Usp54	176.66		1.116			0.989			1.084
P29341	Polyadenylate-binding protein 1 OS=Mus musculus OX=10090 GN=Pabpc1 PE=1 SV=2	Pabpc1	70.67	1.078	1.055	1.062	0.978	0.975	0.996	1.027	0.988	1.047
Q9D2V8	Major facilitator superfamily domain-containing protein 10 OS=Mus musculus OX=10090 GN=Mfsd10 PE=1 SV=1	Mfsd10	49.369	0.951		1.024	0.98		1.138	1.05		1.104
P13705	DNA mismatch repair protein Msh3 OS=Mus musculus OX=10090 GN=Msh3 PE=2 SV=3	Msh3	123.07	1.007	1.066	0.995	0.846	0.694	0.87	1.018	0.993	0.939
P97863	Nuclear factor 1 B-type OS=Mus musculus OX=10090 GN=Nfib PE=1 SV=2	Nfib	63.506	0.95	0.986	0.991	0.904	0.876	0.944	0.895	1.074	0.895
P63005	Platelet-activating factor acetylhydrolase IB subunit alpha OS=Mus musculus OX=10090 GN=Pafah1b1 PE=1 SV=2	Pafah1b1	46.67	1.037	0.985	0.991	0.957	0.959	0.966	0.856	0.899	0.84
Q9D6K9	Ceramide synthase 5 OS=Mus musculus OX=10090 GN=Cers5 PE=1 SV=1	Cers5	48.166			1.034			1.304			1.318
O88569	Heterogeneous nuclear ribonucleoproteins A2/B1 OS=Mus musculus OX=10090 GN=Hnrnpa2b1 PE=1 SV=2	Hnrnpa2b1	37.402	0.997	1.033	1.016	0.889	0.856	0.877	0.942	0.96	0.981
Q91VH2	Sorting nexin-9 OS=Mus musculus OX=10090 GN=Snx9 PE=1 SV=1	Snx9	66.545	0.934	0.958	0.978	0.962	0.949	0.832	0.924	0.925	0.906
Q99KV1	DnaJ homolog subfamily B member 11 OS=Mus musculus OX=10090 GN=Dnajb11 PE=1 SV=1	Dnajb11	40.555	0.932	0.926	0.982	1.224	1.209	1.233	1.239	1.199	1.181
Q8C3K6	Sodium/glucose cotransporter 1 OS=Mus musculus OX=10090 GN=Slc5a1 PE=1 SV=1	Slc5a1	73.448	0.814	0.797	0.818	0.807	0.886	0.823	0.755	0.756	0.732
Q3U2C5	E3 ubiquitin-protein ligase RNF149 OS=Mus musculus OX=10090 GN=Rnf149 PE=1 SV=3	Rnf149	42.552
Q9D273	Cob(I)yrinic acid a,c-diamide adenosyltransferase, mitochondrial OS=Mus musculus OX=10090 GN=Mmab PE=1 SV=1	Mmab	26.273			0.827			0.82			1.104
Q9Z179	SHC SH2 domain-binding protein 1 OS=Mus musculus OX=10090 GN=Shcbp1 PE=1 SV=1	Shcbp1	75.916		1.093			1.058			1.186
Q62388	Serine-protein kinase ATM OS=Mus musculus OX=10090 GN=Atm PE=1 SV=2	Atm	349.41	1.239	1.437	1.345	1.351	1.501	1.444	1.67	2.252	1.814
Q9CQK7	RWD domain-containing protein 1 OS=Mus musculus OX=10090 GN=Rwdd1 PE=1 SV=1	Rwdd1	27.785	1.03	1.083	1.027	0.934	0.881	0.956	0.969	0.91	0.953
P97864	Caspase-7 OS=Mus musculus OX=10090 GN=Casp7 PE=1 SV=2	Casp7	34.06	0.977	1.015	0.981	0.945	0.853	0.954	1.023	0.926	0.954
P21981	Protein-glutamine gamma-glutamyltransferase 2 OS=Mus musculus OX=10090 GN=Tgm2 PE=1 SV=4	Tgm2	77.06	0.945	0.946	0.93	0.964	0.899	0.95	0.899	0.902	0.814
Q6P5D8	Structural maintenance of chromosomes flexible hinge domain-containing protein 1 OS=Mus musculus OX=10090 GN=Smchd1 PE=1 SV=2	Smchd1	225.65	1.038	1.026	1.021	1.07	1.092	1.042	1.073	1.045	1.131
Q8BFR6	AN1-type zinc finger protein 1 OS=Mus musculus OX=10090 GN=Zfand1 PE=1 SV=1	Zfand1	30.202		1.068			0.812			1.043
P12367	cAMP-dependent protein kinase type II-alpha regulatory subunit OS=Mus musculus OX=10090 GN=Prkar2a PE=1 SV=2	Prkar2a	45.389	1.013	0.972	0.987	0.97	1.036	1.009	0.945	1.01	0.988
D3Z7P3	Glutaminase kidney isoform, mitochondrial OS=Mus musculus OX=10090 GN=Gls PE=1 SV=1	Gls	73.963	0.882	0.838	0.889	1.007	0.992	1.012	1.005	0.963	1.032
Q9CXK8	60S ribosome subunit biogenesis protein NIP7 homolog OS=Mus musculus OX=10090 GN=Nip7 PE=1 SV=1	Nip7	20.451	1.064	1.022	1.049	1.119	1.121	1.106	1.142	1.319	1.064
Q91X52	L-xylulose reductase OS=Mus musculus OX=10090 GN=Dcxr PE=1 SV=2	Dcxr	25.746	0.98	0.999	0.892	0.943	1.148	0.842	0.98	0.994	0.999
Q8K2C9	Very-long-chain (3R)-3-hydroxyacyl-CoA dehydratase 3 OS=Mus musculus OX=10090 GN=Hacd3 PE=1 SV=2	Hacd3	43.131	0.854	0.883	0.879	1.11	1.183	1.135	1.19	1.268	1.15
A2AKB4	FERM and PDZ domain-containing protein 1 OS=Mus musculus OX=10090 GN=Frmpd1 PE=1 SV=1	Frmpd1	169.21		1.035	0.911		0.947	0.95		0.98	1.008
P45952	Medium-chain specific acyl-CoA dehydrogenase, mitochondrial OS=Mus musculus OX=10090 GN=Acadm PE=1 SV=1	Acadm	46.481	0.883	0.813	0.836	1.003	0.958	0.997	0.972	1.003	1.036
A2A5R2	Brefeldin A-inhibited guanine nucleotide-exchange protein 2 OS=Mus musculus OX=10090 GN=Arfgef2 PE=1 SV=1	Arfgef2	202.24	0.951	0.942	0.984	1.002	1.123	1.018	1.029	1.026	0.996
Q80VP0	Tectonin beta-propeller repeat-containing protein 1 OS=Mus musculus OX=10090 GN=Tecpr1 PE=1 SV=1	Tecpr1	130.26	0.892		0.949	0.849		1.676	0.796		1.206
Q9D1Q6	Endoplasmic reticulum resident protein 44 OS=Mus musculus OX=10090 GN=Erp44 PE=1 SV=1	Erp44	46.852	1.004	0.978	1.007	1.032	1.067	1.044	1.048	1.005	0.952
Q9EP71	Ankycorbin OS=Mus musculus OX=10090 GN=Rai14 PE=1 SV=1	Rai14	108.85
Q99LI7	Cleavage stimulation factor subunit 3 OS=Mus musculus OX=10090 GN=Cstf3 PE=1 SV=1	Cstf3	82.876	1.033	1.017	0.954	1.145	0.934	1.075	1.114	0.988	1.199
Q9QYA2	Mitochondrial import receptor subunit TOM40 homolog OS=Mus musculus OX=10090 GN=Tomm40 PE=1 SV=3	Tomm40	37.895	0.946	0.966	0.923	1.125	1.111	1.137	1.064	1.132	1.117
Q8BML1	[F-actin]-monooxygenase MICAL2 OS=Mus musculus OX=10090 GN=Mical2 PE=1 SV=1	Mical2	110.07		1.339			0.684			1.486
Q9R020	Zinc finger Ran-binding domain-containing protein 2 OS=Mus musculus OX=10090 GN=Zranb2 PE=1 SV=2	Zranb2	37.35	1.036	0.983	1.075	1.005	1.051	0.909	0.916	0.941	0.905
Q8CIG9	F-box/LRR-repeat protein 8 OS=Mus musculus OX=10090 GN=Fbxl8 PE=1 SV=1	Fbxl8	41.144		1.006			0.967			1.017
Q91X72	Hemopexin OS=Mus musculus OX=10090 GN=Hpx PE=1 SV=2	Hpx	51.317
Q9JM52	Misshapen-like kinase 1 OS=Mus musculus OX=10090 GN=Mink1 PE=1 SV=3	Mink1	147.29		0.789	0.945		1.14	0.964		1.413	1.471
Q9Z2D8	Methyl-CpG-binding domain protein 3 OS=Mus musculus OX=10090 GN=Mbd3 PE=1 SV=1	Mbd3	32.168			1.089			0.981			1.032
Q6NVD0	FRAS1-related extracellular matrix protein 2 OS=Mus musculus OX=10090 GN=Frem2 PE=1 SV=2	Frem2	350.64
Q3UI43	BRISC and BRCA1-A complex member 1 OS=Mus musculus OX=10090 GN=Babam1 PE=1 SV=1	Babam1	36.793	1.034		1.001	0.83		0.965	0.904		1.014
Q80XI4	Phosphatidylinositol 5-phosphate 4-kinase type-2 beta OS=Mus musculus OX=10090 GN=Pip4k2b PE=1 SV=1	Pip4k2b	47.318			0.941			1.29			1.475
Q8BHN5	RNA-binding protein 45 OS=Mus musculus OX=10090 GN=Rbm45 PE=1 SV=1	Rbm45	53.324
Q2NL51	Glycogen synthase kinase-3 alpha OS=Mus musculus OX=10090 GN=Gsk3a PE=1 SV=2	Gsk3a	51.66	0.92	1.006	1.131	1.178	1.124	0.884	0.94	1.004	1.205
Q61035	Histidine--tRNA ligase, cytoplasmic OS=Mus musculus OX=10090 GN=Hars PE=1 SV=2	Hars	57.432	0.905	1.077	1.074	0.855	0.906	0.921	1.216	1.026	0.993
Q9JIL4	Na(+)/H(+) exchange regulatory cofactor NHE-RF3 OS=Mus musculus OX=10090 GN=Pdzk1 PE=1 SV=1	Pdzk1	56.498	0.773	0.882		0.745	0.832		0.794	1.102
Q62086	Serum paraoxonase/arylesterase 2 OS=Mus musculus OX=10090 GN=Pon2 PE=1 SV=2	Pon2	39.617	1.001	0.957	0.961	1.148	1.069	1.136	0.972	1.025	0.953
O08539	Myc box-dependent-interacting protein 1 OS=Mus musculus OX=10090 GN=Bin1 PE=1 SV=1	Bin1	64.469			1.096			1.257			1.307
Q8BHH8	Clarin-3 OS=Mus musculus OX=10090 GN=Clrn3 PE=1 SV=1	Clrn3	25.35	0.914	0.943	0.88	1.024	0.997	0.985	0.875	1.043	0.872
Q923D4	Splicing factor 3B subunit 5 OS=Mus musculus OX=10090 GN=Sf3b5 PE=1 SV=1	Sf3b5	10.119	1.068	1.056	1.023	0.998	0.997	1.037	0.975	1.009	1.11
Q9DCA5	Ribosome biogenesis protein BRX1 homolog OS=Mus musculus OX=10090 GN=Brix1 PE=1 SV=3	Brix1	41.241	0.931	1.007	1.061	1.03	1.114	1.079	1.085	1.235	1.16
P47955	60S acidic ribosomal protein P1 OS=Mus musculus OX=10090 GN=Rplp1 PE=1 SV=1	Rplp1	11.475	1.038	0.904	1.064	0.961	1.127	0.973	1.012	1.02	0.941
O54879	High mobility group protein B3 OS=Mus musculus OX=10090 GN=Hmgb3 PE=1 SV=3	Hmgb3	23.01	1.015	0.969	0.969	0.8	0.8	0.799	0.869	0.806	0.849
P70380	Interleukin-18 OS=Mus musculus OX=10090 GN=Il18 PE=1 SV=2	Il18	22.135
Q9CPZ8	COX assembly mitochondrial protein homolog OS=Mus musculus OX=10090 GN=Cmc1 PE=1 SV=1	Cmc1	12.552		1.029			0.994			0.974
Q8BHX3	Borealin OS=Mus musculus OX=10090 GN=Cdca8 PE=1 SV=2	Cdca8	32.214	1.144	1.122		0.977	0.973		1.127	0.95
Q921G7	Electron transfer flavoprotein-ubiquinone oxidoreductase, mitochondrial OS=Mus musculus OX=10090 GN=Etfdh PE=1 SV=1	Etfdh	68.09	0.853	0.863	0.834	1.039	1.043	1.053	0.986	0.977	1.023
Q8BYP3	Rho-related GTP-binding protein RhoF OS=Mus musculus OX=10090 GN=Rhof PE=1 SV=1	Rhof	23.577		0.971			1.113			1.168
Q9ERG2	Striatin-3 OS=Mus musculus OX=10090 GN=Strn3 PE=1 SV=1	Strn3	87.149	1.093		1.022	0.904		1.082	1.037		1.024
P60335	Poly(rC)-binding protein 1 OS=Mus musculus OX=10090 GN=Pcbp1 PE=1 SV=1	Pcbp1	37.497	0.98	1.018	1.004	0.955	0.974	0.936	0.974	0.955	1.025
Q80W47	WD repeat domain phosphoinositide-interacting protein 2 OS=Mus musculus OX=10090 GN=Wipi2 PE=1 SV=1	Wipi2	48.477	0.94	1.025	0.952	1.097	1.052	1.019	1.085	1.038	0.895
Q00547	Hyaluronan mediated motility receptor OS=Mus musculus OX=10090 GN=Hmmr PE=1 SV=4	Hmmr	91.784	1.111	1.167	1.242	1.215	1.239	1.197	1.317	1.229	1.222
Q9CQX8	28S ribosomal protein S36, mitochondrial OS=Mus musculus OX=10090 GN=Mrps36 PE=1 SV=1	Mrps36	11.101	1.006	1.046		0.829	0.843		0.987	0.907
Q2KN98	Cytospin-A OS=Mus musculus OX=10090 GN=Specc1l PE=1 SV=1	Specc1l	124.49		0.974			1.033			1.081
Q8R0K4	Coiled-coil domain-containing protein 137 OS=Mus musculus OX=10090 GN=Ccdc137 PE=2 SV=1	Ccdc137	32.918	1.133	1.026	1.095	1.069	0.904	1.059	1.163	1.289	1.179
Q61194	Phosphatidylinositol 4-phosphate 3-kinase C2 domain-containing subunit alpha OS=Mus musculus OX=10090 GN=Pik3c2a PE=1 SV=2	Pik3c2a	190.76	0.936	0.898	0.843	1.059	1.006	1.164	0.959	0.942	1.179
P17047	Lysosome-associated membrane glycoprotein 2 OS=Mus musculus OX=10090 GN=Lamp2 PE=1 SV=2	Lamp2	45.681	1	0.927	0.965	0.95	0.85	0.983	0.822	0.828	1.122
Q8K248	4-hydroxyphenylpyruvate dioxygenase-like protein OS=Mus musculus OX=10090 GN=Hpdl PE=2 SV=1	Hpdl	39.909	1.055	1.1	1.095	1.005	1.061	1.008	1.104	1.188	1.111
P24549	Retinal dehydrogenase 1 OS=Mus musculus OX=10090 GN=Aldh1a1 PE=1 SV=5	Aldh1a1	54.467	0.735	0.742	0.736	0.728	0.639	0.617	0.738	0.703	0.642
P12023	Amyloid-beta A4 protein OS=Mus musculus OX=10090 GN=App PE=1 SV=3	App	86.721	1.036		1.06	1.081		1.037	1.057		1.049
E9PYL2	Proline-rich protein 12 OS=Mus musculus OX=10090 GN=Prr12 PE=1 SV=1	Prr12	211.87	0.962	0.893		0.887	0.904		1.108	1.162
Q9ET47	Espin OS=Mus musculus OX=10090 GN=Espn PE=1 SV=2	Espn	94.496	1.04			0.866			0.887
Q9DAM7	Transmembrane protein 263 OS=Mus musculus OX=10090 GN=Tmem263 PE=1 SV=1	Tmem263	11.549
P97798	Neogenin OS=Mus musculus OX=10090 GN=Neo1 PE=1 SV=1	Neo1	163.16
Q8BWU5	Probable tRNA N6-adenosine threonylcarbamoyltransferase OS=Mus musculus OX=10090 GN=Osgep PE=1 SV=2	Osgep	36.3	0.932	1.028	0.953	1.012	1.057	0.957	1.173	1.184	0.895
Q8K2V6	Importin-11 OS=Mus musculus OX=10090 GN=Ipo11 PE=1 SV=1	Ipo11	112.41	1.038	1.018	1.102	1.056	1.101	1.198	1.022	1.05	1.223
P26040	Ezrin OS=Mus musculus OX=10090 GN=Ezr PE=1 SV=3	Ezr	69.406	1.07	1.069	1.053	0.976	0.994	0.996	1	1.03	0.984
Q9JIC3	DNA cross-link repair 1A protein OS=Mus musculus OX=10090 GN=Dclre1a PE=1 SV=2	Dclre1a	113.57		0.968			1.141			1.166
O09037	Regenerating islet-derived protein 3-alpha OS=Mus musculus OX=10090 GN=Reg3a PE=1 SV=1	Reg3a	19.539		1.114	0.681		1.521	0.684		1.504	0.695
Q8BGI4	Protein FAM13A OS=Mus musculus OX=10090 GN=Fam13a PE=1 SV=1	Fam13a	79.423	1.154			0.786			0.992
P70295	Ancient ubiquitous protein 1 OS=Mus musculus OX=10090 GN=Aup1 PE=1 SV=1	Aup1	46.121	0.985	1.079	0.975	0.949	1.013	0.987	1.005	0.936	0.993
P56135	ATP synthase subunit f, mitochondrial OS=Mus musculus OX=10090 GN=Atp5j2 PE=1 SV=3	Atp5j2	10.344	0.972		0.961	0.965		1.092	1.07		1.05
P63154	Crooked neck-like protein 1 OS=Mus musculus OX=10090 GN=Crnkl1 PE=1 SV=1	Crnkl1	83.415	1.042	0.992	1.028	1.01	1.091	1.114	1.072	1.056	1.098
Q99L20	Glutathione S-transferase theta-3 OS=Mus musculus OX=10090 GN=Gstt3 PE=1 SV=1	Gstt3	27.403	0.947	1.033	0.951	0.982	0.94	0.902	0.887	0.992	0.951
Q06180	Tyrosine-protein phosphatase non-receptor type 2 OS=Mus musculus OX=10090 GN=Ptpn2 PE=1 SV=2	Ptpn2	47.36		1.036	1.061		1.054	0.93		1.031	1.023
Q45VK7	Cytoplasmic dynein 2 heavy chain 1 OS=Mus musculus OX=10090 GN=Dync2h1 PE=1 SV=1	Dync2h1	492.33			0.699			0.878			1.651
Q9DB20	ATP synthase subunit O, mitochondrial OS=Mus musculus OX=10090 GN=Atp5o PE=1 SV=1	Atp5o	23.363	0.891	0.915	0.909	1.082	1.065	1.061	0.932	0.972	0.971
Q5SUD9	Bardet-Biedl syndrome 12 protein homolog OS=Mus musculus OX=10090 GN=Bbs12 PE=3 SV=2	Bbs12	78.334
P31786	Acyl-CoA-binding protein OS=Mus musculus OX=10090 GN=Dbi PE=1 SV=2	Dbi	10	0.92	0.9	0.891	0.691	0.632	0.661	0.716	0.766	0.795
P58462	Forkhead box protein P1 OS=Mus musculus OX=10090 GN=Foxp1 PE=1 SV=1	Foxp1	78.832
Q99MR8	Methylcrotonoyl-CoA carboxylase subunit alpha, mitochondrial OS=Mus musculus OX=10090 GN=Mccc1 PE=1 SV=2	Mccc1	79.343	0.903	1.005	0.959	1.006	1.077	1.031	0.881	1.09	1.12
Q6URW6	Myosin-14 OS=Mus musculus OX=10090 GN=Myh14 PE=1 SV=1	Myh14	228.58	0.939	0.958	0.958	1.106	1.076	1.115	0.935	0.96	0.96
Q9ES00	Ubiquitin conjugation factor E4 B OS=Mus musculus OX=10090 GN=Ube4b PE=1 SV=3	Ube4b	133.32	1.07	1.155	1.029	1.286	0.959	1.058	0.976	1.246	1.049
Q9QWT9	Kinesin-like protein KIFC1 OS=Mus musculus OX=10090 GN=Kifc1 PE=1 SV=2	Kifc1	74.152	1.047	1.052	0.946	1.134	1.083	1.006	1.247	1.138	1.158
Q9DCG9	Multifunctional methyltransferase subunit TRM112-like protein OS=Mus musculus OX=10090 GN=Trmt112 PE=1 SV=1	Trmt112	14.141	1.14	1.017	1.002	0.961	0.944	0.848	0.858	1.006	1.086
Q8BQ33	Treslin OS=Mus musculus OX=10090 GN=Ticrr PE=1 SV=2	Ticrr	208.33
P14432	H-2 class I histocompatibility antigen, TLA(B) alpha chain OS=Mus musculus OX=10090 GN=H2-T3 PE=1 SV=2	H2-T3	43.478		0.88	1.02		0.862	0.991		0.945	0.959
Q07113	Cation-independent mannose-6-phosphate receptor OS=Mus musculus OX=10090 GN=Igf2r PE=1 SV=1	Igf2r	273.81	1.033	0.981	1.006	1.032	1.089	1.118	1.013	1.051	1.028
Q6ZPJ3	(E3-independent) E2 ubiquitin-conjugating enzyme UBE2O OS=Mus musculus OX=10090 GN=Ube2o PE=1 SV=3	Ube2o	140.83	1.366	1.154	1.079	1.181	1.152	0.86	0.885	0.912	1.594
Q7TQK5	Coiled-coil domain-containing protein 93 OS=Mus musculus OX=10090 GN=Ccdc93 PE=1 SV=1	Ccdc93	72.602	1.006	1.066	0.982	0.967	0.943	0.964	1.096	0.967	1.01
Q99J23	GH3 domain-containing protein OS=Mus musculus OX=10090 GN=Ghdc PE=2 SV=2	Ghdc	58.507
Q8R3G9	Tetraspanin-8 OS=Mus musculus OX=10090 GN=Tspan8 PE=1 SV=1	Tspan8	25.582	0.956	0.98	0.947	1.086	1.21	1.151	1.063	1.048	1.101
Q91XA2	Golgi membrane protein 1 OS=Mus musculus OX=10090 GN=Golm1 PE=1 SV=2	Golm1	44.326	1.014	0.994	1.061	1.162	1.139	1.115	0.994	0.958	0.991
Q3UGP9	Leucine-rich repeat-containing protein 58 OS=Mus musculus OX=10090 GN=Lrrc58 PE=2 SV=1	Lrrc58	40.139
P06728	Apolipoprotein A-IV OS=Mus musculus OX=10090 GN=Apoa4 PE=1 SV=3	Apoa4	45.029	0.802	0.824	0.776	0.855	0.888	0.87	0.943	0.838	0.787
Q9Z0L8	Gamma-glutamyl hydrolase OS=Mus musculus OX=10090 GN=Ggh PE=1 SV=2	Ggh	35.469	0.956		0.927	0.872		0.714	0.872		0.848
P58682	Toll-like receptor 8 OS=Mus musculus OX=10090 GN=Tlr8 PE=1 SV=2	Tlr8	119.36	1.011			1.234			1.049
Q60634	Flotillin-2 OS=Mus musculus OX=10090 GN=Flot2 PE=1 SV=2	Flot2	47.037
Q6PF93	Phosphatidylinositol 3-kinase catalytic subunit type 3 OS=Mus musculus OX=10090 GN=Pik3c3 PE=1 SV=1	Pik3c3	101.49	1.078	1.007	1.074	1.459	1.022	1.015	1.452	1.048	1.15
Q7TNF9	Protein FAM117A OS=Mus musculus OX=10090 GN=Fam117a PE=1 SV=1	Fam117a	48.053			1.721			1.874			2.838
Q8C0Q2	Zinc fingers and homeoboxes protein 3 OS=Mus musculus OX=10090 GN=Zhx3 PE=1 SV=2	Zhx3	104.34			1.502			1.544			2.189
P54276	DNA mismatch repair protein Msh6 OS=Mus musculus OX=10090 GN=Msh6 PE=1 SV=3	Msh6	151.08	0.983	0.95	0.987	1	0.982	1.015	1.047	0.99	1.031
Q61191	Host cell factor 1 OS=Mus musculus OX=10090 GN=Hcfc1 PE=1 SV=2	Hcfc1	210.43	1.041	1.049	1.007	0.948	0.93	0.942	0.992	0.975	0.989
O35900	U6 snRNA-associated Sm-like protein LSm2 OS=Mus musculus OX=10090 GN=Lsm2 PE=1 SV=1	Lsm2	10.834	0.986	1.016	1.043	0.913	0.812	0.851	0.998	0.895	0.924
P61963	DDB1- and CUL4-associated factor 7 OS=Mus musculus OX=10090 GN=Dcaf7 PE=1 SV=1	Dcaf7	38.926	0.93	0.915	1.062	1.016	0.984	0.987	0.996	0.98	0.904
Q91W50	Cold shock domain-containing protein E1 OS=Mus musculus OX=10090 GN=Csde1 PE=1 SV=1	Csde1	88.79	1.041	1.047	1.039	1.143	1.118	1.125	1.103	1.088	1.11
Q9D8T7	SRA stem-loop-interacting RNA-binding protein, mitochondrial OS=Mus musculus OX=10090 GN=Slirp PE=1 SV=2	Slirp	12.605	0.958	0.912	0.949	0.955	0.961	1.053	1.016	0.918	1
Q8BFV2	PCI domain-containing protein 2 OS=Mus musculus OX=10090 GN=Pcid2 PE=1 SV=1	Pcid2	46.132		1.048	1.001		0.951	1.016		1.013	0.996
Q9CX97	WD repeat-containing protein 55 OS=Mus musculus OX=10090 GN=Wdr55 PE=1 SV=2	Wdr55	42.61	0.983	1.042		1.13	0.989		1.042	0.957
Q9QWV9	Cyclin-T1 OS=Mus musculus OX=10090 GN=Ccnt1 PE=1 SV=3	Ccnt1	80.597	1.013	1.151	1.044	0.812	0.916	1.059	0.996	0.993	1.086
Q2VPQ9	Chromatin modification-related protein MEAF6 OS=Mus musculus OX=10090 GN=Meaf6 PE=1 SV=1	Meaf6	21.649	1.019	1.001		0.953	0.85		0.988	0.946
Q8BGR9	Ubiquitin-like domain-containing CTD phosphatase 1 OS=Mus musculus OX=10090 GN=Ublcp1 PE=1 SV=1	Ublcp1	36.836	0.942		0.944	0.852		0.751	1.178		0.776
Q61967	Zinc finger protein 90 OS=Mus musculus OX=10090 GN=Zfp90 PE=1 SV=1	Zfp90	72.422
Q9DB40	Mediator of RNA polymerase II transcription subunit 27 OS=Mus musculus OX=10090 GN=Med27 PE=2 SV=2	Med27	35.297		0.983			1.15			1.195
Q9CRA7	ATP synthase subunit s, mitochondrial OS=Mus musculus OX=10090 GN=Atp5s PE=1 SV=1	Atp5s	23.275	0.817		0.915	0.966		1.08	0.856		1.043
Q9CWK8	Sorting nexin-2 OS=Mus musculus OX=10090 GN=Snx2 PE=1 SV=2	Snx2	58.47	1.076	1.08	1.011	0.927	0.911	0.902	0.917	0.94	0.873
P17665	Cytochrome c oxidase subunit 7C, mitochondrial OS=Mus musculus OX=10090 GN=Cox7c PE=1 SV=1	Cox7c	7.3325	0.816	0.836	0.799	1.087	1.167	1.096	0.863	0.932	0.937
Q9CWS0	N(G),N(G)-dimethylarginine dimethylaminohydrolase 1 OS=Mus musculus OX=10090 GN=Ddah1 PE=1 SV=3	Ddah1	31.381	1.031	0.988	1.051	0.78	0.78	0.885	0.88	0.995	0.916
O35134	DNA-directed RNA polymerase I subunit RPA1 OS=Mus musculus OX=10090 GN=Polr1a PE=1 SV=2	Polr1a	194.11	1.107	1.045	1.198	1.227	1.167	1.229	1.174	1.16	1.138
Q9ER39	Torsin-1A OS=Mus musculus OX=10090 GN=Tor1a PE=1 SV=1	Tor1a	37.829	1.031	0.908	0.984	1.064	1.013	1.161	1.015	1.026	1.31
P63094	Guanine nucleotide-binding protein G(s) subunit alpha isoforms short OS=Mus musculus OX=10090 GN=Gnas PE=1 SV=1	Gnas	45.663	0.993	1.02	1.043	1.059	1.063	1.122	1.01	0.99	0.992
Q9D0M1	Phosphoribosyl pyrophosphate synthase-associated protein 1 OS=Mus musculus OX=10090 GN=Prpsap1 PE=1 SV=1	Prpsap1	39.431	0.944	0.931	0.947	0.899	0.979	0.996	1.057	0.957	0.929
Q3TIU4	2',5'-phosphodiesterase 12 OS=Mus musculus OX=10090 GN=Pde12 PE=1 SV=2	Pde12	67.513	0.912	0.957	1.006	1.225	1.07	1.03	1.318	1.235	1.142
Q9D0A3	Arpin OS=Mus musculus OX=10090 GN=Arpin PE=1 SV=1	Arpin	25.193	1.005	1.04	1.02	0.971	0.801	0.932	0.868	0.847	0.832
Q9JK23	Proteasome assembly chaperone 1 OS=Mus musculus OX=10090 GN=Psmg1 PE=1 SV=1	Psmg1	33.104	1.061	0.98	1.028	0.96	0.994	0.944	0.952	0.929	0.93
Q6PIP5	NudC domain-containing protein 1 OS=Mus musculus OX=10090 GN=Nudcd1 PE=1 SV=2	Nudcd1	66.704		1.073	0.915		0.969	0.783		1.01	0.812
Q71FD7	Filamin-binding LIM protein 1 OS=Mus musculus OX=10090 GN=Fblim1 PE=1 SV=2	Fblim1	41.026	0.931	0.962	0.965	1.103	1.05	1.053	0.984	1.122	1.02
P32507	Nectin-2 OS=Mus musculus OX=10090 GN=Nectin2 PE=1 SV=2	Nectin2	57.317	1.026	1.081	1.166	1.051	1.074	1.406	1.521	1.189	1.356
Q9D892	Inosine triphosphate pyrophosphatase OS=Mus musculus OX=10090 GN=Itpa PE=1 SV=2	Itpa	21.897		0.957	1.045		0.816	0.873		0.881	1.024
O35604	NPC intracellular cholesterol transporter 1 OS=Mus musculus OX=10090 GN=Npc1 PE=1 SV=2	Npc1	142.88
Q9CQM9	Glutaredoxin-3 OS=Mus musculus OX=10090 GN=Glrx3 PE=1 SV=1	Glrx3	37.778	1.038	1.014	1.03	0.898	0.841	0.808	0.915	0.839	0.84
Q8BI08	Protein MAL2 OS=Mus musculus OX=10090 GN=Mal2 PE=1 SV=1	Mal2	19.094			0.98			1.039			0.966
Q80W94	2-acylglycerol O-acyltransferase 2 OS=Mus musculus OX=10090 GN=Mogat2 PE=1 SV=1	Mogat2	38.591	0.781	0.781	0.876	1.035	1.037	1.027	0.983	1.019	1.144
Q80YV3	Transformation/transcription domain-associated protein OS=Mus musculus OX=10090 GN=Trrap PE=1 SV=2	Trrap	291.55	0.987	1.015	1.006	1.09	1.127	1.041	1.03	1.173	1.11
Q8C4M7	Centromere protein U OS=Mus musculus OX=10090 GN=Cenpu PE=1 SV=2	Cenpu	46.37		1.037			1.03			1.219
Q9CPY6	Glucose-induced degradation protein 4 homolog OS=Mus musculus OX=10090 GN=Gid4 PE=1 SV=1	Gid4	24.863		1.114	1.032		0.993	1.15		1.571	1.079
Q9CZN7	Serine hydroxymethyltransferase, mitochondrial OS=Mus musculus OX=10090 GN=Shmt2 PE=1 SV=1	Shmt2	55.758	1.023	1.02	1.043	0.946	0.921	0.989	0.948	0.975	0.993
Q8BNL5	BTB/POZ domain-containing protein KCTD6 OS=Mus musculus OX=10090 GN=Kctd6 PE=2 SV=1	Kctd6	27.624
Q9WUM3	Coronin-1B OS=Mus musculus OX=10090 GN=Coro1b PE=1 SV=1	Coro1b	53.912	0.961	0.983	1.011	0.879	0.888	0.914	0.927	0.922	0.942
Q99MP8	BRCA1-associated protein OS=Mus musculus OX=10090 GN=Brap PE=1 SV=1	Brap	66.99
Q3UY34	Protein CUSTOS OS=Mus musculus OX=10090 GN=Custos PE=2 SV=1	Custos	27.631		1.066			0.712			1.109
Q7TSN7	Immunoglobulin superfamily member 5 OS=Mus musculus OX=10090 GN=Igsf5 PE=1 SV=1	Igsf5	40.291	0.869			1.019			1.068
P68134	Actin, alpha skeletal muscle OS=Mus musculus OX=10090 GN=Acta1 PE=1 SV=1	Acta1	42.051			1.052			1.043			0.938
O88533	Aromatic-L-amino-acid decarboxylase OS=Mus musculus OX=10090 GN=Ddc PE=1 SV=1	Ddc	53.873	0.874	0.896	0.888	0.77	0.794	0.802	0.848	0.896	0.846
Q8VE18	Protein SMG8 OS=Mus musculus OX=10090 GN=Smg8 PE=1 SV=1	Smg8	109.67			1.144			1.015			0.926
Q6ZPV2	Chromatin-remodeling ATPase INO80 OS=Mus musculus OX=10090 GN=Ino80 PE=1 SV=2	Ino80	176.52
Q920B9	FACT complex subunit SPT16 OS=Mus musculus OX=10090 GN=Supt16h PE=1 SV=2	Supt16h	119.82	1.001	1.032	1.07	1.006	1.023	0.994	0.954	1.001	0.926
O54864	Histone-lysine N-methyltransferase SUV39H1 OS=Mus musculus OX=10090 GN=Suv39h1 PE=1 SV=1	Suv39h1	47.754	1.134	0.948	1.085	0.984	1.24	1.01	1.682	1.548	0.995
Q9D7G0	Ribose-phosphate pyrophosphokinase 1 OS=Mus musculus OX=10090 GN=Prps1 PE=1 SV=4	Prps1	34.834	1.022	0.999	0.988	1.159	1.064	1.01	1.047	0.991	0.977
Q9D0B6	Protein PBDC1 OS=Mus musculus OX=10090 GN=Pbdc1 PE=1 SV=1	Pbdc1	22.223	1.067	1.071	1.028	0.796	0.835	0.863	0.991	0.896	0.985
Q9D2G2	Dihydrolipoyllysine-residue succinyltransferase component of 2-oxoglutarate dehydrogenase complex, mitochondrial OS=Mus musculus OX=10090 GN=Dlst PE=1 SV=1	Dlst	48.994	0.909	0.864	0.893	1.146	1.072	1.116	1.139	1.051	1.051
Q3THE2	Myosin regulatory light chain 12B OS=Mus musculus OX=10090 GN=Myl12b PE=1 SV=2	Myl12b	19.779	1.009	1	1.052	1.03	1.032	1.093	0.964	0.943	0.88
Q9DBE0	Cysteine sulfinic acid decarboxylase OS=Mus musculus OX=10090 GN=Csad PE=1 SV=1	Csad	55.144	0.884	0.721	0.981	0.969	0.736	0.93	1.024	0.793	0.919
Q9R1P3	Proteasome subunit beta type-2 OS=Mus musculus OX=10090 GN=Psmb2 PE=1 SV=1	Psmb2	22.906	1.03	1.009	1.002	0.86	0.842	0.961	0.881	0.893	1.022
Q8R1R3	StAR-related lipid transfer protein 7, mitochondrial OS=Mus musculus OX=10090 GN=Stard7 PE=1 SV=2	Stard7	43.144	1.002	0.75		0.957	0.987		1.246	1.421
Q61686	Chromobox protein homolog 5 OS=Mus musculus OX=10090 GN=Cbx5 PE=1 SV=1	Cbx5	22.186	1.053	1.009	1.058	0.964	0.847	0.886	0.983	1.016	0.952
Q8CAY6	Acetyl-CoA acetyltransferase, cytosolic OS=Mus musculus OX=10090 GN=Acat2 PE=1 SV=2	Acat2	41.297	0.996	0.998	1.046	0.849	0.75	0.754	0.965	0.75	0.734
E9Q0N2	Receptor-type tyrosine-protein phosphatase H OS=Mus musculus OX=10090 GN=Ptprh PE=1 SV=1	Ptprh	106.95			1.015			0.929			0.955
Q9CPS6	Histidine triad nucleotide-binding protein 3 OS=Mus musculus OX=10090 GN=Hint3 PE=1 SV=1	Hint3	18.787	0.879	0.914		1.039	1.037		0.915	0.994
Q5SYD0	Unconventional myosin-Id OS=Mus musculus OX=10090 GN=Myo1d PE=1 SV=1	Myo1d	116.08	0.994	0.992	1.005	1.095	1.121	1.088	0.936	0.951	0.967
Q8K0L0	Ankyrin repeat and SOCS box protein 2 OS=Mus musculus OX=10090 GN=Asb2 PE=1 SV=1	Asb2	70.22
Q8BHJ9	Pre-mRNA-splicing factor SLU7 OS=Mus musculus OX=10090 GN=Slu7 PE=1 SV=1	Slu7	68.079	0.902		1.049	0.887		1.051	1.351		1.181
Q9D1A2	Cytosolic non-specific dipeptidase OS=Mus musculus OX=10090 GN=Cndp2 PE=1 SV=1	Cndp2	52.767	0.754	0.815	0.777	0.684	0.728	0.696	0.714	0.77	0.724
Q8JZR0	Long-chain-fatty-acid--CoA ligase 5 OS=Mus musculus OX=10090 GN=Acsl5 PE=1 SV=1	Acsl5	76.205	0.705	0.73	0.717	0.928	0.951	0.954	0.931	0.934	0.946
Q9WUD1	STIP1 homology and U box-containing protein 1 OS=Mus musculus OX=10090 GN=Stub1 PE=1 SV=1	Stub1	34.909	0.969	1.047	0.961	1.005	1.039	1.012	1.146	1.012	1.079
Q61410	cGMP-dependent protein kinase 2 OS=Mus musculus OX=10090 GN=Prkg2 PE=1 SV=1	Prkg2	87.084	0.891	0.904	0.878	0.969	1.038	0.967	0.904	1.001	0.875
E9PZM4	Chromodomain-helicase-DNA-binding protein 2 OS=Mus musculus OX=10090 GN=Chd2 PE=1 SV=1	Chd2	210.8	0.975		0.62	1.005		0.996	1.075		1.375
Q6ZPY7	Lysine-specific demethylase 3B OS=Mus musculus OX=10090 GN=Kdm3b PE=1 SV=2	Kdm3b	170.87	1.03	0.989	1.045	1.033	0.927	1.017	1.068	1.126	1.001
Q8VCA5	Transmembrane protease serine 4 OS=Mus musculus OX=10090 GN=Tmprss4 PE=2 SV=1	Tmprss4	47.495		0.908			0.935			0.933
Q8VDJ3	Vigilin OS=Mus musculus OX=10090 GN=Hdlbp PE=1 SV=1	Hdlbp	141.74	1.038	1.022	1.068	1.015	1.02	1.034	1.074	1.041	1.034
Q9JLT2	Trehalase OS=Mus musculus OX=10090 GN=Treh PE=1 SV=1	Treh	65.4	0.888	0.966	0.888	0.829	0.97	0.839	0.902	0.917	0.84
Q05909	Receptor-type tyrosine-protein phosphatase gamma OS=Mus musculus OX=10090 GN=Ptprg PE=1 SV=1	Ptprg	161.24
Q8VE08	F-box only protein 33 OS=Mus musculus OX=10090 GN=Fbxo33 PE=1 SV=3	Fbxo33	63.362
P02802	Metallothionein-1 OS=Mus musculus OX=10090 GN=Mt1 PE=1 SV=1	Mt1	6.0181	0.402	0.466	0.416	0.322	0.259	0.29	0.343	0.34	0.357
Q9D7H3	RNA 3'-terminal phosphate cyclase OS=Mus musculus OX=10090 GN=RtcA PE=1 SV=2	RtcA	39.254	0.885	0.93	1.018	1.046	1.141	1.116	1.052	1.071	1.06
Q6PCM1	Lysine-specific demethylase 3A OS=Mus musculus OX=10090 GN=Kdm3a PE=1 SV=1	Kdm3a	147.85			0.93			0.959			0.836
Q8VD65	Phosphoinositide 3-kinase regulatory subunit 4 OS=Mus musculus OX=10090 GN=Pik3r4 PE=1 SV=3	Pik3r4	152.6	0.922	1.047	0.953	0.989	1.098	1.03	1.041	1.085	0.968
Q8BHZ4	Zinc finger protein 592 OS=Mus musculus OX=10090 GN=Znf592 PE=1 SV=3	Znf592	137.51		0.986			1.028			0.921
Q9D7E4	UPF0449 protein C19orf25 homolog OS=Mus musculus OX=10090 PE=1 SV=1	---	12.111	1.02			1.034			1.057
P63011	Ras-related protein Rab-3A OS=Mus musculus OX=10090 GN=Rab3a PE=1 SV=1	Rab3a	24.97
P53994	Ras-related protein Rab-2A OS=Mus musculus OX=10090 GN=Rab2a PE=1 SV=1	Rab2a	23.547	0.984	0.951	0.997	1.038	1.011	0.998	0.965	0.954	1.03
Q9CWU9	Nucleoporin Nup37 OS=Mus musculus OX=10090 GN=Nup37 PE=1 SV=2	Nup37	36.731	1.084	1.037	1.002	1.12	1.096	1.135	1.108	0.987	1.083
Q3UPW2	ETS-related transcription factor Elf-3 OS=Mus musculus OX=10090 GN=Elf3 PE=1 SV=1	Elf3	44.273		1.165	1.093		1.007	1.168		0.941	1.039
Q923Z3	Protein MTO1 homolog, mitochondrial OS=Mus musculus OX=10090 GN=Mto1 PE=2 SV=1	Mto1	74.331	1.007		0.979	0.964		1.009	1.096		1.099
Q80ZV0	Ribonuclease H2 subunit B OS=Mus musculus OX=10090 GN=Rnaseh2b PE=1 SV=2	Rnaseh2b	34.729	1.074	1.047	1.022	0.947	0.748	0.694	1.124	0.799	0.78
Q8CHK4	Histone acetyltransferase KAT5 OS=Mus musculus OX=10090 GN=Kat5 PE=1 SV=2	Kat5	58.597		1.082			0.995			1.021
P70444	BH3-interacting domain death agonist OS=Mus musculus OX=10090 GN=Bid PE=1 SV=2	Bid	21.951		1.207	1.064		1.041	1.035		1.496	1.015
Q9WTI7	Unconventional myosin-Ic OS=Mus musculus OX=10090 GN=Myo1c PE=1 SV=2	Myo1c	121.94	1.049	0.961	0.992	1.344	1.284	1.38	1.31	1.309	1.186
E9QAM5	Helicase with zinc finger domain 2 OS=Mus musculus OX=10090 GN=Helz2 PE=1 SV=1	Helz2	331.56		0.93	1.04		1.09	1.003		1.136	0.956
P97431	Interferon regulatory factor 6 OS=Mus musculus OX=10090 GN=Irf6 PE=1 SV=2	Irf6	53.11	0.997	0.954	1.007	0.888	0.894	0.931	0.949	0.859	0.845
Q9CZT4	DNA-directed RNA polymerase III subunit RPC5 OS=Mus musculus OX=10090 GN=Polr3e PE=1 SV=2	Polr3e	79.853			0.981			0.873			1.106
O35972	39S ribosomal protein L23, mitochondrial OS=Mus musculus OX=10090 GN=Mrpl23 PE=1 SV=1	Mrpl23	17.121	0.931	0.937	0.988	0.981	1.097	0.955	1.075	1.108	1.123
Q5SVL6	Rap1 GTPase-activating protein 2 OS=Mus musculus OX=10090 GN=Rap1gap2 PE=1 SV=1	Rap1gap2	78.253		0.972	1.047		0.934	1.006		0.973	1.002
Q9R0P4	Small acidic protein OS=Mus musculus OX=10090 GN=Smap PE=1 SV=1	Smap	20.046	1.011	1.018	1.112	0.743	0.818	0.928	0.881	0.939	0.914
Q5XF89	Probable cation-transporting ATPase 13A3 OS=Mus musculus OX=10090 GN=Atp13a3 PE=1 SV=1	Atp13a3	137.47
P29758	Ornithine aminotransferase, mitochondrial OS=Mus musculus OX=10090 GN=Oat PE=1 SV=1	Oat	48.354	0.868	0.869	0.852	0.781	0.737	0.772	0.851	0.823	0.826
Q60596	DNA repair protein XRCC1 OS=Mus musculus OX=10090 GN=Xrcc1 PE=1 SV=2	Xrcc1	68.97	0.99	0.991	1.036	1.014	1.097	0.938	0.946	1.189	1.009
Q60928	Glutathione hydrolase 1 proenzyme OS=Mus musculus OX=10090 GN=Ggt1 PE=1 SV=1	Ggt1	61.562	0.884	0.862		0.829	0.914		0.825	0.999
Q8BJS8	Mdm2-binding protein OS=Mus musculus OX=10090 GN=Mtbp PE=1 SV=1	Mtbp	100.31		1.155			1.166			1.244
Q6NZJ6	Eukaryotic translation initiation factor 4 gamma 1 OS=Mus musculus OX=10090 GN=Eif4g1 PE=1 SV=1	Eif4g1	176.07	1.122	1.091	1.102	1.008	0.954	0.994	1.055	1.031	1.054
Q9CRB3	5-hydroxyisourate hydrolase OS=Mus musculus OX=10090 GN=Urah PE=1 SV=1	Urah	13.559			0.958			1.056			1.013
Q9JKV1	Proteasomal ubiquitin receptor ADRM1 OS=Mus musculus OX=10090 GN=Adrm1 PE=1 SV=2	Adrm1	42.06	0.948	1.03	1.037	1.108	0.954	1.072	0.977	1.007	0.998
Q8BVW3	Tripartite motif-containing protein 14 OS=Mus musculus OX=10090 GN=Trim14 PE=1 SV=2	Trim14	49.64
Q8BYL4	Tyrosine--tRNA ligase, mitochondrial OS=Mus musculus OX=10090 GN=Yars2 PE=1 SV=2	Yars2	52.597	0.962	0.935	0.978	1.07	1.141	1.089	1.033	0.97	1.048
P62743	AP-2 complex subunit sigma OS=Mus musculus OX=10090 GN=Ap2s1 PE=1 SV=1	Ap2s1	17.018	0.974	1.082	1.116	0.92	1.014	1.076	0.896	1.147	1.323
Q80UX8	Protein ABHD13 OS=Mus musculus OX=10090 GN=Abhd13 PE=2 SV=1	Abhd13	38.525
Q9CXG3	Peptidyl-prolyl cis-trans isomerase-like 4 OS=Mus musculus OX=10090 GN=Ppil4 PE=1 SV=2	Ppil4	57.23	1.011	1.066	1.042	0.966	0.964	0.906	1.08	1.005	1.244
Q3U2A8	Valine--tRNA ligase, mitochondrial OS=Mus musculus OX=10090 GN=Vars2 PE=1 SV=2	Vars2	118.46	0.966	0.991	0.996	0.943	1.123	1.005	1.115	1.044	1.243
O08997	Copper transport protein ATOX1 OS=Mus musculus OX=10090 GN=Atox1 PE=1 SV=1	Atox1	7.3384	0.907		0.922	0.677		0.836	0.6		0.864
Q91V09	WD repeat-containing protein 13 OS=Mus musculus OX=10090 GN=Wdr13 PE=1 SV=1	Wdr13	53.663
Q6ZQA0	Neurobeachin-like protein 2 OS=Mus musculus OX=10090 GN=Nbeal2 PE=1 SV=2	Nbeal2	301.92	0.995	1.084		1.151	0.961		0.81	1.13
Q9CQ89	Protein CutA OS=Mus musculus OX=10090 GN=Cuta PE=1 SV=3	Cuta	18.865		1.093	1.057		0.826	1.013		0.828	1.21
Q9QXB9	Developmentally-regulated GTP-binding protein 2 OS=Mus musculus OX=10090 GN=Drg2 PE=1 SV=1	Drg2	40.718	1.103	0.999	1.044	1.004	1.127	1.027	1.072	1.122	1.049
Q60876	Eukaryotic translation initiation factor 4E-binding protein 1 OS=Mus musculus OX=10090 GN=Eif4ebp1 PE=1 SV=3	Eif4ebp1	12.325	0.997			0.912			1.201
Q91ZW3	SWI/SNF-related matrix-associated actin-dependent regulator of chromatin subfamily A member 5 OS=Mus musculus OX=10090 GN=Smarca5 PE=1 SV=1	Smarca5	121.63	1.024	1.051	1.036	1.005	1.023	1.049	0.998	1.02	1.034
Q9WTL7	Acyl-protein thioesterase 2 OS=Mus musculus OX=10090 GN=Lypla2 PE=1 SV=1	Lypla2	24.794	0.925	0.994	0.992	0.837	0.776	0.871	0.977	0.925	0.967
P62307	Small nuclear ribonucleoprotein F OS=Mus musculus OX=10090 GN=Snrpf PE=1 SV=1	Snrpf	9.7251	0.995	1.04	1.085	0.92	0.895	1.03	1.004	1.035	0.999
Q8CHY6	Transcriptional repressor p66 alpha OS=Mus musculus OX=10090 GN=Gatad2a PE=1 SV=2	Gatad2a	67.333	0.928	1.075	0.875	0.959	0.981	0.832	1.197	1.057	1.366
P62715	Serine/threonine-protein phosphatase 2A catalytic subunit beta isoform OS=Mus musculus OX=10090 GN=Ppp2cb PE=1 SV=1	Ppp2cb	35.575	1.067	0.93	0.999	0.949	0.968	0.995	1.092	0.959	0.892
P70695	Fructose-1,6-bisphosphatase isozyme 2 OS=Mus musculus OX=10090 GN=Fbp2 PE=1 SV=2	Fbp2	36.947	0.91	0.885	0.909	0.759	0.732	0.75	0.816	0.755	0.706
Q9EPV8	Ubiquitin-like protein 5 OS=Mus musculus OX=10090 GN=Ubl5 PE=1 SV=1	Ubl5	8.5468	1.102	1.032	1.117	1.112	1.15	1.044	1.164	1.246	1.124
Q8CHT3	Integrator complex subunit 5 OS=Mus musculus OX=10090 GN=Ints5 PE=2 SV=1	Ints5	108.35	0.923	0.963	1.006	0.971	0.951	1.045	1.054	0.87	0.967
P24860	G2/mitotic-specific cyclin-B1 OS=Mus musculus OX=10090 GN=Ccnb1 PE=1 SV=3	Ccnb1	48.051	1.042	0.976	1.063	1.211	1.199	1.19	1.226	1.213	1.198
Q60641	Bile acid receptor OS=Mus musculus OX=10090 GN=Nr1h4 PE=1 SV=3	Nr1h4	55.994			1.035			1.186			1.182
Q80V86	Integrator complex subunit 8 OS=Mus musculus OX=10090 GN=Ints8 PE=1 SV=1	Ints8	113.35		0.967			1.056			1.077
Q9Z2A0	3-phosphoinositide-dependent protein kinase 1 OS=Mus musculus OX=10090 GN=Pdpk1 PE=1 SV=2	Pdpk1	63.758			1.123			1.494			1.519
Q68FH0	Plakophilin-4 OS=Mus musculus OX=10090 GN=Pkp4 PE=1 SV=1	Pkp4	131.55	0.988	1.112	0.962	0.998	1.152	1.074	1.279	1.343	1.085
Q9CRY7	Lysophospholipase D GDPD1 OS=Mus musculus OX=10090 GN=Gdpd1 PE=1 SV=1	Gdpd1	35.866	0.852	0.93	0.856	1.082	1.056	1.052	1.018	1.019	1.015
Q7TSG2	RNA polymerase II subunit A C-terminal domain phosphatase OS=Mus musculus OX=10090 GN=Ctdp1 PE=1 SV=1	Ctdp1	104.55	1.036	0.995	1.028	0.972	0.967	1.041	0.97	1.051	0.979
Q71RI9	Kynurenine--oxoglutarate transaminase 3 OS=Mus musculus OX=10090 GN=Kyat3 PE=1 SV=1	Kyat3	51.126
Q5XKN4	Protein jagunal homolog 1 OS=Mus musculus OX=10090 GN=Jagn1 PE=1 SV=2	Jagn1	21.102	1.049	1.052	0.981	0.986	1.149	1.202	1.024	1.009	1.14
P97461	40S ribosomal protein S5 OS=Mus musculus OX=10090 GN=Rps5 PE=1 SV=3	Rps5	22.889	1.024	1.019	1.031	1.012	1.049	1.031	0.963	0.973	0.991
A2ARV4	Low-density lipoprotein receptor-related protein 2 OS=Mus musculus OX=10090 GN=Lrp2 PE=1 SV=1	Lrp2	519.2	0.972	1.084		1.001	1.501		0.933	1.719
Q9CQC6	Basic leucine zipper and W2 domain-containing protein 1 OS=Mus musculus OX=10090 GN=Bzw1 PE=1 SV=1	Bzw1	48.043	1.069	1.071	1.075	1.013	1.011	1.058	1.013	1.026	1.031
Q91Y97	Fructose-bisphosphate aldolase B OS=Mus musculus OX=10090 GN=Aldob PE=1 SV=3	Aldob	39.507	0.653	0.639	0.671	0.511	0.537	0.542	0.589	0.522	0.527
P10639	Thioredoxin OS=Mus musculus OX=10090 GN=Txn PE=1 SV=3	Txn	11.675	0.942	0.901	0.966	0.787	0.835	0.786	0.752	0.883	0.803
Q99L27	GMP reductase 2 OS=Mus musculus OX=10090 GN=Gmpr2 PE=1 SV=2	Gmpr2	38.018	0.954	0.947	0.974	0.948	0.96	0.921	0.903	0.896	0.888
Q62351	Transferrin receptor protein 1 OS=Mus musculus OX=10090 GN=Tfrc PE=1 SV=1	Tfrc	85.73	1.003	1.046	1.032	1.275	1.238	1.293	1.227	1.292	1.277
Q8BSI6	R3H and coiled-coil domain-containing protein 1 OS=Mus musculus OX=10090 GN=R3hcc1 PE=1 SV=3	R3hcc1	54.163
Q9ERU3	Zinc finger protein 22 OS=Mus musculus OX=10090 GN=Znf22 PE=1 SV=2	Znf22	27.294		0.879	0.956		0.964	1.064		0.868	0.997
Q921Y4	Molybdate-anion transporter OS=Mus musculus OX=10090 GN=Mfsd5 PE=2 SV=1	Mfsd5	49.679		0.965			0.944			1.069
Q99PI4	Phosphatidate phosphatase LPIN3 OS=Mus musculus OX=10090 GN=Lpin3 PE=1 SV=1	Lpin3	94.315			0.887			0.902			0.918
Q99KN1	Arrestin domain-containing protein 1 OS=Mus musculus OX=10090 GN=Arrdc1 PE=1 SV=2	Arrdc1	46.329	0.962	1.058	1.037	0.985	1.019	1.034	1.07	0.857	0.896
Q8R0K9	Transcription factor E2F4 OS=Mus musculus OX=10090 GN=E2f4 PE=1 SV=1	E2f4	43.833		1.019	1.098		1.278	1.121		1.324	1.193
Q9CQP3	Coiled-coil-helix-coiled-coil-helix domain-containing protein 5 OS=Mus musculus OX=10090 GN=Chchd5 PE=1 SV=1	Chchd5	12.326	1.048		1.121	1.011		1.054	1.191		1.085
Q9JJI6	GPI ethanolamine phosphate transferase 3 OS=Mus musculus OX=10090 GN=Pigo PE=1 SV=2	Pigo	119.16	0.913		0.944	1.162		1.224	1.174		1.226
Q9CPW3	39S ribosomal protein L54, mitochondrial OS=Mus musculus OX=10090 GN=Mrpl54 PE=1 SV=1	Mrpl54	15.422	1.022			0.832			0.998
Q6ZWR6	Nesprin-1 OS=Mus musculus OX=10090 GN=Syne1 PE=1 SV=2	Syne1	1009.9
Q8R326	Paraspeckle component 1 OS=Mus musculus OX=10090 GN=Pspc1 PE=1 SV=1	Pspc1	58.758	0.992	1.079	1.032	1.036	1.068	0.929	1.096	0.907	1.026
Q9QUR8	Semaphorin-7A OS=Mus musculus OX=10090 GN=Sema7a PE=1 SV=1	Sema7a	74.993		0.905	0.941		0.974	0.88		1.002	0.969
Q8BK72	28S ribosomal protein S27, mitochondrial OS=Mus musculus OX=10090 GN=Mrps27 PE=1 SV=2	Mrps27	47.778	0.95	0.986	1.046	0.942	0.976	0.961	0.895	0.926	0.996
Q9WV92	Band 4.1-like protein 3 OS=Mus musculus OX=10090 GN=Epb41l3 PE=1 SV=1	Epb41l3	103.34	0.868	0.913	0.931	0.933	0.888	0.914	1.064	0.924	0.966
P53808	Phosphatidylcholine transfer protein OS=Mus musculus OX=10090 GN=Pctp PE=1 SV=2	Pctp	24.785		0.867			0.74			0.741
Q8BY71	Histone acetyltransferase type B catalytic subunit OS=Mus musculus OX=10090 GN=Hat1 PE=1 SV=1	Hat1	49.278	1.037	1.077	1.015	1.031	1.012	1.027	1.047	1.042	1.107
Q8K0E8	Fibrinogen beta chain OS=Mus musculus OX=10090 GN=Fgb PE=1 SV=1	Fgb	54.752	1.202	1.269	1.216	1.627	1.889	1.715	1.696	1.953	1.856
P61080	Ubiquitin-conjugating enzyme E2 D1 OS=Mus musculus OX=10090 GN=Ube2d1 PE=1 SV=1	Ube2d1	16.602	1.07	1.015		0.98	1.105		1.173	1.011
Q9ER00	Syntaxin-12 OS=Mus musculus OX=10090 GN=Stx12 PE=1 SV=1	Stx12	31.195	1.042	1.073	1.009	0.964	0.983	1.047	0.964	0.949	1.055
Q9CQ56	Vesicle transport protein USE1 OS=Mus musculus OX=10090 GN=Use1 PE=1 SV=1	Use1	30.593	1.037	1.064	1.019	1.132	1.086	1.266	1.084	1.058	1.229
Q9CQX4	PCNA-associated factor OS=Mus musculus OX=10090 GN=Pclaf PE=1 SV=1	Pclaf	11.993	1.233	1.235	1.231	0.974	0.988	0.972	1.284	1.278	1.236
Q8BHJ6	Serine incorporator 5 OS=Mus musculus OX=10090 GN=Serinc5 PE=2 SV=1	Serinc5	51.831	0.734			1.05			1.5
Q70FJ1	A-kinase anchor protein 9 OS=Mus musculus OX=10090 GN=Akap9 PE=1 SV=2	Akap9	435.87	1.033	0.987	0.931	0.966	0.912	0.917	0.913	1.04	1.087
Q8VBW5	HMG box transcription factor BBX OS=Mus musculus OX=10090 GN=Bbx PE=1 SV=2	Bbx	100.78	1.057	1	1.015	1.017	0.905	0.908	0.931	0.934	0.937
Q08652	Retinol-binding protein 2 OS=Mus musculus OX=10090 GN=Rbp2 PE=2 SV=2	Rbp2	15.609	0.667	0.73	0.669	0.683	0.607	0.659	0.721	0.769	0.722
Q8VE38	Oxidoreductase NAD-binding domain-containing protein 1 OS=Mus musculus OX=10090 GN=Oxnad1 PE=1 SV=2	Oxnad1	34.727	0.904	0.961	0.936	1.045	1.07	1.09	0.989	0.839	1.159
Q9Z248	Zinc finger protein AEBP2 OS=Mus musculus OX=10090 GN=Aebp2 PE=1 SV=2	Aebp2	52.962
P60060	Protein transport protein Sec61 subunit gamma OS=Mus musculus OX=10090 GN=Sec61g PE=3 SV=1	Sec61g	7.7412	0.948	1.216		0.796	0.994		1.289	1.007
O54965	E3 ubiquitin-protein ligase RNF13 OS=Mus musculus OX=10090 GN=Rnf13 PE=1 SV=2	Rnf13	42.732			0.937			1.053			0.971
A2AJ88	Patatin-like phospholipase domain-containing protein 7 OS=Mus musculus OX=10090 GN=Pnpla7 PE=1 SV=1	Pnpla7	150.49			1.089			0.926			1.192
Q8BIQ5	Cleavage stimulation factor subunit 2 OS=Mus musculus OX=10090 GN=Cstf2 PE=1 SV=2	Cstf2	61.341	1.077	1.048	1.074	0.974	0.837	0.954	0.964	0.958	1.013
P97473	RISC-loading complex subunit TARBP2 OS=Mus musculus OX=10090 GN=Tarbp2 PE=1 SV=2	Tarbp2	38.842
Q8R1N4	NudC domain-containing protein 3 OS=Mus musculus OX=10090 GN=Nudcd3 PE=1 SV=3	Nudcd3	40.89		0.993	1.163		0.998	0.887		1.085	1.157
Q99J45	Nuclear receptor-binding protein OS=Mus musculus OX=10090 GN=Nrbp1 PE=1 SV=1	Nrbp1	59.865	1.077	1.107	1.185	0.991	0.915	1.044	1.062	1.071	1.013
Q99NF1	Beta,beta-carotene 9',10'-oxygenase OS=Mus musculus OX=10090 GN=Bco2 PE=1 SV=1	Bco2	60.142
Q9DC48	Pre-mRNA-processing factor 17 OS=Mus musculus OX=10090 GN=Cdc40 PE=2 SV=1	Cdc40	65.46	1.113	1.097		0.938	1.126		1.144	0.996
Q3UZP4	Small VCP/p97-interacting protein OS=Mus musculus OX=10090 GN=Svip PE=3 SV=1	Svip	8.3635		1.068			0.912			1.037
Q9QY81	Nuclear pore membrane glycoprotein 210 OS=Mus musculus OX=10090 GN=Nup210 PE=1 SV=2	Nup210	204.1	0.968	0.988	0.95	1.123	1.092	1.076	1.044	1.097	1.07
Q8VE80	THO complex subunit 3 OS=Mus musculus OX=10090 GN=Thoc3 PE=2 SV=1	Thoc3	38.737	1.067	1.005	1.017	1.103	1.027	1.02	0.977	0.972	0.987
Q9D0U9	Protein ARV1 OS=Mus musculus OX=10090 GN=Arv1 PE=2 SV=1	Arv1	30.534
Q9WTZ2	Membrane-bound transcription factor site-1 protease OS=Mus musculus OX=10090 GN=Mbtps1 PE=1 SV=1	Mbtps1	117.46
Q6WKZ8	E3 ubiquitin-protein ligase UBR2 OS=Mus musculus OX=10090 GN=Ubr2 PE=1 SV=2	Ubr2	199.15		0.946	1.084		1.02	1.076		0.982	1.078
Q9D0I9	Arginine--tRNA ligase, cytoplasmic OS=Mus musculus OX=10090 GN=Rars PE=1 SV=2	Rars	75.673	0.97	0.994	1.007	0.975	0.991	0.958	0.946	0.936	0.945
Q91V01	Lysophospholipid acyltransferase 5 OS=Mus musculus OX=10090 GN=Lpcat3 PE=1 SV=1	Lpcat3	56.146	0.849	0.851	0.847	1.093	1.058	1.094	1.209	0.99	0.964
Q9CWZ3	RNA-binding protein 8A OS=Mus musculus OX=10090 GN=Rbm8a PE=1 SV=4	Rbm8a	19.889	0.999	1.048	1.059	0.941	0.942	0.899	0.916	0.91	0.923
Q8BIZ6	Smad nuclear-interacting protein 1 OS=Mus musculus OX=10090 GN=Snip1 PE=1 SV=1	Snip1	44.415
P97825	Jupiter microtubule associated homolog 1 OS=Mus musculus OX=10090 GN=Jpt1 PE=1 SV=3	Jpt1	16.08	1.083	1.131	1.094	0.947	0.933	0.937	1.041	1.067	0.983
Q6ZWY8	Thymosin beta-10 OS=Mus musculus OX=10090 GN=Tmsb10 PE=1 SV=3	Tmsb10	5.0256
O70355	Butyrophilin-like protein 2 OS=Mus musculus OX=10090 GN=Btnl2 PE=2 SV=2	Btnl2	50.894			0.742			0.933			1.329
O08739	AMP deaminase 3 OS=Mus musculus OX=10090 GN=Ampd3 PE=1 SV=2	Ampd3	88.651	1.057	0.929	0.881	1.357	1.112	1.05	1.249	1.358	1.132
O35704	Serine palmitoyltransferase 1 OS=Mus musculus OX=10090 GN=Sptlc1 PE=1 SV=2	Sptlc1	52.534	0.98	1.04	0.998	1.115	1.091	1.074	1.063	1.051	1.042
Q9D198	Pre-mRNA-splicing factor SYF2 OS=Mus musculus OX=10090 GN=Syf2 PE=2 SV=1	Syf2	28.712
Q9CR64	Protein kish-A OS=Mus musculus OX=10090 GN=Tmem167a PE=1 SV=1	Tmem167a	8.0738
P70279	Surfeit locus protein 6 OS=Mus musculus OX=10090 GN=Surf6 PE=1 SV=1	Surf6	41.234	1.07	1.08	0.961	0.95	1.107	0.962	1.033	1.143	0.939
Q6PCN7	Helicase-like transcription factor OS=Mus musculus OX=10090 GN=Hltf PE=1 SV=1	Hltf	113.32	0.955		1.016	1.16		0.979	1.095		1.058
Q6X893	Choline transporter-like protein 1 OS=Mus musculus OX=10090 GN=Slc44a1 PE=1 SV=3	Slc44a1	73.066		0.937	0.976		1.153	0.998		0.923	1.043
Q9Z1R4	Uncharacterized protein C6orf47 homolog OS=Mus musculus OX=10090 GN=D17h6s53e PE=1 SV=1	D17h6s53e	32.014	1.008	1.031	0.947	0.778	0.986	0.789	0.875	1.186	1.055
O35435	Dihydroorotate dehydrogenase (quinone), mitochondrial OS=Mus musculus OX=10090 GN=Dhodh PE=1 SV=2	Dhodh	42.699	0.939	1	0.918	1.046	1.025	0.983	1	1.015	0.923
Q61029	Lamina-associated polypeptide 2, isoforms beta/delta/epsilon/gamma OS=Mus musculus OX=10090 GN=Tmpo PE=1 SV=4	Tmpo	50.372	1.031	1.053	1.029	0.833	0.905	0.966	0.807	0.935	0.906
Q80Y55	BSD domain-containing protein 1 OS=Mus musculus OX=10090 GN=Bsdc1 PE=1 SV=1	Bsdc1	46.952	1.022	1.002	1.014	0.86	1.051	1.019	1.058	1.11	1.035
Q8CJ61	CKLF-like MARVEL transmembrane domain-containing protein 4 OS=Mus musculus OX=10090 GN=Cmtm4 PE=1 SV=1	Cmtm4	22.921	1.077	1.028	0.963	1.248	1.095	1.109	1.29	1.133	1.085
Q921F2	TAR DNA-binding protein 43 OS=Mus musculus OX=10090 GN=Tardbp PE=1 SV=1	Tardbp	44.547	1.045	1.029	1.01	1.144	1.079	1.117	1.073	1.065	0.984
P97364	Selenide, water dikinase 2 OS=Mus musculus OX=10090 GN=Sephs2 PE=1 SV=3	Sephs2	47.833	0.906	0.896		0.807	0.73		0.839	0.785
Q6PGL7	WASH complex subunit 2 OS=Mus musculus OX=10090 GN=Washc2 PE=1 SV=1	Washc2	145.31
Q80YD1	ATP-dependent RNA helicase SUPV3L1, mitochondrial OS=Mus musculus OX=10090 GN=Supv3l1 PE=1 SV=1	Supv3l1	87.004	1.023	0.962	1.001	1.027	0.946	1.126	1.052	1.154	1.003
P70671	Interferon regulatory factor 3 OS=Mus musculus OX=10090 GN=Irf3 PE=1 SV=1	Irf3	46.852	1.024	1.109	0.979	0.881	1.017	0.875	0.926	1.039	0.895
Q99KX1	Myeloid leukemia factor 2 OS=Mus musculus OX=10090 GN=Mlf2 PE=1 SV=1	Mlf2	28.055	1.07	0.856	1.077	1.062	1.021	1.163	1.023	1.14	1.066
P26450	Phosphatidylinositol 3-kinase regulatory subunit alpha OS=Mus musculus OX=10090 GN=Pik3r1 PE=1 SV=2	Pik3r1	83.516			0.961			0.909			0.892
P35979	60S ribosomal protein L12 OS=Mus musculus OX=10090 GN=Rpl12 PE=1 SV=2	Rpl12	17.804	1.051	1.045	1.079	1.088	0.969	0.997	1.031	1.018	1.035
P10630	Eukaryotic initiation factor 4A-II OS=Mus musculus OX=10090 GN=Eif4a2 PE=1 SV=2	Eif4a2	46.402	0.922	0.921	0.853	0.957	0.886	0.972	0.892	0.874	0.81
Q8K1X4	Nck-associated protein 1-like OS=Mus musculus OX=10090 GN=Nckap1l PE=1 SV=1	Nckap1l	128.9
Q61206	Platelet-activating factor acetylhydrolase IB subunit beta OS=Mus musculus OX=10090 GN=Pafah1b2 PE=1 SV=2	Pafah1b2	25.581	1.007	1.039	0.975	0.828	0.853	0.893	0.838	0.821	0.951
Q9JKA5	Cell surface A33 antigen OS=Mus musculus OX=10090 GN=Gpa33 PE=2 SV=2	Gpa33	35.692	0.928	0.933	0.874	1.059	1.028	0.952	1.042	0.966	1.408
Q9JKP5	Muscleblind-like protein 1 OS=Mus musculus OX=10090 GN=Mbnl1 PE=1 SV=1	Mbnl1	36.975	0.784	0.788	0.843	0.962	0.921	1.023	1.188	1.269	1.248
Q8BVE3	V-type proton ATPase subunit H OS=Mus musculus OX=10090 GN=Atp6v1h PE=1 SV=1	Atp6v1h	55.854	1.059	1.011	1.094	1.031	0.985	0.924	1.007	0.988	0.924
Q80UK0	SEC14 domain and spectrin repeat-containing protein 1 OS=Mus musculus OX=10090 GN=Sestd1 PE=1 SV=1	Sestd1	79.375			0.68			0.851			1.977
Q8BRH3	Rho GTPase-activating protein 19 OS=Mus musculus OX=10090 GN=Arhgap19 PE=1 SV=2	Arhgap19	55.733			0.972			1.28			1.19
O89112	LanC-like protein 1 OS=Mus musculus OX=10090 GN=Lancl1 PE=1 SV=1	Lancl1	45.341		1.021	1.009		0.943	1.044		1.035	1.065
Q60722	Transcription factor 4 OS=Mus musculus OX=10090 GN=Tcf4 PE=1 SV=1	Tcf4	71.624	0.829		0.766	1.09		1.015	1.135		1.119
Q03160	Growth factor receptor-bound protein 7 OS=Mus musculus OX=10090 GN=Grb7 PE=1 SV=1	Grb7	59.959	0.925	0.823	0.975	0.872	0.816	0.949	0.959	1.036	1.013
Q3TCN2	Putative phospholipase B-like 2 OS=Mus musculus OX=10090 GN=Plbd2 PE=1 SV=2	Plbd2	66.289	1.154	1.022	0.959	0.874	0.906	0.935	1.027	0.995	1.119
P12710	Fatty acid-binding protein, liver OS=Mus musculus OX=10090 GN=Fabp1 PE=1 SV=2	Fabp1	14.245	0.64	0.653	0.667	0.495	0.452	0.521	0.554	0.521	0.567
P97480	Eyes absent homolog 3 OS=Mus musculus OX=10090 GN=Eya3 PE=1 SV=2	Eya3	55.973			0.901			1.074			1.094
Q8C142	Low density lipoprotein receptor adapter protein 1 OS=Mus musculus OX=10090 GN=Ldlrap1 PE=1 SV=3	Ldlrap1	33.975
Q09143	High affinity cationic amino acid transporter 1 OS=Mus musculus OX=10090 GN=Slc7a1 PE=1 SV=1	Slc7a1	67.091	1.115	1.056	1.091	1.135	1.11	1.098	1.168	1.146	1.166
Q9CQF8	Ribosomal protein 63, mitochondrial OS=Mus musculus OX=10090 GN=Mrpl57 PE=1 SV=1	Mrpl57	11.952	0.962	1.011		0.996	1.015		0.97	0.93
Q571J5	Zinc finger protein 354C OS=Mus musculus OX=10090 GN=Znf354c PE=2 SV=2	Znf354c	64.064	0.909			0.901			0.809
P46718	Programmed cell death protein 2 OS=Mus musculus OX=10090 GN=Pdcd2 PE=2 SV=2	Pdcd2	38.341	1.013	1.135		1.067	1.108		0.966	1.014
Q62452	UDP-glucuronosyltransferase 1-9 OS=Mus musculus OX=10090 GN=Ugt1a9 PE=1 SV=3	Ugt1a9	60.007	0.74	0.769	0.523	0.961	0.865	0.893	1.069	1.086	1.149
P58069	Ras GTPase-activating protein 2 OS=Mus musculus OX=10090 GN=Rasa2 PE=1 SV=2	Rasa2	96.4	0.987			1.072			1.083
Q5U4D8	Sodium-dependent multivitamin transporter OS=Mus musculus OX=10090 GN=Slc5a6 PE=1 SV=2	Slc5a6	68.51		1.042			1.142			1.081
Q69ZR2	E3 ubiquitin-protein ligase HECTD1 OS=Mus musculus OX=10090 GN=Hectd1 PE=1 SV=2	Hectd1	290.08		1.065	0.94		0.963	1.449		1.007	1.108
Q9Z0G0	PDZ domain-containing protein GIPC1 OS=Mus musculus OX=10090 GN=Gipc1 PE=1 SV=1	Gipc1	36.129	1.041	1.06	1.029	1.183	0.92	1.052	1.219	0.978	0.962
Q9DC61	Mitochondrial-processing peptidase subunit alpha OS=Mus musculus OX=10090 GN=Pmpca PE=1 SV=1	Pmpca	58.278	0.976	1.008	0.969	1.047	0.97	1.039	1.103	1.071	1.028
Q8VI33	Transcription initiation factor TFIID subunit 9 OS=Mus musculus OX=10090 GN=Taf9 PE=1 SV=1	Taf9	28.979	1.061	0.926	0.956	0.983	1.058	1.018	0.942	0.946	0.93
A6H5Z3	Exocyst complex component 6B OS=Mus musculus OX=10090 GN=Exoc6b PE=1 SV=1	Exoc6b	94.128		1.226	1.07		1.141	1.139		1.147	1.021
Q99JP4	Anaphase-promoting complex subunit CDC26 OS=Mus musculus OX=10090 GN=Cdc26 PE=1 SV=1	Cdc26	9.7608		1.173			1.224			1.293
Q3UKC1	Tax1-binding protein 1 homolog OS=Mus musculus OX=10090 GN=Tax1bp1 PE=1 SV=2	Tax1bp1	93.629	1.041	0.911	1.045	1.273	1.167	1.287	1.149	1.181	1.176
Q9ESN6	Tripartite motif-containing protein 2 OS=Mus musculus OX=10090 GN=Trim2 PE=1 SV=1	Trim2	81.444	0.996	0.987	0.993	0.92	0.989	0.818	0.919	0.905	0.835
P60824	Cold-inducible RNA-binding protein OS=Mus musculus OX=10090 GN=Cirbp PE=1 SV=1	Cirbp	18.607			0.968			0.929			0.901
Q3UJU9	Regulator of microtubule dynamics protein 3 OS=Mus musculus OX=10090 GN=Rmdn3 PE=1 SV=2	Rmdn3	52.028	0.964	1	0.964	1.003	0.992	0.98	1.016	0.952	1.015
P10649	Glutathione S-transferase Mu 1 OS=Mus musculus OX=10090 GN=Gstm1 PE=1 SV=2	Gstm1	25.97	0.819	0.855	0.839	0.69	0.736	0.659	0.719	0.792	0.746
Q8K215	LYR motif-containing protein 4 OS=Mus musculus OX=10090 GN=Lyrm4 PE=1 SV=1	Lyrm4	10.854	0.964	0.995	0.973	0.943	0.924	0.829	1.084	0.989	0.957
Q60631	Growth factor receptor-bound protein 2 OS=Mus musculus OX=10090 GN=Grb2 PE=1 SV=1	Grb2	25.238	1.104	1.099	1.084	0.998	1.006	1.033	1.078	1.053	1.114
O88456	Calpain small subunit 1 OS=Mus musculus OX=10090 GN=Capns1 PE=1 SV=1	Capns1	28.463	1.044	1.03	1.015	1.071	0.955	1.024	1.029	0.958	1.081
Q571I9	Aldehyde dehydrogenase family 16 member A1 OS=Mus musculus OX=10090 GN=Aldh16a1 PE=1 SV=2	Aldh16a1	84.755	0.948	0.94	0.927	0.973	0.96	1.002	0.954	0.901	0.936
O35615	Zinc finger protein ZFPM1 OS=Mus musculus OX=10090 GN=Zfpm1 PE=1 SV=1	Zfpm1	105.98	1.054	0.961	1.109	0.981	1.098	1.104	1.138	0.978	1.479
Q8K0P3	TLD domain-containing protein 1 OS=Mus musculus OX=10090 GN=Tldc1 PE=2 SV=1	Tldc1	50.844
Q921L5	Conserved oligomeric Golgi complex subunit 2 OS=Mus musculus OX=10090 GN=Cog2 PE=1 SV=2	Cog2	82.039		0.902			1.144			1.063
Q3UGS4	Mapk-regulated corepressor-interacting protein 1 OS=Mus musculus OX=10090 GN=Mcrip1 PE=1 SV=1	Mcrip1	11.101	1.366	0.848	0.672	1.267	0.868	0.746	1.375	1.189	1.234
Q8BGU5	Cyclin-Y OS=Mus musculus OX=10090 GN=Ccny PE=1 SV=1	Ccny	39.394		0.967	0.995		0.999	0.958		1.1	0.848
Q8VDF2	E3 ubiquitin-protein ligase UHRF1 OS=Mus musculus OX=10090 GN=Uhrf1 PE=1 SV=2	Uhrf1	88.303	1.089	1.078	1.036	1.011	1.02	0.984	1.05	1.11	1.208
Q8BGB8	Ubiquinone biosynthesis protein COQ4 homolog, mitochondrial OS=Mus musculus OX=10090 GN=Coq4 PE=1 SV=1	Coq4	30.084	0.999	0.93		1.029	1.038		1.059	0.921
B1AVY7	Kinesin-like protein KIF16B OS=Mus musculus OX=10090 GN=Kif16b PE=1 SV=1	Kif16b	150.06		0.864			1.119			1.203
Q8VCA8	Secernin-2 OS=Mus musculus OX=10090 GN=Scrn2 PE=1 SV=1	Scrn2	46.6	0.975	0.955	0.961	0.959	1.014	0.779	0.986	0.994	0.794
Q9CQ80	Vacuolar protein-sorting-associated protein 25 OS=Mus musculus OX=10090 GN=Vps25 PE=1 SV=1	Vps25	20.747	0.944	0.958	0.977	0.959	0.964	0.879	1.035	1.142	0.878
Q9WTX5	S-phase kinase-associated protein 1 OS=Mus musculus OX=10090 GN=Skp1 PE=1 SV=3	Skp1	18.672	1.089	1.079	1.077	0.934	1.002	0.92	0.975	0.893	0.869
P52927	High mobility group protein HMGI-C OS=Mus musculus OX=10090 GN=Hmga2 PE=1 SV=1	Hmga2	11.819	1.161	0.92	0.946	1.072	1.086	1.097	1.01	0.873	0.883
P62702	40S ribosomal protein S4, X isoform OS=Mus musculus OX=10090 GN=Rps4x PE=1 SV=2	Rps4x	29.597	1.025	1.014	1.007	1.098	1.09	1.109	1.051	1.03	1.04
Q9CXJ1	Probable glutamate--tRNA ligase, mitochondrial OS=Mus musculus OX=10090 GN=Ears2 PE=1 SV=1	Ears2	58.326	0.98	0.95	0.98	0.981	1.057	0.962	0.988	1.057	1.033
Q3V1M1	Immunoglobulin superfamily member 10 OS=Mus musculus OX=10090 GN=Igsf10 PE=2 SV=2	Igsf10	285.59	1.1			1.153			1.176
Q9DAR7	m7GpppX diphosphatase OS=Mus musculus OX=10090 GN=Dcps PE=1 SV=1	Dcps	38.988	1.022	0.995	0.956	0.798	0.766	0.791	0.861	0.826	0.91
Q99KQ4	Nicotinamide phosphoribosyltransferase OS=Mus musculus OX=10090 GN=Nampt PE=1 SV=1	Nampt	55.446	0.975	0.965	0.963	0.823	0.829	0.75	0.758	0.809	0.81
Q9Z0M5	Lysosomal acid lipase/cholesteryl ester hydrolase OS=Mus musculus OX=10090 GN=Lipa PE=1 SV=2	Lipa	45.325	0.951	0.925	0.986	0.953	0.948	0.906	1.006	1.012	1.058
O54962	Barrier-to-autointegration factor OS=Mus musculus OX=10090 GN=Banf1 PE=1 SV=1	Banf1	10.102	0.916	0.908	0.904	1.15	1.061	1.068	0.975	0.924	0.892
Q3U381	Zinc finger protein 692 OS=Mus musculus OX=10090 GN=Znf692 PE=2 SV=1	Znf692	59.01
Q5NCF2	Trafficking protein particle complex subunit 1 OS=Mus musculus OX=10090 GN=Trappc1 PE=1 SV=1	Trappc1	16.881		0.966	1.041		1.17	1.092		0.866	1.113
Q6PGH1	Protein BUD31 homolog OS=Mus musculus OX=10090 GN=Bud31 PE=1 SV=2	Bud31	17	1.071	0.989	1.096	0.984	0.958	0.862	0.865	0.985	0.966
Q3UMU9	Hepatoma-derived growth factor-related protein 2 OS=Mus musculus OX=10090 GN=Hdgfl2 PE=1 SV=1	Hdgfl2	74.29	0.937	0.896	0.844	0.935	0.884	0.796	1.262	1.154	1.131
Q9JKN1	Zinc transporter 7 OS=Mus musculus OX=10090 GN=Slc30a7 PE=1 SV=1	Slc30a7	41.789	0.954	1.029	0.983	1.132	1.383	1.166	1.031	1.273	1.167
Q9DCW4	Electron transfer flavoprotein subunit beta OS=Mus musculus OX=10090 GN=Etfb PE=1 SV=3	Etfb	27.623	0.927	0.918	0.913	1	0.981	1.023	1.042	1.006	1.034
P43241	Homeobox protein CDX-2 OS=Mus musculus OX=10090 GN=Cdx2 PE=1 SV=1	Cdx2	33.476			1.005			1			1.061
P60840	Alpha-endosulfine OS=Mus musculus OX=10090 GN=Ensa PE=1 SV=1	Ensa	13.335
Q9JJU8	SH3 domain-binding glutamic acid-rich-like protein OS=Mus musculus OX=10090 GN=Sh3bgrl PE=1 SV=1	Sh3bgrl	12.811	0.871	0.887	0.843	0.63	0.685	0.714	0.674	0.689	0.714
Q0GNC1	Inverted formin-2 OS=Mus musculus OX=10090 GN=Inf2 PE=1 SV=1	Inf2	138.56			1.16			1.236			1.085
Q8BIJ6	Isoleucine--tRNA ligase, mitochondrial OS=Mus musculus OX=10090 GN=Iars2 PE=1 SV=1	Iars2	112.8	0.981	0.964	0.914	0.951	0.936	0.972	0.942	0.929	0.96
Q8R5J9	PRA1 family protein 3 OS=Mus musculus OX=10090 GN=Arl6ip5 PE=1 SV=2	Arl6ip5	21.557	0.912			1.12			0.905
Q91YP3	Deoxyribose-phosphate aldolase OS=Mus musculus OX=10090 GN=Dera PE=1 SV=1	Dera	34.975	0.931	0.942	0.903	0.933	0.904	0.954	0.93	0.946	1.002
Q9D6J3	YJU2 splicing factor homolog OS=Mus musculus OX=10090 GN=Yju2 PE=1 SV=1	Yju2	35.988		1.004			1.047			0.993
P24452	Macrophage-capping protein OS=Mus musculus OX=10090 GN=Capg PE=1 SV=2	Capg	39.24
P60469	Liprin-alpha-3 OS=Mus musculus OX=10090 GN=Ppfia3 PE=1 SV=2	Ppfia3	133.42
Q8CI33	CWF19-like protein 1 OS=Mus musculus OX=10090 GN=Cwf19l1 PE=1 SV=2	Cwf19l1	60.193	1.076	1.043	1.046	0.944	0.895	0.918	0.927	0.91	0.976
O09000	Nuclear receptor coactivator 3 OS=Mus musculus OX=10090 GN=Ncoa3 PE=1 SV=2	Ncoa3	151.57
Q6NVE8	WD repeat-containing protein 44 OS=Mus musculus OX=10090 GN=Wdr44 PE=1 SV=1	Wdr44	101.55			1.012			1.172			0.981
Q9Z127	Large neutral amino acids transporter small subunit 1 OS=Mus musculus OX=10090 GN=Slc7a5 PE=1 SV=2	Slc7a5	55.872		1.078			1.084			1.119
Q8BHG2	UPF0587 protein C1orf123 homolog OS=Mus musculus OX=10090 PE=1 SV=1	---	18.02	0.994	1.032	1.033	0.709	0.804	0.837	0.956	0.87	0.773
Q9DBP5	UMP-CMP kinase OS=Mus musculus OX=10090 GN=Cmpk1 PE=1 SV=1	Cmpk1	22.165	0.992	0.998	0.986	0.896	0.898	0.909	0.88	0.869	0.865
Q9Z0P5	Twinfilin-2 OS=Mus musculus OX=10090 GN=Twf2 PE=1 SV=1	Twf2	39.47	1.115	1.063		1.078	1.034		1.142	1.093
Q5SWW4	Mediator of RNA polymerase II transcription subunit 13 OS=Mus musculus OX=10090 GN=Med13 PE=1 SV=1	Med13	238.59	0.853			0.797			0.932
Q8K0C5	Zymogen granule membrane protein 16 OS=Mus musculus OX=10090 GN=Zg16 PE=1 SV=1	Zg16	18.209	0.58	0.703	0.633	0.99	0.922	0.923	0.859	0.868	0.79
Q9JI78	Peptide-N(4)-(N-acetyl-beta-glucosaminyl)asparagine amidase OS=Mus musculus OX=10090 GN=Ngly1 PE=1 SV=2	Ngly1	74.274		0.923	1.005		0.912	0.997		1.001	1.034
Q810J8	Zinc finger FYVE domain-containing protein 1 OS=Mus musculus OX=10090 GN=Zfyve1 PE=1 SV=2	Zfyve1	86.939	0.887			1.068			1.065
Q08122	Transducin-like enhancer protein 3 OS=Mus musculus OX=10090 GN=Tle3 PE=1 SV=3	Tle3	83.446	0.989	0.977	0.872	1.004	0.913	0.886	1.04	1.027	1.375
Q8BIW9	Chromosome transmission fidelity protein 18 homolog OS=Mus musculus OX=10090 GN=Chtf18 PE=1 SV=2	Chtf18	108.14	0.915	0.959		1.098	1.216		1.176	1.236
Q8BJ37	Tyrosyl-DNA phosphodiesterase 1 OS=Mus musculus OX=10090 GN=Tdp1 PE=1 SV=2	Tdp1	68.689
Q8R107	PRELI domain-containing protein 1, mitochondrial OS=Mus musculus OX=10090 GN=Prelid1 PE=1 SV=1	Prelid1	24.959		1.005	1.176		1.069	1.287		1.471	1.191
Q8VCC1	15-hydroxyprostaglandin dehydrogenase [NAD(+)] OS=Mus musculus OX=10090 GN=Hpgd PE=1 SV=1	Hpgd	29.18
Q9CWU4	UPF0690 protein C1orf52 homolog OS=Mus musculus OX=10090 PE=1 SV=1	---	20.101		0.756	0.969		0.943	1.058		1.716	1.472
Q91W45	Polyadenylate-binding protein-interacting protein 2B OS=Mus musculus OX=10090 GN=Paip2b PE=1 SV=2	Paip2b	15.472		1.138			0.929			0.968
Q8CB44	GRAM domain-containing protein 4 OS=Mus musculus OX=10090 GN=Gramd4 PE=1 SV=1	Gramd4	72.263	0.574			4.343			0.772
Q80YQ8	Protein RMD5 homolog A OS=Mus musculus OX=10090 GN=Rmnd5a PE=1 SV=2	Rmnd5a	43.992		1.125	1.088		1.072	1.214		1.07	1.062
Q9QXG4	Acetyl-coenzyme A synthetase, cytoplasmic OS=Mus musculus OX=10090 GN=Acss2 PE=1 SV=2	Acss2	78.861	0.942	0.961	0.946	0.886	0.918	0.891	0.753	0.902	0.935
Q9R207	Nibrin OS=Mus musculus OX=10090 GN=Nbn PE=1 SV=1	Nbn	83.794		1.031			0.997			1.086
Q9EPL4	Methyltransferase-like protein 9 OS=Mus musculus OX=10090 GN=Mettl9 PE=1 SV=1	Mettl9	36.426
P35700	Peroxiredoxin-1 OS=Mus musculus OX=10090 GN=Prdx1 PE=1 SV=1	Prdx1	22.176	0.931	0.938	0.927	0.928	0.889	0.89	0.86	0.8	0.838
Q80ZQ9	Protein Simiate OS=Mus musculus OX=10090 GN=Fam206a PE=1 SV=2	Fam206a	21.597		1.066	1.043		1.083	1.031		1.162	1.09
Q8R3Y8	Interferon regulatory factor 2-binding protein 1 OS=Mus musculus OX=10090 GN=Irf2bp1 PE=1 SV=2	Irf2bp1	61.75	0.922	0.944	0.873	0.912	0.772	0.845	0.937	0.946	0.965
Q8K1Y2	Serine/threonine-protein kinase D3 OS=Mus musculus OX=10090 GN=Prkd3 PE=1 SV=1	Prkd3	100.08
Q91VN4	MICOS complex subunit Mic25 OS=Mus musculus OX=10090 GN=Chchd6 PE=1 SV=2	Chchd6	29.852		0.894			1.065			1.092
Q8K1I7	WAS/WASL-interacting protein family member 1 OS=Mus musculus OX=10090 GN=Wipf1 PE=1 SV=1	Wipf1	50.08
P56546	C-terminal-binding protein 2 OS=Mus musculus OX=10090 GN=Ctbp2 PE=1 SV=2	Ctbp2	48.956	1.141	1.011	0.806	0.995	0.908	1.114	1.11	1.012	1.097
Q8VDS4	Regulation of nuclear pre-mRNA domain-containing protein 1A OS=Mus musculus OX=10090 GN=Rprd1a PE=1 SV=1	Rprd1a	35.7	0.976	0.931	1.005	0.783	0.879	0.835	0.859	0.878	0.836
Q91WG5	5'-AMP-activated protein kinase subunit gamma-2 OS=Mus musculus OX=10090 GN=Prkag2 PE=1 SV=2	Prkag2	62.948	0.966		0.951	0.96		1.05	1.014		1.088
Q8R001	Microtubule-associated protein RP/EB family member 2 OS=Mus musculus OX=10090 GN=Mapre2 PE=1 SV=1	Mapre2	36.946	0.922	0.986	0.961	1.062	1.035	1.108	0.995	0.984	0.975
Q8C0D4	Rho GTPase-activating protein 12 OS=Mus musculus OX=10090 GN=Arhgap12 PE=1 SV=2	Arhgap12	95.351		1.055			0.942			1.037
Q9D850	Transmembrane protein 68 OS=Mus musculus OX=10090 GN=Tmem68 PE=2 SV=1	Tmem68	37.81
Q9WV54	Acid ceramidase OS=Mus musculus OX=10090 GN=Asah1 PE=1 SV=1	Asah1	44.669	1.033	0.975	1.032	1.213	1.162	1.241	0.91	0.964	0.961
P62317	Small nuclear ribonucleoprotein Sm D2 OS=Mus musculus OX=10090 GN=Snrpd2 PE=1 SV=1	Snrpd2	13.527	1.048	1.065	1.036	1.017	0.997	0.981	0.977	0.937	0.926
Q9WTS2	Alpha-(1,6)-fucosyltransferase OS=Mus musculus OX=10090 GN=Fut8 PE=1 SV=2	Fut8	66.556	0.996	0.918	0.948	1.07	1.059	1.117	1.026	1.015	1.035
P46978	Dolichyl-diphosphooligosaccharide--protein glycosyltransferase subunit STT3A OS=Mus musculus OX=10090 GN=Stt3a PE=1 SV=1	Stt3a	80.597	0.899	0.913	0.916	1.186	1.161	1.143	1.148	1.094	1.126
Q9DC70	NADH dehydrogenase [ubiquinone] iron-sulfur protein 7, mitochondrial OS=Mus musculus OX=10090 GN=Ndufs7 PE=1 SV=1	Ndufs7	24.683	0.925	0.928	0.869	1.11	1.094	1.114	1.095	1.059	1.07
Q8C166	Copine-1 OS=Mus musculus OX=10090 GN=Cpne1 PE=1 SV=1	Cpne1	58.886	1.016	1.028	0.99	1.131	1.165	1.157	1.013	1.044	1.067
O08848	60 kDa SS-A/Ro ribonucleoprotein OS=Mus musculus OX=10090 GN=Trove2 PE=1 SV=1	Trove2	60.123	0.952			1.005			1.065
Q6VGS5	Protein Daple OS=Mus musculus OX=10090 GN=Ccdc88c PE=1 SV=1	Ccdc88c	226.53	0.704	0.823	1.041	0.812	0.941	1.128	1.249	1.041	1.068
P05202	Aspartate aminotransferase, mitochondrial OS=Mus musculus OX=10090 GN=Got2 PE=1 SV=1	Got2	47.411	1.037	1.001	1.002	0.838	0.872	0.862	0.969	1.002	0.982
Q9D1F4	Proline-rich AKT1 substrate 1 OS=Mus musculus OX=10090 GN=Akt1s1 PE=1 SV=1	Akt1s1	27.483	1.051	0.981		0.979	0.926		0.974	1.155
Q8VDQ1	Prostaglandin reductase 2 OS=Mus musculus OX=10090 GN=Ptgr2 PE=1 SV=2	Ptgr2	38.015	0.833	0.884	0.844	0.698	0.78	0.736	0.801	0.809	0.677
Q9D820	Prolyl-tRNA synthetase associated domain-containing protein 1 OS=Mus musculus OX=10090 GN=Prorsd1 PE=1 SV=1	Prorsd1	18.862	1.04	1.092		0.894	1		1.052	1.008
Q8BTS4	Nuclear pore complex protein Nup54 OS=Mus musculus OX=10090 GN=Nup54 PE=1 SV=1	Nup54	55.731	1.034	1.096	1.07	1.014	1.188	0.985	0.967	1.159	1.102
Q9ESX5	H/ACA ribonucleoprotein complex subunit DKC1 OS=Mus musculus OX=10090 GN=Dkc1 PE=1 SV=4	Dkc1	57.401	0.99	1.004	0.991	1.064	1.095	1.091	1.082	1.009	1.063
Q6WVG3	BTB/POZ domain-containing protein KCTD12 OS=Mus musculus OX=10090 GN=Kctd12 PE=1 SV=1	Kctd12	35.892			0.989			1.286			1.08
P30051	Transcriptional enhancer factor TEF-1 OS=Mus musculus OX=10090 GN=Tead1 PE=1 SV=2	Tead1	47.947	1.008			1.028			1.046
Q8CGK3	Lon protease homolog, mitochondrial OS=Mus musculus OX=10090 GN=Lonp1 PE=1 SV=2	Lonp1	105.84	0.975	0.97	0.954	1.025	1.055	1.047	1.014	0.998	1.002
Q8C7X2	ER membrane protein complex subunit 1 OS=Mus musculus OX=10090 GN=Emc1 PE=1 SV=1	Emc1	111.6	0.909	0.965	0.97	1.247	1.112	1.163	1.133	1.159	1.066
Q9JIZ0	Probable N-acetyltransferase CML1 OS=Mus musculus OX=10090 GN=Cml1 PE=1 SV=1	Cml1	25.013
Q8R2Z5	von Willebrand factor A domain-containing protein 1 OS=Mus musculus OX=10090 GN=Vwa1 PE=1 SV=1	Vwa1	44.708			1.324			1.693			1.588
Q9D666	SUN domain-containing protein 1 OS=Mus musculus OX=10090 GN=Sun1 PE=1 SV=2	Sun1	101.98	0.942	0.935		1.012	1.36		1.089	1.074
A2AJI0	MAP7 domain-containing protein 1 OS=Mus musculus OX=10090 GN=Map7d1 PE=1 SV=1	Map7d1	93.275		1.233			1.138			1.341
Q9WTX2	Interferon-inducible double-stranded RNA-dependent protein kinase activator A OS=Mus musculus OX=10090 GN=Prkra PE=1 SV=1	Prkra	34.371	0.968	0.911	0.919	0.956	1.015	0.934	0.99	0.908	0.974
Q6PFQ7	Ras GTPase-activating protein 4 OS=Mus musculus OX=10090 GN=Rasa4 PE=1 SV=1	Rasa4	90.059		1.151			0.963			1.066
Q68FL6	Methionine--tRNA ligase, cytoplasmic OS=Mus musculus OX=10090 GN=Mars PE=1 SV=1	Mars	101.43	1.019	1.027	1.053	1.055	1.045	1.088	1.012	0.999	0.997
Q3U9G9	Lamin-B receptor OS=Mus musculus OX=10090 GN=Lbr PE=1 SV=2	Lbr	71.439	1.042	0.987	1.003	0.933	0.981	0.985	0.892	0.922	0.916
P14115	60S ribosomal protein L27a OS=Mus musculus OX=10090 GN=Rpl27a PE=1 SV=5	Rpl27a	16.605	1.045	1.018	1.024	1.021	1.05	1.051	1.07	1.129	1.05
Q8BN78	Transcriptional regulator Kaiso OS=Mus musculus OX=10090 GN=Zbtb33 PE=1 SV=1	Zbtb33	74.049	0.966		1.091	0.81		0.933	0.84		0.866
Q8BRK8	5'-AMP-activated protein kinase catalytic subunit alpha-2 OS=Mus musculus OX=10090 GN=Prkaa2 PE=1 SV=3	Prkaa2	62.022		1.03	0.969		1.23	1.343		1.167	1.129
P56183	Ribosomal RNA processing protein 1 homolog A OS=Mus musculus OX=10090 GN=Rrp1 PE=1 SV=2	Rrp1	54.776	0.957	1.028	1.032	1.155	1.045	1.087	1.133	1.198	1.159
Q923B1	Lariat debranching enzyme OS=Mus musculus OX=10090 GN=Dbr1 PE=1 SV=2	Dbr1	62.289			1.004			0.89			1.021
Q920D3	Mediator of RNA polymerase II transcription subunit 28 OS=Mus musculus OX=10090 GN=Med28 PE=1 SV=2	Med28	19.538
E9PW74	GTPase IMAP family member GIMD1 OS=Mus musculus OX=10090 GN=Gimd1 PE=1 SV=1	Gimd1	24.218		0.688			1.174			1.493
Q8VCS6	Mediator of RNA polymerase II transcription subunit 9 OS=Mus musculus OX=10090 GN=Med9 PE=2 SV=1	Med9	15.709	1.06	1.183	0.952	0.903	0.977	1.04	1.087	1.024	0.937
O09172	Glutamate--cysteine ligase regulatory subunit OS=Mus musculus OX=10090 GN=Gclm PE=1 SV=1	Gclm	30.534	1.024	0.956	0.957	0.979	0.908	0.965	1.007	1.06	0.891
Q9CZJ1	Probable U3 small nucleolar RNA-associated protein 11 OS=Mus musculus OX=10090 GN=Utp11 PE=2 SV=1	Utp11	30.55	1.06	1.079	1.053	1.054	1.113	1	1.126	1.117	1.038
Q80SZ7	Guanine nucleotide-binding protein G(I)/G(S)/G(O) subunit gamma-5 OS=Mus musculus OX=10090 GN=Gng5 PE=1 SV=2	Gng5	7.3184	1.074	1.11	1.116	0.996	1.045	1.098	1.021	0.986	0.955
Q80XC3	USP6 N-terminal-like protein OS=Mus musculus OX=10090 GN=Usp6nl PE=1 SV=2	Usp6nl	93.572
P54763	Ephrin type-B receptor 2 OS=Mus musculus OX=10090 GN=Ephb2 PE=1 SV=3	Ephb2	109.9	1.083	1.115	1.071	1.006	0.958	0.82	1.024	1.015	0.98
Q60960	Importin subunit alpha-5 OS=Mus musculus OX=10090 GN=Kpna1 PE=1 SV=2	Kpna1	60.182	1.081	1.027		1.091	1.099		0.964	1.032
Q9CQ62	2,4-dienoyl-CoA reductase, mitochondrial OS=Mus musculus OX=10090 GN=Decr1 PE=1 SV=1	Decr1	36.213	0.932	0.937	0.893	0.912	0.87	0.934	1.026	1.07	0.947
Q9DBG9	Tax1-binding protein 3 OS=Mus musculus OX=10090 GN=Tax1bp3 PE=1 SV=1	Tax1bp3	13.722	0.963	1.043	0.901	0.973	0.994	1.045	0.942	1.106	1.069
Q9QYY9	Alcohol dehydrogenase 4 OS=Mus musculus OX=10090 GN=Adh4 PE=1 SV=4	Adh4	40.21			0.667			0.799			0.909
Q9WVD5	Mitochondrial ornithine transporter 1 OS=Mus musculus OX=10090 GN=Slc25a15 PE=1 SV=1	Slc25a15	32.823	0.854	0.849	0.835	1.079	1.027	1.02	0.969	0.997	0.962
Q8C3X2	Coiled-coil domain-containing protein 90B, mitochondrial OS=Mus musculus OX=10090 GN=Ccdc90b PE=1 SV=1	Ccdc90b	29.596	0.895	0.81	0.939	1.024	1.12	1.047	0.983	1.118	1.092
Q9DCL4	Probable methyltransferase-like protein 15 OS=Mus musculus OX=10090 GN=Mettl15 PE=1 SV=2	Mettl15	45.281
Q8BMD6	Transmembrane protein 260 OS=Mus musculus OX=10090 GN=Tmem260 PE=2 SV=2	Tmem260	78.946
Q60936	Atypical kinase COQ8A, mitochondrial OS=Mus musculus OX=10090 GN=Coq8a PE=1 SV=2	Coq8a	71.742	0.929	0.872	0.857	1.068	0.782	0.901	0.992	0.845	0.937
Q921T2	Torsin-1A-interacting protein 1 OS=Mus musculus OX=10090 GN=Tor1aip1 PE=1 SV=3	Tor1aip1	66.78	1.044	0.961	0.945	1.121	1.008	1.155	1.229	1.165	1.055
P01887	Beta-2-microglobulin OS=Mus musculus OX=10090 GN=B2m PE=1 SV=2	B2m	13.779	1.049		0.978	1.011		1.102	1.097		1.053
Q91VT4	Carbonyl reductase family member 4 OS=Mus musculus OX=10090 GN=Cbr4 PE=1 SV=2	Cbr4	25.414	0.928		0.896	0.974		0.886	0.868		0.731
Q9D6Y9	1,4-alpha-glucan-branching enzyme OS=Mus musculus OX=10090 GN=Gbe1 PE=1 SV=1	Gbe1	80.363	1.042			1.057			1.089
Q99P58	Ras-related protein Rab-27B OS=Mus musculus OX=10090 GN=Rab27b PE=1 SV=3	Rab27b	24.56	0.924	0.977	0.917	1.119	1.065	1.125	1.256	1.068	1.223
E9Q557	Desmoplakin OS=Mus musculus OX=10090 GN=Dsp PE=1 SV=1	Dsp	332.91	1.002	0.994	1.014	1.069	1.078	1.095	0.988	1.008	1.028
Q8R2U0	Nucleoporin SEH1 OS=Mus musculus OX=10090 GN=Seh1l PE=2 SV=1	Seh1l	39.774	0.997	0.949	1	1.142	1.104	1.171	1.275	1.01	1.127
P58771	Tropomyosin alpha-1 chain OS=Mus musculus OX=10090 GN=Tpm1 PE=1 SV=1	Tpm1	32.68		1.076	1.076		1.268	1.026		0.892	1.042
Q3UVK0	Endoplasmic reticulum metallopeptidase 1 OS=Mus musculus OX=10090 GN=Ermp1 PE=1 SV=2	Ermp1	100.15	0.957	0.992	0.98	1.21	1.158	1.211	1.198	1.113	1.04
Q99J99	3-mercaptopyruvate sulfurtransferase OS=Mus musculus OX=10090 GN=Mpst PE=1 SV=4	Mpst	33.097	1.015	0.933	1.045	1.042	0.929	1.025	1.059	0.986	0.941
Q8R080	G2 and S phase-expressed protein 1 OS=Mus musculus OX=10090 GN=Gtse1 PE=1 SV=2	Gtse1	78.751	1.137		0.95	1.02		1.162	1.394		1.626
Q60817	Nascent polypeptide-associated complex subunit alpha OS=Mus musculus OX=10090 GN=Naca PE=1 SV=1	Naca	23.384	1.09	1.045	1.108	0.966	0.943	0.923	0.916	0.959	0.894
Q9JLV5	Cullin-3 OS=Mus musculus OX=10090 GN=Cul3 PE=1 SV=1	Cul3	88.947	0.983	0.975	1.035	0.994	1.01	1.013	1.043	1.047	0.955
Q8CD15	Ribosomal oxygenase 2 OS=Mus musculus OX=10090 GN=Riox2 PE=1 SV=2	Riox2	53.516	1.065	1.072	1.025	1.327	1.266	0.904	1.183	1.116	1.027
Q69ZN7	Myoferlin OS=Mus musculus OX=10090 GN=Myof PE=1 SV=2	Myof	233.32	1.113	0.933	1.039	1.234	0.925	1.208	1.139	0.877	1.231
Q9Z2I8	Succinate--CoA ligase [GDP-forming] subunit beta, mitochondrial OS=Mus musculus OX=10090 GN=Suclg2 PE=1 SV=3	Suclg2	46.839	0.93	0.92	0.918	0.952	0.92	0.948	0.913	0.915	0.923
P14824	Annexin A6 OS=Mus musculus OX=10090 GN=Anxa6 PE=1 SV=3	Anxa6	75.884	1.057	1.127	1.08	1.248	1.219	1.218	1.27	1.245	1.275
Q921C5	Protein bicaudal D homolog 2 OS=Mus musculus OX=10090 GN=Bicd2 PE=1 SV=1	Bicd2	93.39	0.841	1.243		1.023	1.522		1.098	1.603
Q9Z2D3	Gasdermin-E OS=Mus musculus OX=10090 GN=Gsdme PE=1 SV=1	Gsdme	56.63	0.911	0.85		1.086	1.057		1.069	0.911
Q60649	Caseinolytic peptidase B protein homolog OS=Mus musculus OX=10090 GN=Clpb PE=1 SV=1	Clpb	76.003	0.995	1.018	1.024	1.383	1.063	1.106	1.627	1.086	1.038
A2A791	Zinc finger MYM-type protein 4 OS=Mus musculus OX=10090 GN=Zmym4 PE=1 SV=1	Zmym4	172.44
Q91YL2	E3 ubiquitin-protein ligase RNF126 OS=Mus musculus OX=10090 GN=Rnf126 PE=1 SV=1	Rnf126	34.08
P16014	Secretogranin-1 OS=Mus musculus OX=10090 GN=Chgb PE=1 SV=2	Chgb	77.968	1.064	1.1	1.028	0.983	1.004	0.895	1.1	1.152	1.001
Q8CGP1	Histone H2B type 1-K OS=Mus musculus OX=10090 GN=Hist1h2bk PE=1 SV=3	Hist1h2bk	13.92
P97370	Sodium/potassium-transporting ATPase subunit beta-3 OS=Mus musculus OX=10090 GN=Atp1b3 PE=1 SV=1	Atp1b3	31.775	1.137	1.079	1.108	1.3	1.261	1.268	1.215	1.176	1.224
Q91VN1	Zinc finger protein 24 OS=Mus musculus OX=10090 GN=Znf24 PE=1 SV=1	Znf24	41.918
O08789	Max-binding protein MNT OS=Mus musculus OX=10090 GN=Mnt PE=2 SV=2	Mnt	63.273
Q9CRC6	BLOC-1-related complex subunit 7 OS=Mus musculus OX=10090 GN=Borcs7 PE=1 SV=1	Borcs7	11.546	1.13		1.024	1.002		1.157	1.009		0.989
Q922W5	Pyrroline-5-carboxylate reductase 1, mitochondrial OS=Mus musculus OX=10090 GN=Pycr1 PE=1 SV=1	Pycr1	32.373			1.029			1.039			1.076
Q62447	Cyclin-C OS=Mus musculus OX=10090 GN=Ccnc PE=2 SV=4	Ccnc	33.24
Q91YD9	Neural Wiskott-Aldrich syndrome protein OS=Mus musculus OX=10090 GN=Wasl PE=1 SV=1	Wasl	54.274	1.031	1.053	1.064	1.031	0.96	1.063	1.07	1.013	0.953
P11103	Poly [ADP-ribose] polymerase 1 OS=Mus musculus OX=10090 GN=Parp1 PE=1 SV=3	Parp1	113.1	1.029	1.009	1.044	0.887	0.905	0.907	0.952	0.974	0.991
Q60598	Src substrate cortactin OS=Mus musculus OX=10090 GN=Cttn PE=1 SV=2	Cttn	61.249	0.995	1.056	1.026	0.966	0.974	0.939	0.982	1.036	0.972
Q8VDD9	PH-interacting protein OS=Mus musculus OX=10090 GN=Phip PE=1 SV=2	Phip	206.72	1.033	0.988		1.069	1.114		1.217	1.207
P17879	Heat shock 70 kDa protein 1B OS=Mus musculus OX=10090 GN=Hspa1b PE=1 SV=3	Hspa1b	70.175	1.425			1.593			1.83
Q924L1	LETM1 domain-containing protein 1 OS=Mus musculus OX=10090 GN=Letmd1 PE=1 SV=1	Letmd1	41.7
Q924M7	Mannose-6-phosphate isomerase OS=Mus musculus OX=10090 GN=Mpi PE=1 SV=1	Mpi	46.575	0.945	0.976	1.09	0.719	0.887	0.844	0.746	0.915	1.094
Q8CI75	DIS3-like exonuclease 2 OS=Mus musculus OX=10090 GN=Dis3l2 PE=1 SV=1	Dis3l2	97.774		1.009	1.027		0.917	0.904		1.052	0.868
Q8R2Q8	Bone marrow stromal antigen 2 OS=Mus musculus OX=10090 GN=Bst2 PE=1 SV=1	Bst2	19.152			1.18			1.411			1.373
Q9WUA3	ATP-dependent 6-phosphofructokinase, platelet type OS=Mus musculus OX=10090 GN=Pfkp PE=1 SV=1	Pfkp	85.454	0.918	0.992	0.957	1.062	1.079	1.075	0.92	0.95	0.937
Q9CQ06	39S ribosomal protein L24, mitochondrial OS=Mus musculus OX=10090 GN=Mrpl24 PE=1 SV=1	Mrpl24	24.944	0.993	0.969	0.96	0.954	0.941	1.003	1.011	0.971	1.012
Q8VHK9	ATP-dependent RNA helicase DHX36 OS=Mus musculus OX=10090 GN=Dhx36 PE=1 SV=2	Dhx36	113.88	1.041	1.052	1.045	0.945	1.037	0.96	1.125	1.047	1.276
Q78T54	Vacuolar ATPase assembly integral membrane protein Vma21 OS=Mus musculus OX=10090 GN=Vma21 PE=1 SV=1	Vma21	11.365	1.11	1.098	1.006	1.113	0.816	1.17	1.117	1.131	1.251
Q64669	NAD(P)H dehydrogenase [quinone] 1 OS=Mus musculus OX=10090 GN=Nqo1 PE=1 SV=3	Nqo1	30.959	0.971	0.953	0.969	0.89	0.842	0.848	0.85	0.882	0.862
P53995	Anaphase-promoting complex subunit 1 OS=Mus musculus OX=10090 GN=Anapc1 PE=1 SV=2	Anapc1	215.99	1.024	0.943	1.029	1.034	1.032	1.099	1.047	1.014	0.985
Q91Z53	Glyoxylate reductase/hydroxypyruvate reductase OS=Mus musculus OX=10090 GN=Grhpr PE=1 SV=1	Grhpr	35.328	1.009	0.977	1	0.908	0.818	0.887	0.912	0.809	0.852
Q8QZY1	Eukaryotic translation initiation factor 3 subunit L OS=Mus musculus OX=10090 GN=Eif3l PE=1 SV=1	Eif3l	66.612	1.048	1.025	1.026	0.997	0.964	1.045	0.994	1.025	1.008
Q9D868	Peptidyl-prolyl cis-trans isomerase H OS=Mus musculus OX=10090 GN=Ppih PE=1 SV=1	Ppih	20.463	1.034	1.093	0.988	0.811	0.86	1.071	0.918	0.883	0.949
P58021	Transmembrane 9 superfamily member 2 OS=Mus musculus OX=10090 GN=Tm9sf2 PE=1 SV=1	Tm9sf2	75.329	0.973	0.946	0.933	1.107	1.174	1.169	1.046	1.07	1.097
Q9D2V5	Protein AAR2 homolog OS=Mus musculus OX=10090 GN=Aar2 PE=1 SV=3	Aar2	43.408
Q9JJG0	Transforming acidic coiled-coil-containing protein 2 OS=Mus musculus OX=10090 GN=Tacc2 PE=1 SV=2	Tacc2	124.13	0.934	1.025	0.942	1.054	0.982	1.149	1.028	1.119	1.154
P32233	Developmentally-regulated GTP-binding protein 1 OS=Mus musculus OX=10090 GN=Drg1 PE=1 SV=1	Drg1	40.512	1.032	1.145	1.069	0.984	0.987	1.002	0.914	1.081	0.976
Q9D8B4	NADH dehydrogenase [ubiquinone] 1 alpha subcomplex subunit 11 OS=Mus musculus OX=10090 GN=Ndufa11 PE=1 SV=2	Ndufa11	14.982	0.965	0.846	0.966	1.043	1.144	1.029	0.969	0.964	1.023
P10755	Zinc finger protein 14 OS=Mus musculus OX=10090 GN=Zfp14 PE=2 SV=2	Zfp14	59.059
Q8K0C9	GDP-mannose 4,6 dehydratase OS=Mus musculus OX=10090 GN=Gmds PE=1 SV=1	Gmds	41.984	0.939	0.949	0.929	0.953	0.914	0.899	0.944	0.873	0.879
Q9D404	3-oxoacyl-[acyl-carrier-protein] synthase, mitochondrial OS=Mus musculus OX=10090 GN=Oxsm PE=1 SV=1	Oxsm	48.627	0.962	1.072		0.995	1.013		0.96	0.982
Q60864	Stress-induced-phosphoprotein 1 OS=Mus musculus OX=10090 GN=Stip1 PE=1 SV=1	Stip1	62.581	1.084	1.081	1.107	0.864	0.88	0.875	0.905	0.948	0.96
E9PVA8	eIF-2-alpha kinase activator GCN1 OS=Mus musculus OX=10090 GN=Gcn1 PE=1 SV=1	Gcn1	293.02	1.024	0.979	0.988	1.122	1.088	1.095	1.048	1.045	1.031
Q9Z2B5	Eukaryotic translation initiation factor 2-alpha kinase 3 OS=Mus musculus OX=10090 GN=Eif2ak3 PE=1 SV=1	Eif2ak3	124.68
Q8R0I4	TM2 domain-containing protein 2 OS=Mus musculus OX=10090 GN=Tm2d2 PE=2 SV=1	Tm2d2	22.853
Q6Q783	Histone-lysine N-methyltransferase KMT5C OS=Mus musculus OX=10090 GN=Kmt5c PE=1 SV=1	Kmt5c	53.159	1.055	1.112	1.184	1.054	0.934	1.134	1.075	0.99	1.08
Q5DU37	Zinc finger FYVE domain-containing protein 26 OS=Mus musculus OX=10090 GN=Zfyve26 PE=1 SV=2	Zfyve26	282.96		1.038			1.009			1.011
Q9D1I2	Caspase recruitment domain-containing protein 19 OS=Mus musculus OX=10090 GN=Card19 PE=1 SV=1	Card19	20.936	0.939	0.856	1.015	1.089	1.327	1.372	1.022	1.365	1.403
Q99KJ8	Dynactin subunit 2 OS=Mus musculus OX=10090 GN=Dctn2 PE=1 SV=3	Dctn2	44.116	1.048	1.024	1.062	0.898	0.875	0.872	0.962	0.919	0.911
P47911	60S ribosomal protein L6 OS=Mus musculus OX=10090 GN=Rpl6 PE=1 SV=3	Rpl6	33.509	1.039	1.043	1.049	1.041	1.041	1.005	0.956	0.974	0.963
Q60848	Lymphocyte-specific helicase OS=Mus musculus OX=10090 GN=Hells PE=1 SV=2	Hells	95.125	1.076	1.054	1.151	0.983	0.994	0.929	1.118	1.093	1.078
Q8R1F6	Protein HID1 OS=Mus musculus OX=10090 GN=Hid1 PE=1 SV=1	Hid1	88.778		1.07			1.027			1.018
Q9WVS8	Mitogen-activated protein kinase 7 OS=Mus musculus OX=10090 GN=Mapk7 PE=1 SV=1	Mapk7	87.732
Q9CY94	DNA replication complex GINS protein PSF3 OS=Mus musculus OX=10090 GN=Gins3 PE=2 SV=1	Gins3	24.576	0.967			0.912			1.035
P70175	Disks large homolog 3 OS=Mus musculus OX=10090 GN=Dlg3 PE=1 SV=1	Dlg3	93.481
A2ALW5	DnaJ homolog subfamily C member 25 OS=Mus musculus OX=10090 GN=Dnajc25 PE=1 SV=1	Dnajc25	41.937
Q05860	Formin-1 OS=Mus musculus OX=10090 GN=Fmn1 PE=1 SV=2	Fmn1	163.58		0.985			0.95			0.918
Q9CQA1	Trafficking protein particle complex subunit 5 OS=Mus musculus OX=10090 GN=Trappc5 PE=1 SV=1	Trappc5	20.795			0.954			1.108			0.996
Q8K010	5-oxoprolinase OS=Mus musculus OX=10090 GN=Oplah PE=1 SV=1	Oplah	137.61	1.059	0.857	0.956	1.057	0.811	0.958	1.073	1.304	1.028
Q3V0J1	Transmembrane protein 237 OS=Mus musculus OX=10090 GN=Tmem237 PE=1 SV=1	Tmem237	47.342
Q9R0M5	Thiamin pyrophosphokinase 1 OS=Mus musculus OX=10090 GN=Tpk1 PE=1 SV=1	Tpk1	27.068	1.032	0.989	0.948	0.925	0.707	0.685	1.021	0.718	0.811
A2APB8	Targeting protein for Xklp2 OS=Mus musculus OX=10090 GN=Tpx2 PE=1 SV=1	Tpx2	85.893		1.144	1.165		1.103	0.975		1.149	1.112
Q9WU42	Nuclear receptor corepressor 2 OS=Mus musculus OX=10090 GN=Ncor2 PE=1 SV=3	Ncor2	269.8	1.055	0.984		0.854	0.96		0.92	1.353
O08832	Polypeptide N-acetylgalactosaminyltransferase 4 OS=Mus musculus OX=10090 GN=Galnt4 PE=2 SV=1	Galnt4	66.554	1.031	1.086	0.971	1.118	1.005	1.125	1.06	1.131	1.587
Q9EQU5	Protein SET OS=Mus musculus OX=10090 GN=Set PE=1 SV=1	Set	33.377	1.014	1.052	1.007	0.875	0.961	0.866	0.876	0.932	0.884
P62700	Protein yippee-like 5 OS=Mus musculus OX=10090 GN=Ypel5 PE=1 SV=1	Ypel5	13.841	1.074	1.147		1.057	1.121		1.112	1.112
Q6ZPG2	WD repeat-containing protein 90 OS=Mus musculus OX=10090 GN=Wdr90 PE=1 SV=2	Wdr90	202.97		1.053			0.98			1.075
P52480	Pyruvate kinase PKM OS=Mus musculus OX=10090 GN=Pkm PE=1 SV=4	Pkm	57.844	0.98	0.989	0.989	0.864	0.837	0.856	0.825	0.835	0.877
P62889	60S ribosomal protein L30 OS=Mus musculus OX=10090 GN=Rpl30 PE=1 SV=2	Rpl30	12.784	0.942	0.957	0.947	1.198	1.151	1.146	1.156	1.144	1.072
P48428	Tubulin-specific chaperone A OS=Mus musculus OX=10090 GN=Tbca PE=1 SV=3	Tbca	12.758	1.096	1.033	1.072	0.843	0.909	0.854	0.871	0.935	0.956
Q6PD03	Serine/threonine-protein phosphatase 2A 56 kDa regulatory subunit alpha isoform OS=Mus musculus OX=10090 GN=Ppp2r5a PE=1 SV=1	Ppp2r5a	56.346	1.02	1.056	0.98	0.943	1.066	1.068	0.981	1.032	1.019
Q80SU7	Interferon-induced very large GTPase 1 OS=Mus musculus OX=10090 GN=Gvin1 PE=1 SV=1	Gvin1	280.81	0.967	0.986	0.96	1.01	1.006	1.023	0.999	0.937	0.957
Q9CYN9	Renin receptor OS=Mus musculus OX=10090 GN=Atp6ap2 PE=1 SV=2	Atp6ap2	39.091		1.047			1.151			1.125
Q62315	Protein Jumonji OS=Mus musculus OX=10090 GN=Jarid2 PE=1 SV=1	Jarid2	137.44			1.118			0.973			1.073
Q9JHE7	Protein TSSC4 OS=Mus musculus OX=10090 GN=Tssc4 PE=1 SV=1	Tssc4	33.569
P17439	Glucosylceramidase OS=Mus musculus OX=10090 GN=Gba PE=1 SV=1	Gba	57.621	1.04	0.992	0.997	1.07	1.147	1.127	1.126	1.079	1.001
Q9QY33	Tetraspanin-3 OS=Mus musculus OX=10090 GN=Tspan3 PE=1 SV=1	Tspan3	28.048		0.886			0.915			0.852
Q9CZ30	Obg-like ATPase 1 OS=Mus musculus OX=10090 GN=Ola1 PE=1 SV=1	Ola1	44.729	1	0.992	1.023	0.931	0.899	0.918	0.917	0.852	0.899
Q9D1Z3	Protein N-lysine methyltransferase FAM173B OS=Mus musculus OX=10090 GN=Fam173b PE=1 SV=1	Fam173b	27.397
Q8CH40	Nucleoside diphosphate-linked moiety X motif 6 OS=Mus musculus OX=10090 GN=Nudt6 PE=1 SV=1	Nudt6	35.197
Q3TC93	HCLS1-binding protein 3 OS=Mus musculus OX=10090 GN=Hs1bp3 PE=1 SV=2	Hs1bp3	43.691	0.952			0.958			0.999
Q9WVQ5	Methylthioribulose-1-phosphate dehydratase OS=Mus musculus OX=10090 GN=Apip PE=1 SV=1	Apip	26.949	1.05	1.111	1.088	0.862	0.817	0.771	1.071	1.023	0.875
Q91W89	Alpha-mannosidase 2C1 OS=Mus musculus OX=10090 GN=Man2c1 PE=1 SV=1	Man2c1	115.69	0.816	0.89	0.98	0.961	0.98	0.892	0.931	0.943	0.955
Q9CXR1	Dehydrogenase/reductase SDR family member 7 OS=Mus musculus OX=10090 GN=Dhrs7 PE=1 SV=2	Dhrs7	38.167	0.984	1.006	0.987	1.013	1.089	1.08	0.93	0.97	0.931
Q60737	Casein kinase II subunit alpha OS=Mus musculus OX=10090 GN=Csnk2a1 PE=1 SV=2	Csnk2a1	45.133	0.994	1.009	1.012	1.127	0.976	1.143	1.033	1.04	1.036
P04184	Thymidine kinase, cytosolic OS=Mus musculus OX=10090 GN=Tk1 PE=1 SV=3	Tk1	25.776	1.036	1.043	1.072	1.052	0.976	1.003	0.999	1.063	1.047
Q91V12	Cytosolic acyl coenzyme A thioester hydrolase OS=Mus musculus OX=10090 GN=Acot7 PE=1 SV=2	Acot7	42.536	1.104	1.132	1.126	0.969	0.908	0.989	1.018	1.059	0.911
P35822	Receptor-type tyrosine-protein phosphatase kappa OS=Mus musculus OX=10090 GN=Ptprk PE=1 SV=1	Ptprk	164.18	1.048		0.982	1.135		1.058	1.051		1.024
P32067	Lupus La protein homolog OS=Mus musculus OX=10090 GN=Ssb PE=1 SV=1	Ssb	47.756	1.019	1.009	1.026	0.925	0.945	0.914	0.958	1.006	0.997
E9Q7G0	Nuclear mitotic apparatus protein 1 OS=Mus musculus OX=10090 GN=Numa1 PE=1 SV=1	Numa1	235.63	1.004	1.018	1.037	0.88	0.909	0.9	0.957	0.972	1.001
F7BJB9	MORC family CW-type zinc finger protein 3 OS=Mus musculus OX=10090 GN=Morc3 PE=1 SV=1	Morc3	106.52	0.958	1.082	0.987	1.008	1.076	1.177	1.169	1.025	1.119
O55106	Striatin OS=Mus musculus OX=10090 GN=Strn PE=1 SV=2	Strn	85.965	1.057	1.018	1.036	1.093	0.961	0.946	1.057	1.011	0.952
Q9CVB6	Actin-related protein 2/3 complex subunit 2 OS=Mus musculus OX=10090 GN=Arpc2 PE=1 SV=3	Arpc2	34.357	0.991	0.992	1	0.958	0.934	0.967	0.976	0.92	0.941
Q80WR5	UPF0688 protein C1orf174 homolog OS=Mus musculus OX=10090 PE=1 SV=1	---	24.774
O35083	1-acyl-sn-glycerol-3-phosphate acyltransferase alpha OS=Mus musculus OX=10090 GN=Agpat1 PE=1 SV=1	Agpat1	31.709
Q8BK64	Activator of 90 kDa heat shock protein ATPase homolog 1 OS=Mus musculus OX=10090 GN=Ahsa1 PE=1 SV=2	Ahsa1	38.117	1.042	1.037	1.061	0.915	0.945	0.952	0.975	0.976	1.024
Q6PAM1	Alpha-taxilin OS=Mus musculus OX=10090 GN=Txlna PE=1 SV=1	Txlna	62.368	1.098	1.065	1.081	1.066	1.086	1.142	1.096	1.147	1.051
P97821	Dipeptidyl peptidase 1 OS=Mus musculus OX=10090 GN=Ctsc PE=1 SV=1	Ctsc	52.376	0.65	1.018	1.04	0.779	1.103	1.039	1.9	0.995	1.025
Q3V300	Kinesin-like protein KIF22 OS=Mus musculus OX=10090 GN=Kif22 PE=2 SV=2	Kif22	73.189	1.151	1.018	1.038	0.96	1.159	1.434	1.139	1.199	1.148
P05977	Myosin light chain 1/3, skeletal muscle isoform OS=Mus musculus OX=10090 GN=Myl1 PE=1 SV=2	Myl1	20.594	1.019	1.017	0.97	1.12	1.202	1.201	0.796	1.21	0.961
Q99P30	Peroxisomal coenzyme A diphosphatase NUDT7 OS=Mus musculus OX=10090 GN=Nudt7 PE=1 SV=2	Nudt7	26.856
Q3ULF4	Paraplegin OS=Mus musculus OX=10090 GN=Spg7 PE=1 SV=1	Spg7	85.995	0.916	0.971	0.973	1.013	1.074	1.052	0.952	0.968	1.074
Q9DBM1	G patch domain-containing protein 1 OS=Mus musculus OX=10090 GN=Gpatch1 PE=2 SV=1	Gpatch1	103.01		0.88	0.859		0.86	0.958		1.187	1.087
Q3U7R1	Extended synaptotagmin-1 OS=Mus musculus OX=10090 GN=Esyt1 PE=1 SV=2	Esyt1	121.55	1.081	1.031	1.01	1.177	1.098	1.323	1.099	1.142	1.167
Q60605	Myosin light polypeptide 6 OS=Mus musculus OX=10090 GN=Myl6 PE=1 SV=3	Myl6	16.93	0.958	1.009	1.004	1.067	1.054	1.052	0.947	0.967	0.96
Q80U63	Mitofusin-2 OS=Mus musculus OX=10090 GN=Mfn2 PE=1 SV=3	Mfn2	86.187	0.959	1.238	1.128	1.071	1.291	0.929	1.022	1.625	0.915
P36993	Protein phosphatase 1B OS=Mus musculus OX=10090 GN=Ppm1b PE=1 SV=1	Ppm1b	42.795	0.998	0.97	0.933	0.91	0.913	0.835	0.844	1.039	0.836
Q61165	Sodium/hydrogen exchanger 1 OS=Mus musculus OX=10090 GN=Slc9a1 PE=1 SV=1	Slc9a1	91.467
O35309	N-myc-interactor OS=Mus musculus OX=10090 GN=Nmi PE=1 SV=1	Nmi	35.235	0.954	0.856	0.95	0.967	0.959	0.882	1.036	0.944	1.022
Q8BFY6	Peflin OS=Mus musculus OX=10090 GN=Pef1 PE=1 SV=1	Pef1	29.227	0.997	1.08	0.953	1.039	1.071	1.011	0.909	1.061	0.925
Q8R0G7	Protein spinster homolog 1 OS=Mus musculus OX=10090 GN=Spns1 PE=2 SV=1	Spns1	56.708
Q3TIX9	U4/U6.U5 tri-snRNP-associated protein 2 OS=Mus musculus OX=10090 GN=Usp39 PE=1 SV=2	Usp39	65.146	1.049	0.923	1.053	0.948	0.908	1.026	0.99	1.1	1.1
Q91XD7	Cysteine-rich with EGF-like domain protein 1 OS=Mus musculus OX=10090 GN=Creld1 PE=1 SV=1	Creld1	45.717		0.973			1.123			1.367
Q501J7	Phosphatase and actin regulator 4 OS=Mus musculus OX=10090 GN=Phactr4 PE=1 SV=2	Phactr4	76.631	1.04	1.036	0.793	1.002	0.974	0.917	0.876	1.026	1.273
P07903	DNA excision repair protein ERCC-1 OS=Mus musculus OX=10090 GN=Ercc1 PE=2 SV=2	Ercc1	32.909
Q91VJ4	Serine/threonine-protein kinase 38 OS=Mus musculus OX=10090 GN=Stk38 PE=1 SV=1	Stk38	54.174	0.956	0.933	1.033	1.038	1.014	1.086	1.099	1.113	1.001
Q7TSI3	Serine/threonine-protein phosphatase 6 regulatory subunit 1 OS=Mus musculus OX=10090 GN=Ppp6r1 PE=1 SV=1	Ppp6r1	94.526	1.104	1.041	1.175	0.906	0.911	0.93	1.016	0.956	1.039
O55126	Protein NipSnap homolog 2 OS=Mus musculus OX=10090 GN=Nipsnap2 PE=1 SV=1	Nipsnap2	32.932	0.91	0.923	0.886	0.961	1.065	0.988	0.893	0.978	0.864
Q9CQ18	Ribonuclease H2 subunit C OS=Mus musculus OX=10090 GN=Rnaseh2c PE=1 SV=1	Rnaseh2c	17.823	1.106	1.107	0.887	0.836	0.938	1.037	1.058	0.968	1.162
Q8VCN5	Cystathionine gamma-lyase OS=Mus musculus OX=10090 GN=Cth PE=1 SV=1	Cth	43.567	0.949	0.927	0.936	0.771	0.748	0.754	0.727	0.807	0.883
Q5DU09	Zinc finger protein 652 OS=Mus musculus OX=10090 GN=Znf652 PE=1 SV=2	Znf652	69.44
Q0VBD2	Protein MCM10 homolog OS=Mus musculus OX=10090 GN=Mcm10 PE=1 SV=1	Mcm10	98.405
Q8BHD7	Polypyrimidine tract-binding protein 3 OS=Mus musculus OX=10090 GN=Ptbp3 PE=1 SV=1	Ptbp3	56.7	0.987	0.996	0.969	0.901	1.017	0.925	1.054	0.988	0.971
Q9D975	Sulfiredoxin-1 OS=Mus musculus OX=10090 GN=Srxn1 PE=2 SV=1	Srxn1	14.149
Q9CQL4	39S ribosomal protein L20, mitochondrial OS=Mus musculus OX=10090 GN=Mrpl20 PE=1 SV=1	Mrpl20	17.595		0.99	1.015		1.048	1.054		0.945	1.032
Q922Y1	UBX domain-containing protein 1 OS=Mus musculus OX=10090 GN=Ubxn1 PE=1 SV=1	Ubxn1	33.572	0.978	1.015	1.039	0.998	0.894	0.886	0.983	0.964	0.883
Q61733	28S ribosomal protein S31, mitochondrial OS=Mus musculus OX=10090 GN=Mrps31 PE=1 SV=1	Mrps31	43.88	0.944	0.987	0.982	1.038	0.921	0.945	0.96	0.964	0.986
Q7TT37	Elongator complex protein 1 OS=Mus musculus OX=10090 GN=Elp1 PE=1 SV=2	Elp1	149.58	1.021	1.023	0.971	1.169	1.132	1.144	1.071	1.058	1.123
Q8CGC4	Protein LSM14 homolog B OS=Mus musculus OX=10090 GN=Lsm14b PE=1 SV=3	Lsm14b	42.309
P50096	Inosine-5'-monophosphate dehydrogenase 1 OS=Mus musculus OX=10090 GN=Impdh1 PE=1 SV=2	Impdh1	55.278	1.129	1.035		1.099	1.233		1.032	1.123
Q6P5E6	ADP-ribosylation factor-binding protein GGA2 OS=Mus musculus OX=10090 GN=Gga2 PE=1 SV=1	Gga2	66.048		0.943	1.021		1.066	0.922		0.965	1.142
Q80U78	Pumilio homolog 1 OS=Mus musculus OX=10090 GN=Pum1 PE=1 SV=2	Pum1	126.62	0.932	1.007	0.966	0.93	0.903	0.919	1.003	0.926	1.025
Q60715	Prolyl 4-hydroxylase subunit alpha-1 OS=Mus musculus OX=10090 GN=P4ha1 PE=1 SV=2	P4ha1	60.909		1.015	1.119		1.224	1.279		0.971	1.092
Q9Z2Q5	39S ribosomal protein L40, mitochondrial OS=Mus musculus OX=10090 GN=Mrpl40 PE=1 SV=2	Mrpl40	24.301	1.068	1.055	1.021	0.832	0.968	0.82	0.993	0.918	0.923
Q10470	Beta-1,4-mannosyl-glycoprotein 4-beta-N-acetylglucosaminyltransferase OS=Mus musculus OX=10090 GN=Mgat3 PE=1 SV=2	Mgat3	62.002			0.793			0.947			1.403
Q9R1K9	Centrin-2 OS=Mus musculus OX=10090 GN=Cetn2 PE=1 SV=1	Cetn2	19.796	1.118		1.041	1.043		1.054	0.927		1.022
Q4VGL6	Roquin-1 OS=Mus musculus OX=10090 GN=Rc3h1 PE=1 SV=1	Rc3h1	125.38
Q9JHS4	ATP-dependent Clp protease ATP-binding subunit clpX-like, mitochondrial OS=Mus musculus OX=10090 GN=Clpx PE=1 SV=2	Clpx	69.228	0.975	0.971	0.987	1.061	1.034	1.119	1	1.023	1.054
Q8BJY1	26S proteasome non-ATPase regulatory subunit 5 OS=Mus musculus OX=10090 GN=Psmd5 PE=1 SV=4	Psmd5	55.971	0.997	1.048	1.076	0.966	0.903	0.914	0.928	0.857	0.89
Q711T7	Glutamine-dependent NAD(+) synthetase OS=Mus musculus OX=10090 GN=Nadsyn1 PE=1 SV=1	Nadsyn1	81.652	0.949	0.951		1.005	0.872		0.992	0.908
Q99MU3	Double-stranded RNA-specific adenosine deaminase OS=Mus musculus OX=10090 GN=Adar PE=1 SV=2	Adar	130.45
Q64337	Sequestosome-1 OS=Mus musculus OX=10090 GN=Sqstm1 PE=1 SV=1	Sqstm1	48.162		1.128			1.22			0.989
Q99N94	39S ribosomal protein L9, mitochondrial OS=Mus musculus OX=10090 GN=Mrpl9 PE=1 SV=2	Mrpl9	30.244	0.93	0.994	0.961	0.907	0.931	1.056	0.967	0.976	0.976
Q6DIB4	Nucleolar protein 4-like OS=Mus musculus OX=10090 GN=Nol4l PE=2 SV=1	Nol4l	53.912	1.167	0.982		1.109	1.193		0.965	1.234
Q61827	Transcription factor MafK OS=Mus musculus OX=10090 GN=Mafk PE=1 SV=1	Mafk	17.537		0.856			1.104			1.36
Q3UBZ5	MIF4G domain-containing protein OS=Mus musculus OX=10090 GN=Mif4gd PE=1 SV=1	Mif4gd	25.493
Q99JR5	Tubulointerstitial nephritis antigen-like OS=Mus musculus OX=10090 GN=Tinagl1 PE=1 SV=1	Tinagl1	52.664	1.278	1.251	1.258	1.94	1.849	1.721	1.777	1.711	1.813
A2RTL5	Arginine/serine-rich coiled-coil protein 2 OS=Mus musculus OX=10090 GN=Rsrc2 PE=2 SV=1	Rsrc2	43.876		1.121	1.062		0.901	1.034		0.918	0.994
Q9D2Z4	Sentrin-specific protease 8 OS=Mus musculus OX=10090 GN=Senp8 PE=1 SV=2	Senp8	25.057			0.792			0.793			0.88
Q9ER69	Pre-mRNA-splicing regulator WTAP OS=Mus musculus OX=10090 GN=Wtap PE=1 SV=3	Wtap	44.176	1.1	1.047	1.09	1.036	1.044	1.036	1	1.063	1.144
Q8BH70	F-box/LRR-repeat protein 4 OS=Mus musculus OX=10090 GN=Fbxl4 PE=1 SV=1	Fbxl4	70.268	1.221			1.638			1.438
Q922E4	Ethanolamine-phosphate cytidylyltransferase OS=Mus musculus OX=10090 GN=Pcyt2 PE=1 SV=1	Pcyt2	45.234	0.891	0.983	0.897	0.81	0.842	0.839	0.805	0.761	0.811
Q9QZH3	Peptidyl-prolyl cis-trans isomerase E OS=Mus musculus OX=10090 GN=Ppie PE=1 SV=2	Ppie	33.448	0.981	1.054	1.048	0.927	0.887	1.021	0.941	1.002	0.948
P16546	Spectrin alpha chain, non-erythrocytic 1 OS=Mus musculus OX=10090 GN=Sptan1 PE=1 SV=4	Sptan1	284.59	1.028	1.031	1.048	0.987	0.986	0.979	0.919	0.924	0.931
Q8BTW9	Serine/threonine-protein kinase PAK 4 OS=Mus musculus OX=10090 GN=Pak4 PE=1 SV=1	Pak4	64.622		1.211	0.988		0.943	1.046		0.953	0.973
Q3TW96	UDP-N-acetylhexosamine pyrophosphorylase-like protein 1 OS=Mus musculus OX=10090 GN=Uap1l1 PE=1 SV=1	Uap1l1	56.613	0.909	0.916	0.902	0.924	1.026	0.957	1.1	0.923	1.053
Q99KR7	Peptidyl-prolyl cis-trans isomerase F, mitochondrial OS=Mus musculus OX=10090 GN=Ppif PE=1 SV=1	Ppif	21.737	1	0.99	1.033	0.819	0.847	0.823	0.878	0.986	0.866
O89001	Carboxypeptidase D OS=Mus musculus OX=10090 GN=Cpd PE=1 SV=2	Cpd	152.4	1.021	0.974	0.969	1.105	1.126	1.139	1.001	1.024	1.048
Q9JI99	Sphingosine-1-phosphate phosphatase 1 OS=Mus musculus OX=10090 GN=Sgpp1 PE=1 SV=1	Sgpp1	47.744	0.98	1.044		1.188	1.144		1.235	1.204
Q8BKS9	Pumilio homolog 3 OS=Mus musculus OX=10090 GN=Pum3 PE=1 SV=2	Pum3	72.799	1.051	1.082	1.145	1.118	1.158	1.157	1.196	1.248	1.118
Q9D6K8	FUN14 domain-containing protein 2 OS=Mus musculus OX=10090 GN=Fundc2 PE=1 SV=1	Fundc2	16.564	1.052	1.042	1.059	1.023	1.085	1.023	0.969	0.982	0.985
Q0KL02	Triple functional domain protein OS=Mus musculus OX=10090 GN=Trio PE=1 SV=3	Trio	347.86			0.737			1.235			1.1
Q9CQJ8	NADH dehydrogenase [ubiquinone] 1 beta subcomplex subunit 9 OS=Mus musculus OX=10090 GN=Ndufb9 PE=1 SV=3	Ndufb9	21.984	0.764	0.807	0.774	0.967	1.051	1.07	0.916	1.025	1.038
O88522	NF-kappa-B essential modulator OS=Mus musculus OX=10090 GN=Ikbkg PE=1 SV=2	Ikbkg	47.972	0.789	1.147		0.857	1.094		1.38	1.114
Q91VZ6	Stromal membrane-associated protein 1 OS=Mus musculus OX=10090 GN=Smap1 PE=1 SV=1	Smap1	47.66	0.98	1.028	1.064	0.956	0.888	0.91	0.962	0.879	0.856
P97360	Transcription factor ETV6 OS=Mus musculus OX=10090 GN=Etv6 PE=1 SV=1	Etv6	56.405	1	0.958		0.921	0.917		1.305	1.194
Q8VDC1	FYVE and coiled-coil domain-containing protein 1 OS=Mus musculus OX=10090 GN=Fyco1 PE=1 SV=1	Fyco1	162.33
Q810U5	Coiled-coil domain-containing protein 50 OS=Mus musculus OX=10090 GN=Ccdc50 PE=1 SV=1	Ccdc50	35.321	0.834	1.122		1.04	1.082		1.642	1.138
P02463	Collagen alpha-1(IV) chain OS=Mus musculus OX=10090 GN=Col4a1 PE=1 SV=4	Col4a1	160.68	1.101	1.17	1.229	1.581	1.596	1.679	1.644	1.585	1.679
Q3TCJ1	BRISC complex subunit Abraxas 2 OS=Mus musculus OX=10090 GN=Abraxas2 PE=1 SV=1	Abraxas2	46.942	0.994	0.99	0.941	0.989	1.008	1.022	0.901	0.995	0.924
Q9D1E6	Tubulin-folding cofactor B OS=Mus musculus OX=10090 GN=Tbcb PE=1 SV=2	Tbcb	27.385	1.029	1.034	1.061	1.062	0.932	0.964	1.048	0.929	1.143
Q9QY93	dCTP pyrophosphatase 1 OS=Mus musculus OX=10090 GN=Dctpp1 PE=1 SV=1	Dctpp1	18.795		1.034	1.12		0.913	0.992		0.973	0.851
P35282	Ras-related protein Rab-21 OS=Mus musculus OX=10090 GN=Rab21 PE=1 SV=4	Rab21	24.106		1.004	1.034		0.959	1.096		0.877	1.064
Q91VX2	Ubiquitin-associated protein 2 OS=Mus musculus OX=10090 GN=Ubap2 PE=1 SV=1	Ubap2	117.96	1.143	1.107	1.154	1.039	1.021	1.051	1.096	1.135	1.114
Q8BMJ3	Eukaryotic translation initiation factor 1A, X-chromosomal OS=Mus musculus OX=10090 GN=Eif1ax PE=2 SV=3	Eif1ax	16.46	1.135	1.028	1.022	0.975	0.961	1.016	0.836	0.941	0.892
O35710	Nocturnin OS=Mus musculus OX=10090 GN=Noct PE=1 SV=3	Noct	48.3
P62830	60S ribosomal protein L23 OS=Mus musculus OX=10090 GN=Rpl23 PE=1 SV=1	Rpl23	14.865	1.04	1.038	1.058	0.995	1.034	0.939	0.997	0.986	0.972
Q91YE5	Bromodomain adjacent to zinc finger domain protein 2A OS=Mus musculus OX=10090 GN=Baz2a PE=1 SV=2	Baz2a	209.62	1.002	0.993	1.086	1.134	1.09	1.201	1.082	1.102	1.138
P97872	Dimethylaniline monooxygenase [N-oxide-forming] 5 OS=Mus musculus OX=10090 GN=Fmo5 PE=1 SV=4	Fmo5	60	0.809	0.807	0.781	1.066	1.015	0.989	1.079	1.057	1.031
Q80Y84	Lysine-specific demethylase 5B OS=Mus musculus OX=10090 GN=Kdm5b PE=1 SV=1	Kdm5b	175.55	1.154	1.095		1.281	1.248		1.008	1.24
Q8R087	Beta-1,4-galactosyltransferase 7 OS=Mus musculus OX=10090 GN=B4galt7 PE=2 SV=1	B4galt7	37.754
Q8CCP0	Nuclear export mediator factor Nemf OS=Mus musculus OX=10090 GN=Nemf PE=1 SV=2	Nemf	121.19	1.03	1.064	1.027	1.047	0.998	1.029	0.971	0.998	1.015
O35680	28S ribosomal protein S12, mitochondrial OS=Mus musculus OX=10090 GN=Mrps12 PE=2 SV=1	Mrps12	15.437	0.979	0.889	0.891	1.056	1.022	1.067	1.058	1.075	1.11
Q61823	Programmed cell death protein 4 OS=Mus musculus OX=10090 GN=Pdcd4 PE=1 SV=1	Pdcd4	51.702	0.79	0.735	0.793	0.744	0.694	0.654	0.838	0.69	0.723
A2ADY9	Protein DDI1 homolog 2 OS=Mus musculus OX=10090 GN=Ddi2 PE=1 SV=1	Ddi2	44.59	0.989	0.978	1.066	0.855	0.804	0.81	0.97	1.005	0.826
P62908	40S ribosomal protein S3 OS=Mus musculus OX=10090 GN=Rps3 PE=1 SV=1	Rps3	26.674	1.043	1.02	1.034	1.141	1.091	1.12	1.004	0.995	1.014
Q9D1R2	Protein KTI12 homolog OS=Mus musculus OX=10090 GN=Kti12 PE=1 SV=1	Kti12	38.444	0.966	0.998	1.098	1.118	1.033	0.879	1.03	1.038	1.079
F6ZDS4	Nucleoprotein TPR OS=Mus musculus OX=10090 GN=Tpr PE=1 SV=1	Tpr	273.99	1.023	1.031	1.033	1.061	1.051	1.081	1.143	1.139	1.15
Q8VCR7	Protein ABHD14B OS=Mus musculus OX=10090 GN=Abhd14b PE=1 SV=1	Abhd14b	22.45	0.894	0.937	0.965	0.742	0.756	0.712	0.765	0.726	0.732
P14685	26S proteasome non-ATPase regulatory subunit 3 OS=Mus musculus OX=10090 GN=Psmd3 PE=1 SV=3	Psmd3	60.718	1.004	1.001	1.017	1.051	1.037	1.053	0.993	0.974	0.987
Q61263	Sterol O-acyltransferase 1 OS=Mus musculus OX=10090 GN=Soat1 PE=1 SV=2	Soat1	63.798	1.009	0.918		1.125	0.991		1.188	1.089
Q99KG5	Lipolysis-stimulated lipoprotein receptor OS=Mus musculus OX=10090 GN=Lsr PE=1 SV=1	Lsr	66.107	1.038	1.059	1.05	0.984	1.036	1.064	1.016	1.143	1.113
Q8R0W0	Epiplakin OS=Mus musculus OX=10090 GN=Eppk1 PE=1 SV=2	Eppk1	723.3	1.009	1.013	1.009	1.042	1.047	1.031	1.016	1.04	1.038
Q6P3B2	UBA-like domain-containing protein 1 OS=Mus musculus OX=10090 GN=Ubald1 PE=2 SV=1	Ubald1	18.91	1.005	0.958	0.964	0.997	0.887	0.853	1.53	1.136	1.009
O35638	Cohesin subunit SA-2 OS=Mus musculus OX=10090 GN=Stag2 PE=1 SV=3	Stag2	141.28	0.998	1.025	1.015	0.951	0.953	0.957	0.999	1.054	0.975
Q922J3	CAP-Gly domain-containing linker protein 1 OS=Mus musculus OX=10090 GN=Clip1 PE=1 SV=1	Clip1	155.81	1.025	1.038	1.074	0.932	1.003	1.029	1.137	1.162	1.153
Q91ZM2	SH2B adapter protein 1 OS=Mus musculus OX=10090 GN=Sh2b1 PE=1 SV=2	Sh2b1	79.624	1.027	0.904	1.033	1.073	0.867	0.985	1.023	1.136	0.883
P97351	40S ribosomal protein S3a OS=Mus musculus OX=10090 GN=Rps3a PE=1 SV=3	Rps3a	29.885	1.075	1.032	1.017	1.076	1.071	1.078	1.042	1.025	1.007
Q8BLY7	Hermansky-Pudlak syndrome 6 protein homolog OS=Mus musculus OX=10090 GN=Hps6 PE=1 SV=3	Hps6	87.34			0.91			1.348			1.098
Q62395	Trefoil factor 3 OS=Mus musculus OX=10090 GN=Tff3 PE=1 SV=2	Tff3	8.8081	1.059	1.009	0.988	0.624	0.79	0.812	0.902	0.829	0.916
P58742	Aladin OS=Mus musculus OX=10090 GN=Aaas PE=1 SV=1	Aaas	59.43	0.958	0.99	1.062	1.172	1.161	1.118	1.153	1.081	1.122
O88895	Histone deacetylase 3 OS=Mus musculus OX=10090 GN=Hdac3 PE=1 SV=1	Hdac3	48.364		0.889			1.028			1.134
Q9CR84	ATP synthase F(0) complex subunit C1, mitochondrial OS=Mus musculus OX=10090 GN=Atp5mc1 PE=2 SV=1	Atp5mc1	14.2	0.432			0.723			2.138
Q76HP3	Transmembrane protein 132D OS=Mus musculus OX=10090 GN=Tmem132d PE=2 SV=1	Tmem132d	121.41	0.44			0.462			1.023
Q9JM96	Cdc42 effector protein 4 OS=Mus musculus OX=10090 GN=Cdc42ep4 PE=1 SV=1	Cdc42ep4	37.869	1.042	1.23	0.791	1.123	1.105	1.351	1.081	1.356	1.276
Q99KS2	Neugrin OS=Mus musculus OX=10090 GN=Ngrn PE=2 SV=3	Ngrn	32.446
Q64514	Tripeptidyl-peptidase 2 OS=Mus musculus OX=10090 GN=Tpp2 PE=1 SV=3	Tpp2	139.88	1.055	1.048	1.048	0.991	1.009	1.021	0.942	0.971	0.983
P51174	Long-chain specific acyl-CoA dehydrogenase, mitochondrial OS=Mus musculus OX=10090 GN=Acadl PE=1 SV=2	Acadl	47.907	0.874	0.846	0.809	0.963	0.904	0.959	1.048	1.044	0.959
O88609	LIM homeobox transcription factor 1-beta OS=Mus musculus OX=10090 GN=Lmx1b PE=1 SV=3	Lmx1b	44.102	1.178		1.228	0.923		1.245	1.359		1.302
O70472	Transmembrane protein 131 OS=Mus musculus OX=10090 GN=Tmem131 PE=2 SV=2	Tmem131	204.65
P58242	Acid sphingomyelinase-like phosphodiesterase 3b OS=Mus musculus OX=10090 GN=Smpdl3b PE=1 SV=1	Smpdl3b	51.599	0.937	1.065	1	1.088	1.08	1.084	1.183	1.227	1.166
Q8CCM6	Mitochondrial import inner membrane translocase subunit Tim21 OS=Mus musculus OX=10090 GN=Timm21 PE=1 SV=1	Timm21	28.304	0.872		0.893	1.09		1.133	1.12		1.018
Q99JW2	Aminoacylase-1 OS=Mus musculus OX=10090 GN=Acy1 PE=1 SV=1	Acy1	45.78	0.934	0.934	0.958	0.784	0.717	0.817	0.842	0.907	0.861
Q9CQV1	Mitochondrial import inner membrane translocase subunit TIM16 OS=Mus musculus OX=10090 GN=Pam16 PE=1 SV=1	Pam16	13.784	1.057		1.017	1.245		1.136	1.117		1.024
Q8VCM8	Nicalin OS=Mus musculus OX=10090 GN=Ncln PE=1 SV=2	Ncln	62.907	0.961	0.932	0.952	1.107	1.08	1.097	1.023	1.043	1.004
Q91X88	Protein O-linked-mannose beta-1,2-N-acetylglucosaminyltransferase 1 OS=Mus musculus OX=10090 GN=Pomgnt1 PE=1 SV=1	Pomgnt1	75.109
P98192	Dihydroxyacetone phosphate acyltransferase OS=Mus musculus OX=10090 GN=Gnpat PE=1 SV=1	Gnpat	76.869
P41216	Long-chain-fatty-acid--CoA ligase 1 OS=Mus musculus OX=10090 GN=Acsl1 PE=1 SV=2	Acsl1	77.951	0.88	0.876	0.894	1.074	1.094	1.021	1.085	1.03	1.056
P62264	40S ribosomal protein S14 OS=Mus musculus OX=10090 GN=Rps14 PE=1 SV=3	Rps14	16.273	1.079	1.056	1.099	1.048	0.961	1.054	0.995	0.962	0.994
Q3UB74	Transforming growth factor beta regulator 1 OS=Mus musculus OX=10090 GN=Tbrg1 PE=1 SV=2	Tbrg1	44.881			1.038			1.152			1.058
Q9CY18	Sorting nexin-7 OS=Mus musculus OX=10090 GN=Snx7 PE=1 SV=1	Snx7	45	0.956	1.017	0.934	0.979	0.948	1.005	0.931	0.929	0.947
A6H6A9	Rab GTPase-activating protein 1-like OS=Mus musculus OX=10090 GN=Rabgap1l PE=1 SV=1	Rabgap1l	92.403		0.893			1.131			0.894
Q8C1D8	Protein IWS1 homolog OS=Mus musculus OX=10090 GN=Iws1 PE=1 SV=1	Iws1	85.247	1	1.046	0.981	0.935	0.892	0.911	0.988	0.958	1.006
Q8VCT3	Aminopeptidase B OS=Mus musculus OX=10090 GN=Rnpep PE=1 SV=2	Rnpep	72.415	0.949	0.967	0.993	0.846	0.898	0.903	0.854	0.806	0.911
Q8K0C4	Lanosterol 14-alpha demethylase OS=Mus musculus OX=10090 GN=Cyp51a1 PE=1 SV=1	Cyp51a1	56.775	1.011	0.993	1.002	1.075	1.087	1.087	0.953	0.915	0.978
P17918	Proliferating cell nuclear antigen OS=Mus musculus OX=10090 GN=Pcna PE=1 SV=2	Pcna	28.785	1.084	1.055	1.092	0.853	0.871	0.907	0.944	0.929	0.967
A2RSY6	TRMT1-like protein OS=Mus musculus OX=10090 GN=Trmt1l PE=1 SV=1	Trmt1l	80.86	0.774	0.898		0.88	1.206		1.806	1.041
Q9D162	Coiled-coil domain-containing protein 167 OS=Mus musculus OX=10090 GN=Ccdc167 PE=1 SV=2	Ccdc167	11.475
Q69ZS7	HBS1-like protein OS=Mus musculus OX=10090 GN=Hbs1l PE=1 SV=2	Hbs1l	75.1	0.904	1.024	1.047	1.083	0.98	1.017	1.106	0.961	1.004
Q03146	Epithelial discoidin domain-containing receptor 1 OS=Mus musculus OX=10090 GN=Ddr1 PE=2 SV=2	Ddr1	101.16	1.2			1.099			1.118
Q8BG48	Serine/threonine-protein kinase 17B OS=Mus musculus OX=10090 GN=Stk17b PE=1 SV=1	Stk17b	41.982
P55302	Alpha-2-macroglobulin receptor-associated protein OS=Mus musculus OX=10090 GN=Lrpap1 PE=1 SV=1	Lrpap1	42.215	0.969	1.01	0.966	1.035	1.038	1.147	1.003	1.038	0.98
Q9CRG1	Transmembrane 7 superfamily member 3 OS=Mus musculus OX=10090 GN=Tm7sf3 PE=2 SV=2	Tm7sf3	63.25
Q8BZH4	Pogo transposable element with ZNF domain OS=Mus musculus OX=10090 GN=Pogz PE=1 SV=2	Pogz	154.91	0.764	1.1	0.969	1.021	0.892	1.047	1.434	1.06	1.129
Q6DG52	Protein Churchill OS=Mus musculus OX=10090 GN=Churc1 PE=3 SV=1	Churc1	12.858
P62331	ADP-ribosylation factor 6 OS=Mus musculus OX=10090 GN=Arf6 PE=1 SV=2	Arf6	20.082	0.987	0.998	0.952	0.978	1.072	1.072	0.959	0.944	0.975
E9Q394	A-kinase anchor protein 13 OS=Mus musculus OX=10090 GN=Akap13 PE=1 SV=1	Akap13	303.97			1.007			1.153			1.156
Q9JMH9	Unconventional myosin-XVIIIa OS=Mus musculus OX=10090 GN=Myo18a PE=1 SV=2	Myo18a	232.75	1.041	1.038	1.017	1.107	1.039	1.114	1.099	1.037	1.145
Q66JY6	Rho guanine nucleotide exchange factor 39 OS=Mus musculus OX=10090 GN=Arhgef39 PE=2 SV=2	Arhgef39	39.106
Q9JLQ2	ARF GTPase-activating protein GIT2 OS=Mus musculus OX=10090 GN=Git2 PE=1 SV=2	Git2	78.765
P62821	Ras-related protein Rab-1A OS=Mus musculus OX=10090 GN=Rab1A PE=1 SV=3	Rab1A	22.677	0.954	0.967	0.916	0.998	1.04	1.019	0.977	0.962	0.987
O35691	Pinin OS=Mus musculus OX=10090 GN=Pnn PE=1 SV=4	Pnn	82.435	0.95	0.942	1.057	1.037	0.998	0.993	1.169	1.147	1.016
Q8C2E7	WASH complex subunit 5 OS=Mus musculus OX=10090 GN=Washc5 PE=1 SV=2	Washc5	134.11	0.954	0.919	1.023	1.048	1.055	1.054	1.035	1.098	1.124
Q8BJW6	Eukaryotic translation initiation factor 2A OS=Mus musculus OX=10090 GN=Eif2a PE=1 SV=2	Eif2a	64.403	1.07	1.099	1.088	0.918	0.938	0.953	0.964	0.941	0.993
O70492	Sorting nexin-3 OS=Mus musculus OX=10090 GN=Snx3 PE=1 SV=3	Snx3	18.757	1.019	0.944	0.956	1.032	0.964	1.017	1.02	0.972	0.956
P62281	40S ribosomal protein S11 OS=Mus musculus OX=10090 GN=Rps11 PE=1 SV=3	Rps11	18.431	1.011	1.034	1.016	1.1	1.099	1.064	1.044	1.002	1.015
Q9WVE8	Protein kinase C and casein kinase substrate in neurons protein 2 OS=Mus musculus OX=10090 GN=Pacsin2 PE=1 SV=1	Pacsin2	55.832	1.031	1.061	0.978	0.969	0.966	1.042	0.966	0.984	0.991
O09049	Regenerating islet-derived protein 3-gamma OS=Mus musculus OX=10090 GN=Reg3g PE=1 SV=1	Reg3g	19.307
P63101	14-3-3 protein zeta/delta OS=Mus musculus OX=10090 GN=Ywhaz PE=1 SV=1	Ywhaz	27.771	1.029	1.023	0.997	0.845	0.864	0.861	0.823	0.811	0.816
Q3UQ84	Threonine--tRNA ligase, mitochondrial OS=Mus musculus OX=10090 GN=Tars2 PE=1 SV=1	Tars2	81.699	0.971	0.973	0.969	0.937	0.974	0.981	1.052	1.007	0.954
Q9R099	Transducin beta-like protein 2 OS=Mus musculus OX=10090 GN=Tbl2 PE=1 SV=2	Tbl2	49.583	0.998	1.019	1.03	1.106	1.112	1.117	1.038	1.04	0.996
Q9JME7	Trafficking protein particle complex subunit 2-like protein OS=Mus musculus OX=10090 GN=Trappc2l PE=1 SV=1	Trappc2l	16.018	0.97	0.937	0.925	1.152	1.061	1.042	0.985	0.971	1.04
Q8K0T0	Reticulon-1 OS=Mus musculus OX=10090 GN=Rtn1 PE=1 SV=1	Rtn1	83.571	0.952	0.985	0.936	1.106	1.154	1.091	1.148	1.052	1.078
Q71KT5	Delta(14)-sterol reductase OS=Mus musculus OX=10090 GN=Tm7sf2 PE=1 SV=2	Tm7sf2	46.52	0.689	0.84	0.573	1.072	0.983	1.075	1.155	0.93	1.301
Q62440	Transducin-like enhancer protein 1 OS=Mus musculus OX=10090 GN=Tle1 PE=1 SV=2	Tle1	83.096		1.053			1.076			0.956
P15307	Proto-oncogene c-Rel OS=Mus musculus OX=10090 GN=Rel PE=1 SV=2	Rel	64.959
Q8K4Q6	Endonuclease 8-like 1 OS=Mus musculus OX=10090 GN=Neil1 PE=2 SV=3	Neil1	43.585
Q8BW41	Protein O-linked-mannose beta-1,4-N-acetylglucosaminyltransferase 2 OS=Mus musculus OX=10090 GN=Pomgnt2 PE=1 SV=1	Pomgnt2	69.378		0.973			1.163			1.075
Q8R2R3	Alpha- and gamma-adaptin-binding protein p34 OS=Mus musculus OX=10090 GN=Aagab PE=1 SV=2	Aagab	34.51
Q9WUD8	Fas apoptotic inhibitory molecule 1 OS=Mus musculus OX=10090 GN=Faim PE=1 SV=1	Faim	20.201	1.046		1.129	1.128		1.25	1.144		1.074
Q3UWA6	Heat-stable enterotoxin receptor OS=Mus musculus OX=10090 GN=Gucy2c PE=2 SV=1	Gucy2c	123.23	0.883	0.909	0.955	1.04	1.067	1.073	1.066	0.929	1.026
Q8C1Z8	tRNA methyltransferase 10 homolog A OS=Mus musculus OX=10090 GN=Trmt10a PE=2 SV=2	Trmt10a	37.965		1.093			0.928			1.137
Q8K201	Keratinocyte-associated transmembrane protein 2 OS=Mus musculus OX=10090 GN=Kct2 PE=1 SV=2	Kct2	28.05
Q6P5G3	MBT domain-containing protein 1 OS=Mus musculus OX=10090 GN=Mbtd1 PE=1 SV=1	Mbtd1	70.669
Q9QZM0	Ubiquilin-2 OS=Mus musculus OX=10090 GN=Ubqln2 PE=1 SV=2	Ubqln2	67.35	1.063	0.989	1.079	0.947	1.085	0.887	1.144	1.085	1.091
Q8CBY0	Glutamyl-tRNA(Gln) amidotransferase subunit C, mitochondrial OS=Mus musculus OX=10090 GN=Gatc PE=1 SV=1	Gatc	16.667		0.915			1.295			1.145
Q8C650	Septin-10 OS=Mus musculus OX=10090 GN=Sept10 PE=1 SV=1	Sept10	52.422
Q6PGD0	All-trans retinoic acid-induced differentiation factor OS=Mus musculus OX=10090 GN=Atraid PE=2 SV=2	Atraid	23.857	0.979		0.996	1.234		1.082	1.044		1.086
Q99J10	Cytoplasmic tRNA 2-thiolation protein 1 OS=Mus musculus OX=10090 GN=Ctu1 PE=2 SV=1	Ctu1	43.823			0.969			0.953			1.174
Q99K90	TGF-beta-activated kinase 1 and MAP3K7-binding protein 2 OS=Mus musculus OX=10090 GN=Tab2 PE=1 SV=1	Tab2	76.441
P50518	V-type proton ATPase subunit E 1 OS=Mus musculus OX=10090 GN=Atp6v1e1 PE=1 SV=2	Atp6v1e1	26.157	0.977	0.955	1.077	1.004	1.006	0.996	0.921	0.933	0.884
Q6P1B1	Xaa-Pro aminopeptidase 1 OS=Mus musculus OX=10090 GN=Xpnpep1 PE=1 SV=1	Xpnpep1	69.59	0.992	0.971	0.94	0.879	0.896	0.931	0.89	0.879	0.923
P49586	Choline-phosphate cytidylyltransferase A OS=Mus musculus OX=10090 GN=Pcyt1a PE=1 SV=1	Pcyt1a	41.666	0.834	0.949	0.913	1.017	1.108	1.073	1.047	0.988	1.014
Q9D824	Pre-mRNA 3'-end-processing factor FIP1 OS=Mus musculus OX=10090 GN=Fip1l1 PE=1 SV=1	Fip1l1	64.958	0.952	0.935	0.933	0.907	0.997	0.925	0.894	1.118	1.131
Q3UGY8	Brefeldin A-inhibited guanine nucleotide-exchange protein 3 OS=Mus musculus OX=10090 GN=Arfgef3 PE=1 SV=1	Arfgef3	240.09		1.066			1.211			1
Q9QXL2	Kinesin-like protein KIF21A OS=Mus musculus OX=10090 GN=Kif21a PE=1 SV=2	Kif21a	186.53	1.083	1.088	1.09	0.956	1.049	0.896	1.17	1.135	1.348
Q8VD00	Sigma intracellular receptor 2 OS=Mus musculus OX=10090 GN=Tmem97 PE=1 SV=1	Tmem97	20.811	0.907	0.89	0.893	1.07	1.062	1.115	1.067	1.035	1.007
P50295	Arylamine N-acetyltransferase 2 OS=Mus musculus OX=10090 GN=Nat2 PE=1 SV=1	Nat2	33.701	0.917	0.887		0.971	1.054		0.938	1.018
P10078	Zinc finger protein 28 OS=Mus musculus OX=10090 GN=Zfp28 PE=2 SV=3	Zfp28	93.308		0.891			0.906			0.656
Q9JHW2	Omega-amidase NIT2 OS=Mus musculus OX=10090 GN=Nit2 PE=1 SV=1	Nit2	30.501	0.906	0.946	0.825	0.769	0.756	0.745	0.916	0.861	0.846
O35491	Dual specificity protein kinase CLK2 OS=Mus musculus OX=10090 GN=Clk2 PE=1 SV=2	Clk2	59.986		1.163			0.988			1.095
Q9Z2N8	Actin-like protein 6A OS=Mus musculus OX=10090 GN=Actl6a PE=1 SV=2	Actl6a	47.447	1.081	1.069	1.037	0.955	1.005	0.958	1.004	1.016	0.987
Q5G865	Alpha-defensin 24 OS=Mus musculus OX=10090 GN=Defa24 PE=3 SV=1	Defa24	10.327	0.456		0.438	0.517		0.778	1.442		0.974
Q99JY9	Actin-related protein 3 OS=Mus musculus OX=10090 GN=Actr3 PE=1 SV=3	Actr3	47.357	0.999	1.023	0.965	0.974	1.007	0.973	0.903	0.875	0.875
O88668	Protein CREG1 OS=Mus musculus OX=10090 GN=Creg1 PE=1 SV=1	Creg1	24.452		0.95			0.946			1.167
Q9D6J1	Ceramide synthase 4 OS=Mus musculus OX=10090 GN=Cers4 PE=1 SV=1	Cers4	46.016	0.914	0.878	0.883	0.938	0.947	1.099	1.085	1.056	1.138
P23780	Beta-galactosidase OS=Mus musculus OX=10090 GN=Glb1 PE=1 SV=1	Glb1	73.12	0.97	0.961	0.915	0.859	0.863	0.924	0.87	0.877	0.902
P22315	Ferrochelatase, mitochondrial OS=Mus musculus OX=10090 GN=Fech PE=1 SV=2	Fech	47.13	0.806	0.751	0.823	1.004	1.025	0.946	1.179	1.279	1.224
Q9EQH4	Transcription initiation factor TFIID subunit 8 OS=Mus musculus OX=10090 GN=Taf8 PE=2 SV=1	Taf8	33.988
Q64112	Interferon-induced protein with tetratricopeptide repeats 2 OS=Mus musculus OX=10090 GN=Ifit2 PE=1 SV=1	Ifit2	55.02
Q8R0L9	Transcriptional adapter 3 OS=Mus musculus OX=10090 GN=Tada3 PE=1 SV=1	Tada3	48.9	1.13	1.096	1.026	0.999	0.91	0.959	0.889	0.973	1.02
Q9Z1Z2	Serine-threonine kinase receptor-associated protein OS=Mus musculus OX=10090 GN=Strap PE=1 SV=2	Strap	38.442	1.044	1.028	1.066	0.984	0.956	0.992	0.989	0.946	0.944
O70566	Protein diaphanous homolog 2 OS=Mus musculus OX=10090 GN=Diaph2 PE=1 SV=2	Diaph2	124.87	0.998		1.093	0.904		1.08	0.976		1.218
Q9JKB3	Y-box-binding protein 3 OS=Mus musculus OX=10090 GN=Ybx3 PE=1 SV=2	Ybx3	38.813	1.11	1.098	1.108	0.854	0.95	0.9	1.015	1.064	1.105
Q9Z2U0	Proteasome subunit alpha type-7 OS=Mus musculus OX=10090 GN=Psma7 PE=1 SV=1	Psma7	27.855	0.994	1.03	0.988	0.903	0.859	0.809	0.93	0.938	0.945
Q78RX3	Small integral membrane protein 12 OS=Mus musculus OX=10090 GN=Smim12 PE=3 SV=1	Smim12	10.795	1.023	0.973		1.039	1.156		1.108	1.096
Q80WT5	Aftiphilin OS=Mus musculus OX=10090 GN=Aftph PE=1 SV=2	Aftph	101.13	0.95			1.087			1.301
Q9CQV5	28S ribosomal protein S24, mitochondrial OS=Mus musculus OX=10090 GN=Mrps24 PE=1 SV=1	Mrps24	18.901		0.981			1.069			0.909
Q91VA1	Choline transporter-like protein 4 OS=Mus musculus OX=10090 GN=Slc44a4 PE=1 SV=1	Slc44a4	78.722	1.023	0.962	1.012	1.203	0.998	0.962	1.109	0.984	1.052
Q921M4	Golgin subfamily A member 2 OS=Mus musculus OX=10090 GN=Golga2 PE=1 SV=3	Golga2	113.28	1.028	1.02	1.056	1.065	1.117	0.953	1.046	1.045	1.016
P59999	Actin-related protein 2/3 complex subunit 4 OS=Mus musculus OX=10090 GN=Arpc4 PE=1 SV=3	Arpc4	19.667	1.001	0.986	1.006	0.919	0.937	0.943	0.875	0.866	0.815
Q8K5B2	Multiple coagulation factor deficiency protein 2 homolog OS=Mus musculus OX=10090 GN=Mcfd2 PE=1 SV=1	Mcfd2	16.168		0.978	0.925		1.125	1.168		0.852	0.973
Q9CQM5	Thioredoxin domain-containing protein 17 OS=Mus musculus OX=10090 GN=Txndc17 PE=1 SV=1	Txndc17	14.015	0.984	0.92	0.924	0.787	0.841	0.702	0.782	0.867	0.721
Q8R5F3	O-acetyl-ADP-ribose deacetylase 1 OS=Mus musculus OX=10090 GN=Oard1 PE=1 SV=2	Oard1	17.107		1.002	1.052		0.841	0.893		0.918	1.005
O70166	Stathmin-3 OS=Mus musculus OX=10090 GN=Stmn3 PE=1 SV=1	Stmn3	20.954
Q8K2Q9	Shootin-1 OS=Mus musculus OX=10090 GN=Shtn1 PE=1 SV=1	Shtn1	71.342	1.055	1.027	1.05	0.957	0.962	0.965	0.942	0.96	1.016
Q9Z1X2	Phosphatidylserine synthase 2 OS=Mus musculus OX=10090 GN=Ptdss2 PE=1 SV=2	Ptdss2	55.02
Q8BHK1	Magnesium transporter NIPA1 OS=Mus musculus OX=10090 GN=Nipa1 PE=1 SV=1	Nipa1	34.105
P43680	Transcription factor SOX-18 OS=Mus musculus OX=10090 GN=Sox18 PE=1 SV=3	Sox18	40.898
P58854	Gamma-tubulin complex component 3 OS=Mus musculus OX=10090 GN=Tubgcp3 PE=1 SV=2	Tubgcp3	103.47		0.947	0.817		1.003	1.089		0.95	0.948
Q8CCI5	RING1 and YY1-binding protein OS=Mus musculus OX=10090 GN=Rybp PE=1 SV=1	Rybp	24.776
Q8BW72	Lysine-specific demethylase 4A OS=Mus musculus OX=10090 GN=Kdm4a PE=1 SV=3	Kdm4a	120.33	1.038	0.988	0.905	0.997	0.945	0.903	1.42	1.218	1.026
Q91VW3	SH3 domain-binding glutamic acid-rich-like protein 3 OS=Mus musculus OX=10090 GN=Sh3bgrl3 PE=1 SV=1	Sh3bgrl3	10.477	0.897	0.765		0.923	0.759		1.339	1.768
Q8R016	Bleomycin hydrolase OS=Mus musculus OX=10090 GN=Blmh PE=1 SV=1	Blmh	52.511	1.022	1.013	1.008	0.845	0.838	0.813	0.884	0.861	0.866
Q8CFE4	SCY1-like protein 2 OS=Mus musculus OX=10090 GN=Scyl2 PE=1 SV=1	Scyl2	103.32	0.967	0.977	1.021	1.046	1.1	1.014	1.042	1.028	0.996
Q8BTY8	Sec1 family domain-containing protein 2 OS=Mus musculus OX=10090 GN=Scfd2 PE=1 SV=1	Scfd2	74.75			1.051			0.994			1.351
Q80WQ6	Inactive rhomboid protein 2 OS=Mus musculus OX=10090 GN=Rhbdf2 PE=1 SV=1	Rhbdf2	93.433	0.799	1.014	0.848	0.974	0.91	1.049	1.412	1.105	1.246
Q9CWR1	WD repeat-containing protein 73 OS=Mus musculus OX=10090 GN=Wdr73 PE=1 SV=1	Wdr73	40.856
Q9CQ39	Mediator of RNA polymerase II transcription subunit 21 OS=Mus musculus OX=10090 GN=Med21 PE=1 SV=1	Med21	15.588		1.085	1.099		1.017	1.252		1.189	1.078
P21550	Beta-enolase OS=Mus musculus OX=10090 GN=Eno3 PE=1 SV=3	Eno3	47.024			1.077			0.913			0.916
Q8R238	Serine dehydratase-like OS=Mus musculus OX=10090 GN=Sdsl PE=1 SV=1	Sdsl	34.732	0.994	0.892		1.145	0.805		1.084	0.896
A2A4P0	ATP-dependent RNA helicase DHX8 OS=Mus musculus OX=10090 GN=Dhx8 PE=2 SV=1	Dhx8	142.57	1.014	1.093	0.9	1.089	1.015	1.093	1.031	1.096	1.118
Q8BVU5	ADP-ribose pyrophosphatase, mitochondrial OS=Mus musculus OX=10090 GN=Nudt9 PE=1 SV=1	Nudt9	38.604		1.011			1.051			1.043
Q80YX1	Tenascin OS=Mus musculus OX=10090 GN=Tnc PE=1 SV=1	Tnc	231.8			0.887			0.773			0.852
Q61211	Eukaryotic translation initiation factor 2D OS=Mus musculus OX=10090 GN=Eif2d PE=1 SV=3	Eif2d	62.829	0.994		1.034	0.947		1.006	1.015		1.094
[truncated: 4,566 more rows]
